# Supplementary material
Source: publisher site journal article supplement (https://www.dovepress.com/get_supplementary_file.php?f=147717.xlsx)
Supplement: Supplementary file 1 [file get_supplementary_file.php]

## Sheet: Table S1-HG-U133 A
Gene Symbol	P value	HR	Low 95%CI	High 95%CI
NPDC1	4.16553e-08	3.17442	2.10068	4.79697
SOCS2	1.99873e-06	2.70016	1.79275	4.06684
HOPX	2.40862e-06	2.66111	1.77173	3.99696
IL2RA	5.03568e-06	2.5825	1.71817	3.88163
FHL1	1.35079e-05	2.46119	1.64051	3.69243
KIAA0922	2.3179e-05	0.419255	0.280304	0.627085
TM4SF1	2.78992e-05	2.39606	1.59213	3.60592
GPR56	3.12004e-05	2.36188	1.57612	3.53937
TADA3	3.1516e-05	0.426082	0.285117	0.63674
ITGAV	3.3406e-05	2.33191	1.56316	3.47873
IQCJ-SCHIP1	4.70225e-05	2.29976	1.53995	3.43445
RAB38	5.00517e-05	2.30907	1.54095	3.46008
LGALS3	7.44508e-05	0.445381	0.2985	0.664536
TCF4	0.000103205	2.215	1.48266	3.30908
KIAA0125	0.000120795	2.195	1.47017	3.27719
ROBO3	0.000150185	2.16995	1.45376	3.23896
GPN1	0.000189447	2.1441	1.43653	3.2002
FAM21C	0.000194229	0.468665	0.314591	0.698196
ARMCX1	0.000204078	2.12404	1.42727	3.16096
FAS	0.000204369	0.465214	0.310631	0.696725
RAB13	0.000234542	2.11306	1.41839	3.14794
GCHFR	0.000260683	0.475665	0.319221	0.708778
NGFRAP1	0.000275849	2.10104	1.40823	3.13467
TSC22D1	0.000292678	2.08497	1.40092	3.10305
MXRA7	0.000375257	2.06968	1.38622	3.09013
HIST1H2BO	0.000403934	2.05925	1.38006	3.0727
VAV3	0.000429727	2.04097	1.37206	3.03599
CPT1A	0.00043869	2.0441	1.37214	3.04512
ATF5	0.000441744	0.489963	0.329108	0.729436
RP1-192P9.1	0.000449908	0.492825	0.331927	0.731718
GRB10	0.000471197	2.04279	1.36878	3.0487
LOC100506403	0.000509125	2.02082	1.35909	3.00472
CCL23	0.000528668	0.493705	0.331221	0.735896
ASNS	0.000552614	2.02356	1.35645	3.01874
ZNF85	0.000580683	2.00643	1.3494	2.98339
GTPBP2	0.000611719	0.497912	0.334131	0.741974
MAP1A	0.000624523	1.99476	1.34296	2.96291
GLTSCR2	0.00063686	1.99008	1.34079	2.95378
CHRNA5	0.000640022	1.99545	1.34212	2.96682
PRKAR2B	0.00065067	0.502271	0.338084	0.746194
SLC16A10	0.00068732	1.98635	1.33649	2.95221
PAPOLB	0.000693473	1.99698	1.33912	2.97802
KRT23	0.000700842	0.502286	0.337298	0.747976
DVL1	0.000702205	1.99287	1.33742	2.96956
ME3	0.000716111	1.98438	1.33417	2.95148
FADS1	0.000732525	1.984	1.33309	2.95275
HEATR6	0.000739279	1.98509	1.333	2.95618
NDUFB5	0.000781562	1.97097	1.32662	2.92827
SDR39U1	0.000803594	1.97617	1.32687	2.9432
BCAT1	0.00080375	1.98088	1.32818	2.95436
ACVR1	0.000813404	1.96911	1.32437	2.92773
ATP6V0D1	0.000857105	0.507175	0.34026	0.75597
CTC-338M12.4	0.000901288	1.95833	1.3169	2.91219
TBC1D16	0.000911389	1.95083	1.31435	2.89555
ARNTL2	0.000934191	1.95539	1.31451	2.90873
ATF3	0.000941577	1.96085	1.31566	2.92245
KARS	0.000956783	1.9459	1.31086	2.88858
DDX50	0.000963768	1.95218	1.31226	2.90417
E2F6	0.0009662	1.94483	1.31014	2.88701
PCTP	0.000979207	0.510556	0.342338	0.761434
GCFC2	0.00104209	1.94495	1.30682	2.8947
DDI2	0.00106112	0.516944	0.348247	0.767361
BSG	0.00106882	0.517343	0.34859	0.767787
CTSL	0.00106986	0.516207	0.347356	0.767137
TCTN3	0.00107093	1.94166	1.3047	2.88958
WDR60	0.00108818	1.94128	1.30388	2.89027
CLU	0.00113686	1.94535	1.30299	2.90439
ACP6	0.0011399	1.93687	1.30061	2.88439
RPL31	0.00114239	1.92361	1.29696	2.85302
PI4KB	0.00115623	0.51594	0.346138	0.769041
BCL11A	0.00115858	1.92703	1.29725	2.86257
ULK1	0.00122231	0.517849	0.347517	0.771668
CGREF1	0.00123581	1.92586	1.29402	2.86622
ZNF106	0.00127738	0.518082	0.347226	0.77301
NOV	0.00131477	1.92001	1.28965	2.85849
SERPING1	0.00132541	1.91716	1.28853	2.85246
SMAD1	0.00132808	1.9082	1.28609	2.83123
KCNH2	0.00133959	0.525287	0.354434	0.778498
HIST1H2BH	0.00134269	1.93269	1.29198	2.89112
MRPL28	0.00137629	0.524281	0.353002	0.778665
ADRM1	0.00137686	0.522807	0.351399	0.777828
TAGLN	0.00139126	0.523219	0.351714	0.778355
CDK2AP1	0.00141291	1.90868	1.28338	2.83865
BZW2	0.00147179	1.90208	1.27979	2.82696
DUS2	0.00149765	0.52655	0.354396	0.782331
NR1H2	0.0015199	0.525776	0.353364	0.78231
DCLK2	0.00152107	0.526624	0.354277	0.782814
DUSP14	0.00163178	1.88636	1.27097	2.7997
VASP	0.00163978	0.529271	0.356187	0.786462
PPARGC1A	0.0017011	0.526455	0.352635	0.785953
REC8	0.00170189	1.88344	1.26827	2.797
STXBP2	0.00171871	0.531074	0.357539	0.788835
TNFRSF9	0.00173068	0.531091	0.357466	0.789048
ABCG1	0.00173336	1.88359	1.26745	2.79927
OLA1	0.00174817	1.88052	1.26628	2.79274
LAMB3	0.00175456	0.533069	0.35945	0.790547
ABCA7	0.00176444	0.533297	0.359626	0.790837
LEF1	0.00177218	0.530879	0.356919	0.789626
GPS2	0.0017773	0.53194	0.358041	0.790299
CACNB3	0.0018097	1.88158	1.26491	2.7989
NAB1	0.00181959	1.87582	1.26321	2.78552
SCPEP1	0.00183728	0.534004	0.35986	0.792419
HIST1H2AM	0.00183996	1.8854	1.26507	2.80991
GUCY1A3	0.00184393	1.87691	1.26285	2.78955
PDCL3	0.00185203	1.87656	1.26256	2.78916
FECH	0.00191727	0.535427	0.360849	0.794468
SYNJ2	0.0019231	1.86808	1.25866	2.77256
STK32B	0.0019413	1.86529	1.25753	2.7668
SSBP3	0.00194146	0.534787	0.359974	0.794494
ENPP2	0.00194864	1.87711	1.26027	2.79587
KIAA0907	0.00195043	1.86543	1.25734	2.76761
MIR1304	0.0019971	1.86544	1.25621	2.77013
ERG	0.0020075	1.86501	1.25586	2.76963
UCP2	0.00201042	0.536799	0.36171	0.796641
RBPMS	0.00202335	1.86705	1.25598	2.7754
NPM1	0.00203114	1.8647	1.25522	2.77012
EIF4A2	0.00203863	1.86627	1.25543	2.77433
MPP6	0.00208547	1.85938	1.25266	2.75998
OSBPL9	0.00212415	1.85611	1.25098	2.75397
LOC150776	0.00212778	0.537176	0.36134	0.798576
RXRB	0.00214932	0.537509	0.361567	0.799065
CSNK1E	0.00216395	1.85841	1.25064	2.76153
GOLGA8A	0.00218443	1.86072	1.25075	2.76817
ECM1	0.00219302	1.85674	1.24959	2.75889
TCEAL4	0.00222648	1.85752	1.24905	2.7624
CORO7	0.00232406	0.538592	0.36166	0.802082
STATH	0.00232495	1.86365	1.2484	2.78211
HIST1H2AG	0.00234264	1.85327	1.24555	2.75751
ATP5C1	0.00235024	1.84647	1.24376	2.74125
LRP10	0.0024212	0.54158	0.364378	0.804956
APOBR	0.00246923	0.542309	0.364903	0.805963
NPTX2	0.0024822	1.84426	1.24056	2.74172
BBOX1	0.00248721	0.539758	0.361975	0.804858
BCL11B	0.00253136	0.541695	0.363863	0.806438
TTC28	0.00254734	1.83314	1.23666	2.71733
TOX	0.00262243	1.84057	1.23698	2.73869
BSPRY	0.00263581	1.83911	1.23638	2.73567
LYRM1	0.00265339	1.8365	1.23544	2.72998
RPL22	0.00265667	1.82833	1.23347	2.71008
HSD17B12	0.00267917	1.83193	1.2339	2.71982
CLIC4	0.00269582	1.82988	1.23311	2.71546
PDK4	0.00269931	0.545598	0.367257	0.810544
FOXO3	0.00273938	0.545851	0.36732	0.811155
ABCC1	0.00275527	1.82889	1.2318	2.7154
GTF2IRD1	0.00279424	1.82814	1.23093	2.7151
CD27	0.00281464	0.546611	0.367764	0.812434
RPS19	0.00283299	1.83006	1.23069	2.72135
AL590762.11	0.0028611	1.82083	1.22806	2.69972
FKBP11	0.00289594	1.8323	1.2301	2.72931
ARHGEF10L	0.00291095	0.547905	0.368702	0.814206
METAP1	0.00291162	1.82264	1.2276	2.70609
PIGP	0.00291495	1.82467	1.22802	2.71123
LOC100131510	0.00294605	1.82314	1.22713	2.70863
HINT1	0.00299063	1.81764	1.22512	2.69673
DDIT4	0.00300039	1.81736	1.22489	2.6964
MAGOH	0.00301312	1.82223	1.22579	2.70889
CPM	0.00301774	0.550953	0.371566	0.816945
SUPT3H	0.0030376	1.82044	1.22498	2.70535
ITGA6	0.00306967	1.81788	1.22386	2.70022
ZC4H2	0.0031229	1.8108	1.22139	2.68464
HMBS	0.00319499	0.55264	0.372585	0.819708
GALNT12	0.00322893	1.81041	1.21962	2.6874
NANS	0.00324579	1.81279	1.21989	2.69386
PDGFC	0.00332526	1.8032	1.21651	2.67282
ZNF22	0.00333593	1.80668	1.21713	2.6818
HIST1H4J	0.00334371	1.80996	1.21774	2.69018
IVNS1ABP	0.00336315	0.553374	0.372614	0.821823
FEM1B	0.00337612	0.55192	0.370922	0.821239
USE1	0.00341347	1.80856	1.21637	2.68905
SELENBP1	0.00347315	0.555059	0.374004	0.823761
GFI1B	0.00348507	0.555615	0.374577	0.824152
ACSF2	0.00348905	1.80338	1.2141	2.67866
TMOD1	0.00355181	0.555523	0.374174	0.824767
ZMYM2	0.00357114	1.80662	1.21362	2.68937
SNRPF	0.00358841	1.80113	1.21216	2.67626
ABTB2	0.00361256	0.556529	0.375038	0.825848
LOC100506076	0.00363935	1.79859	1.21088	2.67156
KAT2A	0.00364627	1.79846	1.21075	2.67144
TGFBRAP1	0.00368439	1.79452	1.20935	2.66283
XBP1	0.00369761	1.8016	1.21072	2.68086
HIST1H1C	0.00370309	1.79607	1.20943	2.66726
CCNC	0.00370935	1.79611	1.20935	2.66755
HMGN5	0.00371346	1.79849	1.20982	2.6736
B4GALT6	0.00371454	1.79247	1.20849	2.65866
USO1	0.00378539	1.79257	1.20753	2.66105
TOM1	0.00381071	0.557651	0.375449	0.828272
RNH1	0.00382255	0.557643	0.37539	0.828379
C11orf95	0.00394894	1.78251	1.20317	2.64083
SCN9A	0.00395601	1.78793	1.20424	2.65453
MAP3K8	0.00399806	0.560336	0.377709	0.831267
MICB	0.00405722	0.559569	0.3766	0.831434
DBN1	0.00408371	1.78493	1.20194	2.65069
DENR	0.00409526	1.78522	1.20185	2.65175
TFPI	0.00412819	1.78148	1.20064	2.64333
SLC7A6	0.00413843	1.77899	1.19997	2.63739
SCARF1	0.00416827	1.78412	1.20069	2.65103
CNGB1	0.00421804	0.560877	0.377441	0.833463
IQSEC1	0.00424122	0.562623	0.379332	0.834479
FAM124B	0.00425523	1.78196	1.19915	2.64804
COL9A2	0.00425624	0.56101	0.377443	0.833855
IKZF4	0.0042655	0.561552	0.378021	0.834188
MYO5C	0.00430153	1.77897	1.19795	2.64181
MTHFD2L	0.00431907	1.77098	1.19604	2.62229
CYP51A1	0.00437536	1.77517	1.19625	2.63426
SF3B4	0.00439181	0.561838	0.377859	0.835396
WDR7	0.00440065	0.562518	0.378598	0.835786
NRBP1	0.00441224	0.563068	0.379179	0.836138
HIST2H2BE	0.00441431	1.77048	1.19479	2.62354
MAPKBP1	0.0044196	1.77668	1.19603	2.63921
CLCN1	0.00447817	0.564061	0.380059	0.837145
DSE	0.00450202	1.7691	1.19347	2.62236
SPTLC2	0.00452628	0.563146	0.378839	0.837121
DEPDC5	0.00454361	0.562827	0.378411	0.837117
LUC7L3	0.00458184	1.7701	1.19275	2.62692
PDIA3	0.00458461	0.563187	0.378668	0.837619
DCX	0.00460357	0.566345	0.382197	0.839219
ALDH7A1	0.00462537	1.76437	1.19106	2.61365
YIPF6	0.00470664	0.562784	0.377763	0.838424
GALNT7	0.00478356	1.76315	1.18902	2.61451
NABP1	0.00483991	1.75906	1.18755	2.60559
NADK	0.00485997	0.567511	0.382603	0.841783
ARAF	0.0048661	0.568231	0.383405	0.842155
ENAH	0.00487195	1.76167	1.18774	2.61292
STX11	0.00488776	0.568555	0.383699	0.842469
KLF1	0.00494862	0.56893	0.383915	0.843107
ANK1	0.00495043	0.566844	0.381523	0.842184
NR1H3	0.00498287	1.75996	1.18618	2.61128
NDUFS4	0.00504103	1.75546	1.18465	2.60132
CCL5	0.00506612	0.570004	0.384739	0.84448
ME1	0.00514931	1.75382	1.18317	2.5997
NDST1	0.00517612	0.567617	0.38163	0.844244
OBFC1	0.00520309	1.75612	1.18308	2.60674
VDAC1	0.00526298	1.76223	1.18368	2.62355
TFIP11	0.00530873	0.570167	0.384106	0.846355
SIGLEC1	0.0053171	0.570398	0.384344	0.846518
SNRPD2	0.00534215	1.75315	1.18105	2.60237
FAM35A	0.00535808	1.74681	1.17963	2.58672
YWHAE	0.00543577	1.75555	1.18058	2.61053
CTSV	0.00543799	0.572007	0.385795	0.8481
BAZ1B	0.00550118	0.571999	0.38558	0.848548
PIN1P1	0.0055576	0.572617	0.386108	0.849217
SPOCK1	0.00556118	0.573086	0.386638	0.849446
MDH2	0.00557133	1.74855	1.17785	2.59577
LOC100506558	0.00563188	1.74437	1.17644	2.58648
GRK6	0.00566974	0.573915	0.387247	0.850566
ATP6V0C	0.00570453	0.572939	0.386012	0.850386
CDK16	0.00572942	0.573038	0.386047	0.850601
GS1-111G14.1	0.00574102	1.74261	1.17504	2.58432
PRSS12	0.00577602	0.571408	0.384026	0.850221
HBA1	0.00579153	0.573797	0.386728	0.851357
TEAD4	0.00585852	1.74891	1.17516	2.6028
MAGEH1	0.00588854	1.73992	1.17313	2.58055
GYPE	0.00589542	0.573357	0.385899	0.851878
MAL	0.0059011	0.573663	0.386233	0.852048
RPS29P28	0.00595056	1.73584	1.17176	2.57147
LOC100996668	0.00595252	1.74201	1.17294	2.58717
WBP5	0.00596639	1.74116	1.17264	2.58529
DTX2	0.00598198	0.573699	0.386027	0.85261
DOCK1	0.00598663	1.73749	1.17175	2.57639
MIR4746	0.00599045	0.573958	0.3863	0.852777
ACYP2	0.005991	1.73762	1.17173	2.5768
PILRA	0.00603918	0.575807	0.388287	0.85389
PRAF2	0.00604182	1.73665	1.17108	2.57537
GRAMD1C	0.00607	1.73322	1.17016	2.56722
SLC36A1	0.00607362	0.575186	0.387465	0.853856
ATG3	0.00607858	0.577368	0.389974	0.854813
SFRP4	0.00608635	1.72876	1.16915	2.55623
HIST1H2BD	0.0061264	1.73531	1.17005	2.57363
LOX	0.00616945	1.73836	1.17025	2.58226
MSANTD3-TMEFF1	0.00619324	1.73126	1.16868	2.56465
LYRM9	0.0061999	1.7332	1.16899	2.56972
EDNRB	0.00627077	1.73415	1.16854	2.57354
CYFIP1	0.00628718	1.73035	1.16767	2.56418
ALDOC	0.00629901	1.73297	1.16806	2.57107
NSD1	0.00633934	0.576729	0.388459	0.856245
FAM21A	0.00637518	0.578048	0.389883	0.857026
COL4A5	0.00641374	1.73009	1.16651	2.56595
GABARAP	0.00643483	0.574092	0.385135	0.855756
GMPR2	0.00646588	1.73416	1.16683	2.57733
GYPA	0.00649377	0.579969	0.391768	0.858578
S100A12	0.00658838	0.579096	0.390484	0.858811
PPA1	0.00662485	1.72532	1.16381	2.55774
SIRT7	0.00664816	0.577689	0.388683	0.858604
ATP5B	0.00665077	1.72258	1.16308	2.55125
DAB2	0.00668866	1.72945	1.16404	2.5695
ID1	0.00676693	1.73282	1.16401	2.57958
HSPD1	0.00684564	1.72315	1.16156	2.55624
IFNG	0.00687576	0.581202	0.392127	0.861445
UBA5	0.00689137	1.72471	1.16148	2.56106
POLE3	0.00693673	0.579827	0.39036	0.861255
RNF115	0.00698875	1.72498	1.16073	2.56352
PNISR	0.00701478	1.7205	1.1597	2.55249
ZNF592	0.00703634	0.58161	0.392162	0.862577
NEUROD1	0.00712378	0.579988	0.390038	0.862443
WARS2	0.00712958	1.71758	1.15824	2.54703
WNT4	0.00713838	0.579747	0.389719	0.862432
SLC29A2	0.00717655	1.71722	1.15781	2.54693
MVB12B	0.00721853	0.580327	0.390179	0.863141
RPS7	0.00732572	1.7113	1.15556	2.5343
TRIM46	0.00734477	0.583666	0.393735	0.865216
OBSL1	0.00741574	1.71271	1.15513	2.53945
EFNA4	0.00748383	1.71245	1.15456	2.53993
ERV3-2	0.00749697	1.71008	1.15403	2.53405
HIST1H2APS4	0.00750608	1.71185	1.15428	2.53876
ENTPD6	0.00760663	1.71275	1.15368	2.54274
SLC25A22	0.00760941	0.585954	0.395722	0.867633
CDKN1C	0.00761098	1.71191	1.1535	2.54066
PARK7	0.0076431	1.7093	1.15279	2.53446
CCNB1IP1	0.00765625	1.71018	1.15285	2.53694
CLASP1	0.00768282	0.584211	0.393495	0.867361
LAPTM4B	0.00768482	1.71207	1.15297	2.54229
FMNL1	0.00773828	0.584853	0.394105	0.867925
CYFIP2	0.00774052	1.71134	1.15243	2.54131
ARFGAP2	0.00775063	0.584552	0.393721	0.867875
TESC	0.00777385	0.587157	0.396713	0.869023
LYRM4	0.00785213	1.71011	1.15138	2.53997
HSD17B1	0.00796664	0.585175	0.393907	0.869316
PRDX6	0.00798741	1.7087	1.15015	2.53851
SYT11	0.00801122	1.70285	1.14894	2.52378
IRF4	0.00805076	0.586045	0.394717	0.870113
RPS4XP3	0.0080903	1.70254	1.14832	2.52423
RNASEH1	0.00813839	1.6994	1.14743	2.51689
TYRO3	0.00814143	1.70204	1.14787	2.52376
SPCS1	0.00814689	1.69802	1.14713	2.51347
HBD	0.0082044	0.588671	0.397423	0.871953
CCNH	0.00822193	1.69998	1.14694	2.51967
NFATC1	0.00823387	1.6977	1.14646	2.51397
TRIM26	0.00826241	0.585262	0.393282	0.870956
REG1A	0.00828016	0.588838	0.397435	0.87242
TRIB2	0.00829851	0.588919	0.397485	0.872549
KDM7A	0.00830047	0.58749	0.395802	0.872013
JUP	0.00830158	1.69973	1.14634	2.52025
TNFSF4	0.00833358	1.6952	1.14533	2.50907
SPINT2	0.0083673	1.7	1.14593	2.52198
SLC4A1	0.00837847	0.58838	0.39666	0.872767
SACM1L	0.00846711	1.69528	1.14443	2.51129
ZNF426	0.00853413	1.69555	1.14402	2.51299
B3GNT1	0.00854495	1.69496	1.14384	2.51162
ASCC2	0.00855973	0.589647	0.397718	0.874197
ATP1B1	0.00865083	1.70062	1.14409	2.52787
SEC62	0.00871566	0.589817	0.397551	0.875068
ZNF350	0.00884561	1.6891	1.14082	2.50086
RSAD1	0.0088641	1.69474	1.14166	2.51577
VCL	0.00894346	0.591883	0.39946	0.876998
SEPP1	0.00897098	1.69276	1.14062	2.51218
ZNF33B	0.00901498	1.68775	1.13949	2.49982
HBB	0.00906986	0.593181	0.400706	0.878111
CDCA8	0.0090901	0.593025	0.400475	0.878154
GPAA1	0.00912745	0.59359	0.401059	0.878548
ARF1	0.00915601	0.59047	0.397308	0.877542
GIPC2	0.00924544	0.593504	0.400691	0.879099
RPL7A	0.00925805	1.68621	1.13766	2.49924
SC5D	0.00941692	1.68538	1.13652	2.4993
ADD2	0.00945602	0.594558	0.401471	0.880511
ZNF141	0.00948155	1.67797	1.13489	2.48092
CYB561	0.00960894	1.68227	1.13481	2.49384
GABARAPL2	0.00978342	0.594884	0.401143	0.882197
LOC100505915	0.0098131	0.59295	0.398787	0.881646
GMPR	0.00982108	0.596303	0.402746	0.882882
ATP5O	0.0098655	1.67986	1.13285	2.49101
ACTBP9	0.00991801	0.596107	0.402305	0.883268
OGT	0.00994755	1.67795	1.13205	2.4871
YKT6	0.0100163	0.594542	0.400239	0.883174
NOS3	0.0100484	0.596634	0.402654	0.884064
POLI	0.0100779	1.67522	1.13083	2.48169
CAPG	0.0101104	0.597009	0.402968	0.884484
RPL27AP	0.0102155	1.67798	1.13046	2.4907
CLK3	0.0102402	0.597518	0.403302	0.885262
SLC22A14	0.0103001	0.597304	0.402922	0.885461
C1orf50	0.0103597	1.67507	1.12915	2.48493
EN1	0.0103818	0.596321	0.401584	0.885491
RFPL2	0.0104385	0.597838	0.403271	0.886278
MYO7A	0.0105449	0.594781	0.39942	0.885697
NAA60	0.0105632	0.597405	0.402499	0.886691
ZC2HC1C	0.0105723	1.6736	1.12769	2.48378
HBG1	0.0105763	0.599137	0.404537	0.88735
DLX5	0.0105812	0.599631	0.405115	0.887542
HMGN3	0.0105934	1.66943	1.12691	2.47312
SCD	0.0105945	1.67405	1.12763	2.48526
GLS	0.0106381	1.66987	1.12673	2.47485
FOXO4	0.010648	0.598518	0.403652	0.887457
ZNF135	0.0106744	1.66821	1.12626	2.47094
PHKA2	0.0106862	0.5985	0.403552	0.887622
VAMP5	0.0107351	1.67035	1.12625	2.4773
TAF9B	0.0107453	1.66871	1.12594	2.47314
GALC	0.0107846	0.600521	0.405766	0.888753
NUDT9	0.0108313	1.66742	1.12525	2.47082
FDFT1	0.0108367	1.67331	1.12614	2.48634
ADPRM	0.0108493	1.66596	1.12493	2.4672
APBA2	0.0108534	0.598127	0.40277	0.888238
GABRR1	0.0108544	0.595912	0.400133	0.887483
ARTN	0.0108718	0.60102	0.406187	0.889307
EPB42	0.0108884	0.599115	0.403879	0.88873
NHP2L1	0.0109083	1.66823	1.12495	2.47387
NPY2R	0.0109428	0.600544	0.405476	0.889457
GPR132	0.0110667	0.59893	0.403301	0.889451
RPL15	0.0110706	1.65927	1.12267	2.45234
PRKACA	0.0110716	0.600576	0.405258	0.89003
SRP14	0.0111909	1.66262	1.12253	2.46258
RAB5A	0.0112175	0.59796	0.401848	0.88978
ANAPC2	0.0112858	0.600933	0.405263	0.891077
ANKRD1	0.0113659	1.66053	1.12126	2.45916
NUDT1	0.0113663	1.66991	1.12269	2.48386
RANGAP1	0.0114701	0.602849	0.407199	0.892505
LOC101928061	0.0114957	1.65896	1.12033	2.45655
SUCLG1	0.0115029	1.66126	1.12064	2.46269
VTI1B	0.0115192	0.601943	0.406018	0.892412
SET	0.0115808	1.65684	1.11956	2.45197
RNF139	0.0115811	0.602621	0.406711	0.892899
RRAGD	0.0116314	1.65736	1.11937	2.45393
SPARC	0.0116634	1.6595	1.11953	2.45993
PHGDH	0.0117399	1.65953	1.11913	2.46089
LOC100506469	0.011798	1.65586	1.11827	2.45187
PSAT1	0.0118219	1.66049	1.11884	2.46435
WLS	0.0118249	0.6034	0.40718	0.894177
CD2	0.0118553	0.601335	0.404648	0.893626
ARFGAP3	0.0119047	1.6596	1.11828	2.46297
NHP2	0.0119071	1.65868	1.11813	2.46055
FCGRT	0.0119365	0.603467	0.40705	0.894662
HIST1H2BE	0.0119432	1.6606	1.11823	2.46605
TPM2	0.0119453	1.65802	1.11783	2.45924
NPPC	0.0119483	0.605337	0.409275	0.895321
ZNHIT3	0.0119554	1.65266	1.11698	2.44522
XPO7	0.01196	0.603956	0.407592	0.894919
FANCC	0.0120057	0.603303	0.406723	0.894895
MANF	0.0120119	1.66477	1.11849	2.47786
RNF14	0.0120658	0.60341	0.406738	0.895178
CTSK	0.0121243	0.60451	0.407951	0.895775
GID4	0.012125	1.65564	1.11656	2.455
IRS2	0.0122356	0.603799	0.40689	0.896
GLYR1	0.0122371	1.65264	1.11554	2.44833
TAF7	0.0122657	1.65286	1.11543	2.44923
TMEM97	0.0123037	1.65363	1.11535	2.45168
DDX42	0.0123259	1.65238	1.11506	2.44862
HIST1H4A	0.0123276	1.66025	1.1162	2.46949
NELL2	0.0123643	0.604105	0.40702	0.896622
FAM192A	0.0124461	1.65413	1.11471	2.45458
SLC14A1	0.0124698	0.605709	0.408756	0.897561
CD58	0.0124818	0.605814	0.408861	0.897643
CELSR1	0.0125526	0.606345	0.409371	0.898096
EFNA2	0.012564	0.604543	0.407181	0.897567
TM4SF5	0.0125693	0.605042	0.407772	0.897748
DQ583205	0.0126794	0.606528	0.409362	0.898658
EIF2D	0.012722	1.64865	1.11255	2.44309
PKLR	0.012783	0.606705	0.409389	0.899125
FAH	0.012807	1.65072	1.11243	2.44949
DAPK1	0.0128091	1.64873	1.11213	2.44422
OXSM	0.0128318	1.64664	1.11172	2.43894
LOC101928274	0.0128964	1.64738	1.11152	2.44157
CST4	0.0129206	0.607318	0.409881	0.899859
JAM3	0.012923	1.64822	1.11151	2.4441
SLCO4A1	0.0129634	1.64742	1.1112	2.4424
H3F3A	0.0129887	1.64325	1.11048	2.43162
CLN8	0.0129933	0.60775	0.410273	0.900278
UBR4	0.0130374	0.606686	0.40891	0.900118
PLAU	0.0130617	1.6486	1.11089	2.44659
CLPTM1	0.0131175	0.607036	0.409191	0.90054
ADCY2	0.013178	1.64494	1.10982	2.43809
NPLOC4	0.0132483	0.608626	0.410881	0.90154
NR1D1	0.0133778	0.608642	0.410674	0.902042
H1F0	0.0133879	1.63961	1.10807	2.42612
DNAJB14	0.013472	1.6448	1.1084	2.44077
ALG11	0.0134888	1.63956	1.10759	2.42701
ATF4	0.0135046	0.607106	0.408598	0.902056
DROSHA	0.0135554	1.64487	1.10802	2.44181
AAR2	0.0136253	0.607655	0.409052	0.902685
MN1	0.0136317	1.64046	1.10706	2.43087
COL11A1	0.0136892	0.607971	0.409324	0.903024
CTSF	0.0137063	1.63829	1.10641	2.42586
GYPB	0.0137257	0.610261	0.412032	0.903857
ARHGAP19	0.0137354	0.610693	0.41254	0.904025
TBPL1	0.0137385	0.61026	0.41201	0.903905
PRLR	0.0137608	0.610961	0.412821	0.904201
C1RL	0.0137677	1.64068	1.10646	2.43283
KLF5	0.0137704	0.610733	0.412528	0.904168
CCDC71	0.0137928	0.610256	0.411911	0.904108
CLSTN1	0.0138222	1.63747	1.10576	2.42486
BEGAIN	0.0138353	1.63764	1.10573	2.42542
TSSC1	0.0138402	1.64263	1.10639	2.43877
FAM153A	0.0138935	0.608951	0.410159	0.904091
WBP2	0.0139484	0.611348	0.412971	0.905018
TTC26	0.0139828	1.6355	1.10476	2.4212
KLK5	0.0140075	1.63989	1.10525	2.43314
RPL29P7	0.0140503	1.63998	1.10507	2.43381
POU5F1	0.0140922	0.610899	0.412183	0.905417
NAPA	0.0141058	0.610591	0.411787	0.905375
CPA1	0.014187	0.609651	0.41051	0.905396
HIST1H2AJ	0.0142037	1.63824	1.10414	2.43069
ABI2	0.0143149	1.63624	1.10337	2.42646
C1orf216	0.0143241	1.63	1.10249	2.40991
KALP	0.0143378	1.63848	1.10357	2.43268
TPD52L2	0.0143602	0.610955	0.411802	0.906421
DDAH1	0.0143678	1.63458	1.10291	2.42255
AQP9	0.014399	0.610904	0.411676	0.906548
GK	0.01443	1.6316	1.10223	2.4152
IL32	0.0144716	0.611899	0.412764	0.907106
SLC25A37	0.014502	0.611917	0.412735	0.907222
LOC101928747	0.0145233	1.63104	1.10175	2.41461
C2CD2L	0.014611	0.611796	0.412408	0.907582
MRPS27	0.0146866	1.63152	1.1011	2.41745
IRF5	0.01471	0.612716	0.413364	0.908208
LRPPRC	0.0147786	1.63149	1.10069	2.41827
GNA15	0.0148127	1.62929	1.10025	2.41269
SLC35A3	0.0148212	1.63268	1.10066	2.42184
TFR2	0.014876	0.614961	0.415829	0.909453
RP1-181J22.1	0.01488	1.63381	1.10056	2.42545
MAP7	0.0148981	1.62997	1.09997	2.41533
GAD1	0.0149338	0.61418	0.414783	0.909433
CCDC144A	0.0150158	0.612571	0.412691	0.909261
AP2A2	0.0150624	0.613438	0.413671	0.909676
TRIM44	0.0150801	1.62667	1.09876	2.40823
SUPT6H	0.0151197	0.614135	0.414427	0.910079
TAL1	0.0151577	0.615076	0.415515	0.910482
PHYH	0.0152503	1.62705	1.09809	2.41083
NCK1	0.015304	1.62488	1.09758	2.40551
NPRL3	0.0153386	0.615308	0.415508	0.911182
NUDT21	0.0153575	1.62694	1.09762	2.41152
DDX10	0.0153682	1.62596	1.09745	2.40899
HIST1H2AD	0.0154274	1.62884	1.09757	2.41727
IL10RB	0.0154547	0.613839	0.413531	0.911172
GTSE1	0.0154799	0.614127	0.413843	0.911341
HK3	0.0155676	0.616096	0.416109	0.912201
ATG7	0.0155729	0.614883	0.414618	0.911878
SAYSD1	0.0155836	1.62317	1.09619	2.40348
SERPINB2	0.0156253	0.616026	0.415931	0.91238
INTS1	0.0156433	0.614814	0.414423	0.912102
ST3GAL2	0.0156503	0.615159	0.414833	0.912223
CXCR5	0.0156645	0.615861	0.415668	0.912469
AKR1B1	0.0156738	1.62189	1.09565	2.40086
CYP2A13	0.0157532	0.615351	0.414906	0.912632
ALAS2	0.0157919	0.61664	0.416422	0.913125
OBSCN	0.0159222	0.61681	0.416426	0.913617
ENO2	0.0159493	1.62282	1.09464	2.40586
C6orf25	0.0160399	0.617695	0.417328	0.914262
HIST1H4E	0.0160434	1.62211	1.09416	2.40479
PTAFR	0.0160921	0.617287	0.416747	0.914327
HLX	0.016187	1.62015	1.09334	2.4008
CEP131	0.0162291	1.62191	1.09339	2.4059
GTF3A	0.0162443	1.61873	1.09293	2.3975
CD79B	0.0162452	1.61759	1.09278	2.39444
MTMR11	0.0162641	0.617685	0.41697	0.915016
PTK7	0.0162646	1.61617	1.09253	2.39079
RP3-522P13.1	0.0163038	1.62666	1.09367	2.4194
SSB	0.0163469	1.62206	1.09293	2.40736
GATA1	0.0163799	0.619305	0.418781	0.915845
KBTBD11	0.0164024	1.61471	1.0918	2.38807
CDC42EP1	0.0164561	0.617976	0.417034	0.915739
XPNPEP3	0.0164848	1.62181	1.09235	2.4079
MICAL2	0.0165304	0.61827	0.417282	0.916067
ADAM15	0.016531	0.619456	0.418737	0.916389
CCDC94	0.0165895	0.618896	0.41796	0.916432
CBX7	0.0165948	0.618833	0.417875	0.916432
TPM4	0.0166912	1.61579	1.09079	2.39347
CD164	0.0167499	1.61741	1.09076	2.39836
KTN1	0.0168287	1.61709	1.09041	2.39816
POU6F2	0.0169628	0.619144	0.417704	0.917729
RPA1	0.0170076	0.619898	0.418564	0.918076
RASSF8	0.0170097	1.61028	1.08888	2.38137
PPP2R5A	0.0170254	0.620672	0.41949	0.918339
KLC2	0.0170485	1.61479	1.08927	2.39384
IGHA1	0.0171608	0.620246	0.418765	0.918667
GPR63	0.0172014	0.617908	0.415832	0.918183
RIPK1	0.0172364	0.619314	0.417507	0.918667
LHFP	0.0172485	1.61292	1.08828	2.3905
PGPEP1	0.0173391	0.619859	0.418025	0.919143
RPL18AP16	0.0173844	1.61521	1.08803	2.39782
TJP1	0.0173926	0.621502	0.41997	0.919744
TLN1	0.0173999	0.619442	0.417423	0.919231
MAGED1	0.0174502	1.60977	1.08713	2.38368
RORA	0.0175121	0.620893	0.419044	0.919969
SH3GLB2	0.017662	0.621883	0.420046	0.920704
FLNA	0.0176635	0.620615	0.418482	0.920383
TMEM176A	0.0176945	0.620969	0.418872	0.920573
SLITRK5	0.0177069	1.60641	1.08577	2.37671
HIST3H3	0.0177328	1.61176	1.0863	2.39139
FBXO38	0.0179079	1.6084	1.08525	2.38375
RPP25	0.017931	1.60772	1.08508	2.38209
SLC41A3	0.0179718	1.607	1.08485	2.38048
IGFLR1	0.0180228	0.622021	0.419695	0.921883
NAP1L1	0.018054	1.60837	1.0847	2.38485
JUN	0.0180555	1.60964	1.08484	2.3883
HIST1H3A	0.0180733	1.60854	1.08465	2.38547
TSG101	0.0180998	0.620105	0.417224	0.92164
CUEDC2	0.0181047	1.60977	1.08468	2.38907
CDRT1	0.0181766	0.622239	0.419745	0.922421
TNS3	0.018214	1.60472	1.08369	2.37624
CD3D	0.0183877	0.622978	0.420358	0.923266
NCOA2	0.018501	0.621959	0.418939	0.923364
YIPF1	0.0185011	1.5994	1.08204	2.36413
SERPINA1	0.0185611	0.623788	0.421114	0.924006
PPFIBP2	0.018599	0.623979	0.421297	0.92417
H2BFS	0.0186051	1.60518	1.08232	2.38062
SPATA7	0.0186839	1.60326	1.08182	2.37603
ZNF32	0.0187218	1.60261	1.08161	2.37458
POP5	0.0187337	1.6017	1.08146	2.37219
LAMB2	0.018758	1.60264	1.08148	2.37495
CHST2	0.0187651	0.623698	0.420716	0.924612
RAP2C	0.0187688	0.623882	0.420939	0.924668
KLF3	0.0188129	0.624654	0.421833	0.924993
FURIN	0.0188167	0.624292	0.421379	0.924916
NME1-NME2	0.0188496	1.6023	1.08112	2.37474
E2F5	0.0188645	1.60087	1.0809	2.37098
NOP14	0.0188878	1.60226	1.08097	2.37492
UBE2D2	0.0189657	1.59857	1.08029	2.36551
GINS4	0.0191128	0.625504	0.42247	0.926113
TYROBP	0.0191642	0.625935	0.422934	0.926373
SETD1B	0.019244	0.624281	0.420774	0.926215
CAMSAP1	0.019286	0.624946	0.42154	0.926502
GOLGB1	0.0193137	1.60155	1.07939	2.37632
G0S2	0.0194628	0.627164	0.424052	0.927564
SLC2A5	0.0194676	1.60267	1.07897	2.38056
EIF3L	0.0195423	1.59576	1.07796	2.3623
TAF7L	0.0195854	0.626526	0.423092	0.927778
SSPN	0.0196379	1.59449	1.07749	2.35956
CHD4	0.0196922	1.59633	1.0775	2.36499
CLPP	0.019693	1.59807	1.07768	2.36973
FAHD2A	0.0197338	1.59949	1.0777	2.37392
HSPB1	0.0199247	1.59836	1.07692	2.37228
MRC1	0.0199569	1.59669	1.07663	2.36795
ZDHHC3	0.0199719	0.627904	0.424283	0.929246
MYL6B	0.0199763	1.5991	1.07682	2.37471
STYK1	0.0200419	0.626403	0.422323	0.929102
MINPP1	0.0200535	0.627119	0.423197	0.929304
NDUFA1	0.0201391	1.59593	1.07592	2.36725
P2RX4	0.0203001	0.627234	0.42301	0.930053
PITPNM1	0.0203593	0.628809	0.424893	0.930588
EIF3G	0.0204968	1.59506	1.07462	2.36753
EMP1	0.0205497	1.5905	1.07397	2.35544
TPD52	0.0206378	1.5904	1.07367	2.35584
PLBD1	0.0206687	0.629692	0.425586	0.931684
PCBP1	0.0206926	0.627974	0.423413	0.931363
SOBP	0.02078	0.62891	0.424464	0.931827
CTSD	0.0208061	0.630016	0.425811	0.932151
FERMT2	0.0208563	0.630167	0.425933	0.932329
KLRC4-KLRK1	0.0208844	0.628154	0.423386	0.931957
ARID4B	0.02093	1.58983	1.07264	2.3564
PAX7	0.0210042	0.629658	0.425105	0.932637
DIRAS3	0.0210078	1.58757	1.07216	2.35075
ABCF3	0.0211065	0.628762	0.423855	0.932729
ABT1	0.0211108	0.628704	0.423777	0.932728
PMEPA1	0.0211112	1.58614	1.07167	2.34758
MYL4	0.0211532	0.630283	0.425693	0.9332
TNS1	0.0212164	0.630415	0.425776	0.933408
USB1	0.0212616	0.630597	0.425946	0.933577
LOC101930150	0.0212629	1.58311	1.07087	2.34038
RPS28	0.0212814	1.58998	1.0715	2.35933
KIF25	0.0213722	0.629554	0.424499	0.93366
HIST2H2AA3	0.0214704	1.58588	1.07048	2.34941
POLB	0.0214813	1.58485	1.07034	2.34667
GADD45A	0.0215072	1.59277	1.07105	2.36863
XRCC1	0.0215168	1.58771	1.07051	2.35477
F12	0.021603	1.58473	1.06994	2.34719
AHDC1	0.0216685	1.58467	1.06973	2.34751
ITGB7	0.0216838	0.63062	0.425432	0.93477
RCAN3	0.0218892	0.631956	0.426844	0.935632
ADPGK	0.0219013	0.630249	0.424691	0.935298
FAM57A	0.0219052	1.58454	1.06896	2.3488
ZXDA	0.0219212	1.58424	1.06888	2.34808
C18orf32	0.021923	1.58183	1.06863	2.34147
BMP8A	0.0219242	0.630518	0.424999	0.93542
FES	0.0219244	0.631951	0.426793	0.935728
AUTS2	0.021925	1.58097	1.06854	2.33913
LOC647070	0.0221175	1.58676	1.0685	2.35641
ERMAP	0.0221684	0.63337	0.428264	0.936704
UNC119B	0.0221796	1.58005	1.06765	2.33837
ZNF665	0.0221817	1.58253	1.06789	2.34519
UBQLN4	0.022341	1.58478	1.0676	2.35249
FARP1	0.0223542	1.58184	1.06728	2.34448
HSP90AA1	0.0223605	1.5833	1.0674	2.34855
AXIN1	0.0223724	0.631448	0.425599	0.93686
CD300C	0.0224005	0.632401	0.426758	0.937137
AMPD3	0.0224434	0.633935	0.428631	0.937576
MIR4784	0.0225643	1.58084	1.06653	2.34316
CARD8	0.0225879	1.57866	1.06625	2.33733
IL3RA	0.0226806	1.57754	1.06585	2.33487
METTL18	0.0227702	1.57659	1.06549	2.33285
CCDC19	0.0227816	0.633215	0.427306	0.938347
C9orf91	0.0228503	1.57683	1.06527	2.33407
PIGZ	0.0228847	1.57901	1.06537	2.3403
SRP72	0.0229208	1.58077	1.06542	2.34539
XRCC5	0.0229273	1.57519	1.06488	2.33004
FOXF2	0.0229375	0.63424	0.428401	0.938979
PROCR	0.022967	1.58071	1.06527	2.34555
DAD1	0.0229863	1.58094	1.06523	2.34632
CD69	0.0230101	1.58069	1.06514	2.34578
AIPL1	0.0230699	0.635053	0.429262	0.939501
IL25	0.0230985	0.634133	0.428069	0.939391
NSA2	0.0231242	1.57271	1.06405	2.32455
RHD	0.0231405	0.634705	0.428738	0.93962
CD79A	0.0231629	0.634405	0.428332	0.939619
FCER2	0.0231825	0.635496	0.429682	0.939893
RNF2	0.0232021	1.57205	1.06375	2.32323
SPINK2	0.0232636	1.57914	1.06422	2.34322
ZNF573	0.0232982	1.57323	1.06357	2.3271
MAP7D3	0.0233382	1.57323	1.06345	2.32739
AC004692.5	0.0233596	1.58109	1.0641	2.34925
CD8A	0.0233654	0.63493	0.428746	0.940267
FAM214B	0.0234062	0.634838	0.428581	0.940357
SNAPC4	0.0234107	1.57486	1.06338	2.33235
YARS	0.023519	1.5718	1.06278	2.32462
WDR70	0.0235687	1.57386	1.06281	2.33065
CDC25B	0.0238549	0.635865	0.429333	0.94175
SPON1	0.0238805	1.5716	1.06168	2.32641
SQLE	0.0239041	1.56998	1.06147	2.3221
CDC42BPA	0.0239991	0.636853	0.430406	0.942322
TMEM123	0.0240353	1.5751	1.06153	2.33712
SLC39A14	0.0240485	1.57124	1.06115	2.32653
TMSB15A	0.0241215	1.5688	1.06072	2.32023
BCL7C	0.0241538	0.636502	0.429778	0.942659
C7orf69	0.0242124	0.635295	0.428186	0.942579
CORO1A	0.0242442	0.636798	0.430045	0.942952
CTNNAP1	0.0242842	0.635851	0.428802	0.942874
PTK2B	0.0243034	0.636435	0.429516	0.943037
FAM89B	0.0244377	0.637305	0.430455	0.943552
PYROXD1	0.0244518	0.636777	0.429772	0.943488
F2RL1	0.0244818	1.57032	1.0598	2.32677
HIST1H2AE	0.0245163	1.57093	1.05975	2.32868
POTEKP	0.0246477	0.6369	0.429696	0.944019
FRYL	0.0246674	0.637078	0.429898	0.944104
RPP40	0.0246713	1.57031	1.05925	2.32794
BTF3P12	0.0249466	1.56562	1.05806	2.31668
CPSF6	0.0249711	1.56453	1.05789	2.3138
HGS	0.0249784	0.63768	0.430295	0.945017
PPARD	0.0249897	0.637833	0.430475	0.945075
GUCY1B3	0.0250672	1.56657	1.05779	2.32007
CHRNA3	0.0251559	0.637897	0.430362	0.945512
IFNA8	0.0252239	0.639209	0.431945	0.945927
MIR7114	0.0252543	1.5659	1.0572	2.31937
CRABP2	0.0252789	0.63962	0.432402	0.946142
TBC1D22B	0.0253296	0.638763	0.431257	0.946113
PLEKHA5	0.0254054	1.56453	1.05666	2.31652
NPM3	0.025427	1.5678	1.05687	2.32574
PRF1	0.0255264	0.638757	0.431023	0.946611
NARS2	0.0255971	1.5639	1.05607	2.31593
RAB21	0.0256746	0.639215	0.431432	0.947068
TMED9	0.0257201	1.56191	1.05556	2.31116
PRR14L	0.0257586	1.56272	1.05552	2.31365
LHPP	0.0258153	0.639135	0.43117	0.947408
AGK	0.0258197	1.56069	1.05518	2.30839
SOS2	0.02591	0.639622	0.431678	0.947733
ESD	0.0259159	1.55998	1.05485	2.30699
HARS	0.0259365	1.5652	1.05522	2.32166
KAT2B	0.0260118	0.641608	0.434086	0.948339
FHL2	0.026016	0.641484	0.433924	0.948327
CNIH1	0.0261087	1.56192	1.05448	2.31355
RPE65	0.0261789	1.56412	1.05446	2.32011
FTL	0.0262286	0.641464	0.433657	0.948851
ZBED5	0.0262942	1.559	1.05373	2.30654
MRPL16	0.0263157	1.55789	1.05358	2.30358
PNP	0.0264242	0.641963	0.434071	0.949422
SYNJ1	0.02643	0.640912	0.432727	0.949254
ITSN1	0.0264918	0.640867	0.4326	0.949399
FSCN1	0.0264941	1.55968	1.05324	2.30966
VEZT	0.0265438	1.55874	1.05303	2.30733
LPIN2	0.0265674	0.640503	0.432052	0.949523
PPP3CC	0.0265692	1.55704	1.05282	2.30273
TUSC2	0.0266362	0.640947	0.43254	0.949769
S100A1	0.0266756	1.56226	1.05294	2.31794
EMCN	0.0266875	0.642461	0.43441	0.950154
STAT5A	0.0268256	1.55654	1.05209	2.30287
CXCR6	0.0269303	0.640452	0.431581	0.950408
FLNB	0.0269455	0.641092	0.432378	0.950554
HESX1	0.027112	1.55731	1.05137	2.3067
ACTG1P4	0.0271261	1.55395	1.05108	2.29742
UGT2B15	0.0271923	0.64172	0.432903	0.951262
ZMIZ1	0.0273243	1.55279	1.05046	2.29533
DCTPP1	0.0273329	1.55637	1.05071	2.30538
PSAP	0.02757	0.642579	0.43358	0.95232
TRIM9	0.0275862	1.55287	1.04977	2.29708
JAK3	0.0276458	0.641831	0.432544	0.952381
EMC3	0.0276816	0.642954	0.433936	0.952651
MAP3K1	0.0276838	0.642328	0.433135	0.952554
KIF3A	0.0277146	1.55378	1.0495	2.30037
BEND5	0.0277503	1.55358	1.04939	2.3
MFSD12	0.0277694	1.55366	1.04935	2.30035
ZNF571	0.0278391	1.55103	1.04897	2.29339
SV2A	0.0279232	1.55277	1.04888	2.29874
RCVRN	0.027953	0.643615	0.434484	0.953409
COLGALT1	0.0279866	0.643863	0.434764	0.953529
SCN5A	0.0280304	0.644177	0.435117	0.953683
CREB5	0.0280366	0.644099	0.435011	0.953686
YBX2	0.0280521	0.644221	0.43515	0.953742
KIAA1551	0.0280681	0.643043	0.433629	0.953592
HS2ST1	0.0280986	1.55281	1.04842	2.29985
CD52	0.0281393	1.55157	1.04822	2.29663
LRP1	0.0281574	0.643482	0.434091	0.953875
CSNK2A2	0.028184	1.54884	1.04791	2.28924
C6orf48	0.0282125	1.55077	1.04797	2.29481
DXO	0.0282215	1.55418	1.0482	2.30441
LSM7	0.028234	1.55263	1.04805	2.30013
SUCO	0.0282392	0.644669	0.43552	0.954258
YAF2	0.0284157	1.54926	1.04734	2.29173
VAMP1	0.0284304	1.55421	1.04765	2.30569
RXRA	0.0284335	0.644459	0.435042	0.954686
PRKCDBP	0.0284377	1.54839	1.04722	2.28941
CFHR2	0.0285429	1.55	1.04706	2.29452
OTC	0.0285511	1.54872	1.04695	2.29098
ITGA8	0.0286001	1.55007	1.04692	2.29503
B4GALT5	0.0286388	0.64509	0.435628	0.955268
PDZK1	0.0286447	0.643845	0.434028	0.95509
TMC5	0.0286463	0.645512	0.436159	0.955351
RNASEH2B	0.0286663	1.55007	1.04675	2.29542
DPH5	0.0286866	1.55031	1.04671	2.2962
ARHGAP6	0.0286905	0.645505	0.436104	0.955454
PRSS3	0.0287081	1.55225	1.04679	2.30177
CPS1-IT1	0.0288009	0.644534	0.434742	0.955564
ABCD4	0.0288229	1.54803	1.0462	2.29057
FKBP3	0.0288273	1.54862	1.04623	2.29225
TBCA	0.0288304	1.55013	1.04633	2.29651
ABCB6	0.0288382	0.646012	0.436595	0.955878
TLE1	0.0288831	0.646241	0.43684	0.956018
QDPR	0.0289231	1.5508	1.04614	2.29891
IL7R	0.0289468	0.645096	0.435305	0.955993
PGLYRP1	0.0289546	0.646645	0.437282	0.956247
CD82	0.028966	1.54828	1.04585	2.29208
RMND1	0.0289951	1.5489	1.04582	2.29399
NAALADL1	0.0290265	1.54993	1.04581	2.29705
PWP1	0.0290961	1.54728	1.04545	2.28999
P2RY13	0.0291509	0.646166	0.436459	0.956632
TPT1P8	0.0291639	1.54586	1.04518	2.28636
RPL23	0.029209	1.54633	1.0451	2.28796
ANKEF1	0.0292412	1.54569	1.04498	2.28633
IRF9	0.0292541	0.646027	0.436171	0.956851
MICAL1	0.0293384	0.647417	0.437865	0.957254
INSL5	0.029479	0.645493	0.435248	0.957294
GNB2	0.0294894	0.645887	0.435743	0.957377
GTF2I	0.0296091	1.54511	1.04401	2.28672
CCNG1	0.0296778	1.54305	1.0437	2.28131
CDH10	0.0297006	1.54371	1.04369	2.28329
TUG1	0.0297362	1.54183	1.04347	2.27821
NIT2	0.0297434	1.54686	1.04379	2.2924
DNAJC1	0.0297723	1.54472	1.04357	2.28652
FZD7	0.0297954	1.54465	1.04351	2.28647
TNFRSF17	0.0298104	0.646834	0.43662	0.958257
ESPL1	0.0299165	0.648055	0.438078	0.958677
SPATA20	0.0299181	1.54339	1.04312	2.28359
LILRA6	0.0299344	0.646857	0.43652	0.958545
PNRC2	0.0299507	1.54114	1.04289	2.27743
TSSC4	0.0300797	0.64774	0.437502	0.959005
CHKA	0.0300977	0.645928	0.435157	0.958787
DKFZP434C153	0.0301185	1.54262	1.04257	2.28252
MAP4K3	0.0301387	1.54372	1.04259	2.28571
C14orf166	0.0301685	1.54375	1.04252	2.28597
HJURP	0.0302026	0.648126	0.437871	0.95934
RPS15A	0.0302111	1.54332	1.04239	2.28498
NRF1	0.0302217	0.647028	0.43644	0.959228
GNAT1	0.0302251	0.646447	0.435691	0.959154
TMEM176B	0.0302578	0.648168	0.437868	0.959472
SEC61B	0.0304172	1.54547	1.04202	2.29218
CCAR2	0.0304296	0.648446	0.438047	0.959901
MEFV	0.0305179	0.648633	0.438197	0.960127
MYH15	0.0305364	0.649082	0.438756	0.960232
ZNF646	0.0305681	0.647887	0.437185	0.960138
PEBP1	0.0307563	1.54151	1.04093	2.28282
PRPF19	0.0308032	1.54115	1.04079	2.28205
PTPN18	0.0308278	0.648643	0.437891	0.960829
ZNF43	0.0308834	1.54059	1.04056	2.28091
RSL24D1	0.0310601	1.53762	1.03995	2.27344
TMEM208	0.0310661	1.53945	1.04005	2.27863
SH3PXD2A	0.031147	1.53997	1.03989	2.28054
ACOT7	0.0311813	1.54351	1.04002	2.29074
AGMAT	0.0311976	1.53944	1.03973	2.27932
GMFG	0.031244	1.53968	1.03963	2.28025
ZNHIT6	0.0313372	1.5401	1.03943	2.28193
IFT88	0.031406	1.53659	1.03906	2.27235
EFCAB1	0.0314549	0.650089	0.439114	0.962428
ZSCAN18	0.0314961	1.53686	1.03886	2.2736
ZFYVE21	0.0315148	0.651036	0.440277	0.962685
BC069804	0.0315272	1.5358	1.03872	2.27077
PRSS2	0.0315278	1.54321	1.03916	2.29176
HPCAL1	0.0316774	1.53697	1.03843	2.27485
NINJ2	0.0316776	0.652032	0.4414	0.963175
CACNA1S	0.0318656	0.651041	0.439929	0.963462
TPGS2	0.0318721	1.53899	1.03808	2.2816
LOC102724229	0.0319536	1.53577	1.0377	2.27291
DCTD	0.0319603	1.53563	1.03768	2.27253
NAP1L2	0.0320099	0.650658	0.439288	0.963731
HNRNPA1P37	0.0321658	1.53632	1.03723	2.27556
PCNX	0.032196	0.650579	0.439	0.964131
CFLAR	0.0322611	0.65195	0.440708	0.964446
GNL3L	0.0324187	0.651529	0.440005	0.964738
NSUN5P1	0.0324187	1.53517	1.03657	2.27361
MSH4	0.0324406	1.53366	1.03643	2.26943
DOK4	0.0324555	1.53379	1.0364	2.26988
C1orf106	0.0325015	0.651777	0.440245	0.96495
CYAT1	0.0325143	0.648415	0.435889	0.964562
EHBP1	0.0327231	1.53391	1.03579	2.27158
AHSP	0.0327343	0.652644	0.441136	0.965562
MID1IP1	0.0327497	0.652616	0.441085	0.965592
CXCL10	0.0327526	0.651893	0.440145	0.965511
HSPA4	0.0327572	1.53205	1.0356	2.26647
EHD1	0.0328557	0.652696	0.441082	0.965832
CNPY4	0.0328936	0.651813	0.439901	0.965808
HTR3A	0.0329368	0.652429	0.440657	0.965975
VASH1	0.0329463	0.652456	0.440683	0.965999
STON1	0.0330112	1.53149	1.03498	2.26618
TCP11L1	0.0330345	1.53674	1.03521	2.28124
MIR612	0.0330492	1.53167	1.0349	2.26688
ADRA1B	0.0330737	0.653556	0.441983	0.966406
SMC4	0.0330784	1.53454	1.03499	2.27519
CALCRL	0.0330896	1.53156	1.03481	2.26679
LOC101928198	0.0331529	0.651858	0.439704	0.966375
IPO7	0.0331957	1.53092	1.03453	2.2655
HNRNPC	0.0332426	1.53564	1.03467	2.27917
KIF26B	0.0333487	0.654055	0.442361	0.967055
PLAGL1	0.0334104	1.53287	1.03414	2.27213
SIGLEC7	0.0334926	0.652176	0.439782	0.967146
BAALC	0.0335028	1.53071	1.03381	2.26645
CRISP2	0.0336263	0.653858	0.441834	0.967627
ACVR1B	0.0336391	0.653466	0.441312	0.967609
SMARCE1	0.033707	1.52861	1.03323	2.2615
CXCL1	0.0337183	1.5306	1.03331	2.26721
C2orf49	0.0338422	1.52772	1.03288	2.25963
ZC3H15	0.0339178	1.52988	1.03282	2.26616
RNPEPL1	0.033948	0.653725	0.441348	0.968298
ANKRD10-IT1	0.0339862	1.53238	1.03279	2.27362
KIF20A	0.0341191	0.654861	0.442659	0.968788
C5orf45	0.0341613	1.52909	1.03223	2.26514
RAPSN	0.0341713	0.654883	0.442638	0.968901
CSRNP2	0.0341812	1.52652	1.03205	2.25791
LIPA	0.0341923	1.52703	1.03205	2.2594
VNN3	0.0342086	0.655078	0.442855	0.969001
SLC27A2	0.0342363	1.5305	1.03213	2.26951
LOC101930578	0.0343011	1.52729	1.03182	2.26069
ERCC1	0.0343712	1.52777	1.03169	2.26238
NDC80	0.0344452	0.65452	0.441901	0.96944
KATNB1	0.0344571	1.52592	1.0314	2.25753
RTCA	0.0344648	1.52625	1.0314	2.25853
HNRNPA0	0.0344749	1.5248	1.03131	2.25444
MAPK1	0.034531	0.655319	0.442859	0.969707
PRC1	0.0345694	0.654437	0.441673	0.969693
WNK1	0.0346202	0.65596	0.443609	0.969964
TPM1	0.0346429	0.656037	0.443687	0.970019
RPL10A	0.034645	1.52286	1.03083	2.24974
RPS4XP2	0.034703	1.52439	1.03078	2.25438
MTHFD2	0.0347518	1.52458	1.03068	2.25516
ARHGAP15	0.034806	1.52473	1.03056	2.25584
SPTA1	0.0348147	0.656456	0.444069	0.970423
LOC100293211	0.0348182	0.656643	0.44431	0.97045
CLDND1	0.0349291	1.52435	1.03027	2.25536
RPS25	0.0349401	1.52726	1.03039	2.26373
N4BP2L1	0.0349491	1.52217	1.03012	2.24923
ZXDB	0.0350501	0.655894	0.443111	0.970856
ANKRD6	0.0350695	1.5216	1.02983	2.2482
RANBP3	0.0351664	0.656027	0.443174	0.971112
FBXO9	0.0352848	0.655979	0.442999	0.971354
IMPDH2	0.0353434	1.52289	1.02929	2.25319
ZNF512B	0.0353562	1.5233	1.02928	2.25444
SNTB2	0.035375	0.654779	0.44135	0.97142
C21orf33	0.0354707	1.52405	1.02906	2.25712
TMEM11	0.0354812	0.655719	0.442473	0.971736
HMGN1	0.0354907	1.52146	1.0289	2.24983
RPGRIP1L	0.0356104	1.52355	1.02873	2.25637
RWDD1	0.0356272	1.51977	1.02853	2.24564
APEX1	0.0356516	1.52107	1.02853	2.24948
ZAP70	0.0356523	0.655639	0.442207	0.972083
ARHGAP32	0.0356951	1.52682	1.0287	2.26615
GPR183	0.03573	0.656107	0.442745	0.972291
RPL12	0.0357324	1.51946	1.02828	2.24526
CDH1	0.0357773	0.657368	0.444347	0.972513
LY6G6C	0.0359047	0.657455	0.444341	0.972784
CNGB3	0.0360863	0.656408	0.442802	0.973056
SEPHS1	0.0361211	1.51891	1.02742	2.24554
CTDP1	0.0361809	0.655341	0.441322	0.973149
SVIL	0.0361836	1.52028	1.02734	2.24975
HEXIM1	0.0362396	0.657841	0.444532	0.973508
HILPDA	0.0362653	1.521	1.0272	2.25219
F2R	0.0363447	1.52159	1.02705	2.25427
POLR3D	0.0364223	1.51809	1.02673	2.24459
C22orf29	0.0364398	0.657265	0.443592	0.973863
UPF1	0.0364506	0.657413	0.443775	0.973899
ADCK3	0.0364605	1.51973	1.02672	2.24949
TRABD	0.0364886	0.658584	0.445272	0.974086
PARP2	0.0365029	1.51989	1.02664	2.25013
SCARA3	0.0365466	1.51986	1.02654	2.25025
FBXO5	0.0366745	0.65929	0.446024	0.974528
ERCC5	0.0367244	1.51875	1.02611	2.2479
CTTN	0.0367806	0.658433	0.444802	0.974665
KRT84	0.0368601	1.52066	1.0259	2.25403
HIST1H2AC	0.0369142	1.5195	1.02574	2.25094
NUBPL	0.0369357	1.51635	1.02556	2.242
CHST8	0.0369446	0.659727	0.446348	0.975114
PHC2	0.0369524	0.658079	0.444181	0.974982
PRR16	0.0369601	1.51553	1.02548	2.23977
ZCCHC24	0.0369619	0.657912	0.443953	0.974986
C22orf31	0.0370081	0.659003	0.445339	0.975178
MIR1236	0.0370274	1.51886	1.02547	2.24965
TM4SF20	0.0370938	0.659204	0.445524	0.975369
APP	0.0370999	1.5186	1.02531	2.24922
FLOT2	0.0372106	0.659546	0.445865	0.975634
ZNF254	0.0372422	1.51927	1.02503	2.25183
PRPS2	0.0372904	1.51588	1.02479	2.24231
DEFA1	0.0372985	0.659675	0.445954	0.975822
DUSP2	0.0373036	1.51915	1.02489	2.25175
C1orf27	0.0373344	1.51609	1.02471	2.24312
MPP1	0.0373755	0.659752	0.445984	0.975984
DDX27	0.03738	1.51412	1.02453	2.23766
CDA	0.0374	0.660081	0.446393	0.976061
TESK1	0.0374201	1.51419	1.02445	2.23804
IMPDH1	0.0374263	0.65829	0.44402	0.97596
RGS20	0.037492	0.659122	0.44505	0.976164
FZR1	0.0375298	0.659228	0.445154	0.976249
ARHGAP22	0.0375582	1.51684	1.02427	2.2463
GPR65	0.0375605	0.660035	0.446186	0.976379
SDCBP	0.0375721	0.659473	0.445437	0.976354
CXCL9	0.0376487	0.660558	0.446791	0.9766
TRAF4	0.0376756	1.51696	1.02402	2.24717
GBF1	0.0377359	0.658822	0.444434	0.976628
STARD3	0.037739	0.660512	0.446649	0.976776
HEMK1	0.0377489	1.51658	1.02385	2.24642
KCND1	0.0378101	1.51851	1.0238	2.25226
DYNLT3	0.0378712	1.51463	1.02352	2.24137
NMT2	0.0378818	0.659629	0.445359	0.976988
DNAJC12	0.037882	1.51624	1.02356	2.24606
GRTP1	0.0379069	0.661231	0.447441	0.97717
CUTA	0.0381009	1.51444	1.02304	2.24189
DGKB	0.0381447	1.51161	1.02284	2.23393
PPP2R5C	0.0382749	1.51316	1.02263	2.239
OAZ1	0.0382871	0.661216	0.447076	0.977923
RAB11A	0.0383005	1.51367	1.0226	2.24058
HMGCL	0.0384113	0.660072	0.44546	0.978079
ZNF273	0.0384181	1.51434	1.02238	2.24302
NOL12	0.0384405	0.660828	0.446427	0.978196
AP3M2	0.0384542	1.51192	1.02221	2.23622
MMP12	0.0384659	1.51296	1.02223	2.23927
MARK1	0.0384888	0.660328	0.445727	0.978252
CNPPD1	0.0385883	0.661512	0.447194	0.978542
CTRL	0.0385997	0.661291	0.446893	0.978547
EMR3	0.0386058	0.661086	0.446617	0.978543
VKORC1	0.0386291	1.51394	1.02192	2.24284
ARRB2	0.0386527	0.66141	0.447002	0.978661
MAGEA9	0.0387729	1.5129	1.02159	2.2405
UBA2	0.0388085	1.51091	1.02145	2.2349
LAMA2	0.0388558	0.662191	0.447849	0.97912
TMED10	0.0388801	1.50999	1.02127	2.23258
ENGASE	0.0389051	1.50905	1.02119	2.22998
ZNF230	0.0389167	1.51011	1.0212	2.2331
ANKRD26	0.0389941	1.50873	1.02099	2.22945
TMBIM4	0.0390752	1.5145	1.02102	2.24648
NUP62	0.0391104	0.661569	0.4468	0.979573
WARS	0.0391489	0.660989	0.446002	0.979606
HIST1H2AL	0.0391546	1.51418	1.02085	2.2459
RPS10L	0.0393287	1.51275	1.02045	2.24255
MTERF4	0.0394675	1.51039	1.02009	2.23636
PRICKLE4	0.0395688	1.50964	1.01986	2.23464
TRMT61B	0.0396228	1.50736	1.01967	2.22829
ATXN2L	0.0396316	0.663139	0.448406	0.980703
HIST1H3C	0.0396774	1.50864	1.01961	2.23223
MYH1	0.0396907	0.662049	0.446916	0.980742
BC069004	0.0397434	1.51217	1.01958	2.24275
RABEPK	0.0398657	1.51114	1.0193	2.24029
PIP4K2C	0.040053	0.663155	0.448055	0.98152
TTC3	0.0402467	1.5064	1.01839	2.22825
AURKAIP1	0.0402707	0.663392	0.448175	0.981957
CD247	0.0402722	0.663346	0.448114	0.981956
HNRNPA1P31	0.0402989	0.663236	0.447945	0.982001
BTF3P13	0.0403298	1.50653	1.01823	2.22899
RAB3GAP2	0.0405034	0.664201	0.449041	0.982457
APPL1	0.0405493	1.50451	1.01773	2.22409
MARK2	0.0405666	0.663434	0.447972	0.982529
LINC00260	0.0406292	0.665106	0.450129	0.982755
SCGB1A1	0.0406495	0.664408	0.449187	0.98275
KIR2DL2	0.0406573	0.664312	0.449052	0.982759
SLC39A6	0.0406669	1.50509	1.01752	2.2263
ABHD5	0.0406845	0.664644	0.449469	0.982831
DNAJC24	0.0407139	1.50289	1.01736	2.22014
CALM1	0.0407149	0.665298	0.450309	0.98293
BPGM	0.0407677	0.665003	0.449872	0.983013
AREL1	0.0409494	0.662926	0.446965	0.983233
COMP	0.0410436	0.665314	0.450042	0.983557
PARP8	0.0410475	0.664564	0.449046	0.98352
CYP2F1	0.0411032	0.664789	0.449295	0.983639
POLL	0.0411578	0.664408	0.448743	0.983721
HSPE1	0.041186	1.50492	1.01649	2.22804
PTPRE	0.0412618	0.664342	0.448566	0.983915
XPA	0.0413155	1.50127	1.01614	2.21801
AIM1	0.0413537	0.664665	0.448913	0.984108
FCER1G	0.0413575	0.665277	0.449721	0.984151
MAST4	0.0414157	1.50344	1.016	2.22475
UGDH	0.0414975	1.50378	1.01585	2.22608
LOC101928789	0.041615	0.666157	0.450665	0.984688
ITM2C	0.0417436	1.50243	1.01533	2.22321
MIR7109	0.0417701	0.664973	0.448961	0.984915
FAM63B	0.0417894	1.50147	1.01522	2.22061
PRR34	0.0417907	1.50298	1.01525	2.22501
CYTL1	0.0418089	1.50435	1.01525	2.22908
NDUFA6	0.0418869	1.50279	1.01506	2.22486
LOC101928457	0.0419086	0.666486	0.45085	0.985259
PPWD1	0.0419335	1.49984	1.0149	2.21649
MAPK4	0.0419515	0.665715	0.449789	0.985298
CHMP1A	0.0419754	0.664841	0.44861	0.985296
MLX	0.0420614	0.664653	0.448287	0.985449
LPAR3	0.0421246	1.50296	1.01461	2.22637
PARN	0.0421996	1.50005	1.01439	2.21823
GALNT14	0.042211	1.49792	1.01432	2.21209
ICOS	0.0422478	0.666249	0.450244	0.985883
GABRA4	0.0422713	0.666124	0.450058	0.985921
CHFR	0.0422836	0.666669	0.450771	0.985972
CCNB2	0.0423832	0.667077	0.451228	0.986179
APOBEC3B	0.0423927	0.667149	0.451316	0.986201
EXOC1	0.0423927	1.50005	1.01402	2.21904
C16orf80	0.0424269	1.49943	1.01394	2.21737
SLC38A1	0.0424357	1.49872	1.01391	2.21535
TMCC2	0.0424729	0.667155	0.451256	0.986351
ARF4	0.0425131	0.665007	0.448369	0.986318
HDC	0.042514	0.667624	0.451843	0.986451
CSTF2T	0.042624	1.49661	1.0135	2.21002
CD19	0.0426589	0.667206	0.451164	0.9867
CDADC1	0.0426902	1.49691	1.01338	2.21116
C2orf68	0.0427571	1.4984	1.01328	2.21577
HIST1H2AB	0.0427628	1.50318	1.01338	2.22973
TNPO1	0.0427817	1.49966	1.01326	2.21953
ZFAND5	0.0429083	0.667379	0.451182	0.987172
RHOG	0.0429267	0.666644	0.45019	0.987172
MTRF1L	0.0429289	1.50016	1.01299	2.22162
GNB2L1	0.0429467	1.49829	1.01292	2.21623
GLMN	0.0430061	1.49686	1.01278	2.21232
DMTN	0.043032	0.667519	0.451264	0.987408
CDIP1	0.0431653	1.49749	1.01249	2.21482
MED27	0.0432182	1.49627	1.01236	2.21148
CNN3P1	0.043221	1.49834	1.0124	2.21752
PTBP3	0.0433146	1.49727	1.0122	2.21481
NFYB	0.043346	1.49646	1.01212	2.21256
CHSY1	0.043398	0.66762	0.451088	0.988091
PLCXD1	0.0436695	1.49492	1.01148	2.20941
FRMD4B	0.0437404	1.4958	1.01137	2.21227
ZNF7	0.0437988	1.49743	1.01129	2.21726
RABGAP1L	0.0438552	0.668574	0.451975	0.988973
ATP8B1	0.0438978	1.49812	1.01111	2.21969
DNMT3B	0.0439826	1.49696	1.01093	2.21666
MGAT3	0.0441182	0.66859	0.451776	0.989456
PSG2	0.0441302	0.66925	0.452647	0.989503
UBXN4	0.0441703	1.49393	1.01053	2.20857
SRSF3	0.0441993	1.49529	1.0105	2.21265
PODNL1	0.0442788	1.49622	1.01037	2.21572
THOC2	0.0442966	1.49401	1.01029	2.20931
HYAL4	0.0443201	0.66859	0.451608	0.989825
IFI16	0.0443489	1.49391	1.0102	2.20923
CORO2A	0.0443703	0.669224	0.452412	0.989941
SLC33A1	0.0444539	1.49216	1.00997	2.20457
GRB2	0.044465	0.669077	0.452137	0.990108
MEA1	0.0445845	1.49772	1.00982	2.22137
ZKSCAN1	0.0446211	1.49357	1.00968	2.20936
VAMP3	0.0447098	0.669646	0.452692	0.990574
PPID	0.0447212	1.49233	1.00948	2.20614
HAPLN1	0.0448096	0.67018	0.453324	0.990773
KCNJ15	0.0448524	0.669766	0.452734	0.990837
MBOAT7	0.0449844	1.49222	1.00899	2.20687
CHP2	0.0451624	0.669457	0.452065	0.991388
RHCE	0.0452009	0.670151	0.452961	0.99148
MYO1B	0.0452719	1.49138	1.00845	2.20558
AMELX	0.0454678	0.671535	0.454595	0.992002
KRT37	0.0455205	1.49151	1.008	2.20695
HLA-DRB6	0.0455233	0.671184	0.45408	0.992092
ATP1A3	0.0455788	0.670183	0.452693	0.992162
SLC6A8	0.0456483	0.670591	0.453182	0.992299
DCUN1D4	0.0456925	1.48838	1.00764	2.19848
TGDS	0.0458411	1.48986	1.00739	2.2034
LOXL1	0.0458695	1.49251	1.00737	2.21129
MYO18A	0.0459903	1.48886	1.00711	2.20107
RPL22P22	0.0460613	1.49175	1.00702	2.20981
PLEKHB1	0.0461868	1.48993	1.00677	2.20497
PTEN	0.0462323	0.672193	0.454852	0.993386
SMU1	0.0462446	1.48878	1.00665	2.20183
DRD3	0.0462813	0.671567	0.453972	0.993457
SYNJ2BP	0.0463497	1.48717	1.00644	2.19752
TET3	0.0464041	0.670312	0.452191	0.993647
ACTB	0.0464703	0.669714	0.451338	0.993751
LOC100289097	0.0465192	1.48806	1.00615	2.20079
HOOK2	0.0465474	1.48983	1.00611	2.2061
LGALS4	0.0465753	1.49099	1.00608	2.20964
SFT2D3	0.0465758	1.48723	1.00604	2.19858
ANO3	0.0466398	0.670832	0.452696	0.994079
OR10C1	0.0466411	0.671363	0.453406	0.994093
NSMAF	0.0466974	1.48842	1.00583	2.20255
BEX4	0.0466999	1.48814	1.00582	2.20174
MFSD11	0.0467057	1.4896	1.00583	2.20604
VIPAS39	0.0467175	1.48553	1.00577	2.19415
GNRH2	0.0467365	0.671557	0.453589	0.994267
MTSS1	0.0468017	0.670642	0.452311	0.994364
C11orf30	0.0468155	0.671803	0.453856	0.994413
PSG3	0.0468392	0.671966	0.454055	0.994458
MIIP	0.0468984	0.67313	0.455571	0.994586
IQGAP2	0.0468985	1.48806	1.00547	2.20229
VTCN1	0.0469028	0.67213	0.454223	0.994574
KIAA0430	0.0469163	0.671895	0.453896	0.994593
PC	0.0469373	0.672732	0.455003	0.994647
CD34	0.0470649	1.48829	1.00517	2.2036
MUC6	0.0470744	0.672496	0.454576	0.994885
SLC35G2	0.0470968	1.48743	1.00511	2.20122
DNAJB1	0.0471647	0.672636	0.454691	0.995047
PPP6C	0.0471672	0.671866	0.453655	0.995037
HBZ	0.0471758	0.673683	0.45609	0.995085
EPHA1	0.0472524	0.672788	0.454825	0.995204
SEC14L5	0.0472658	1.48668	1.0048	2.19967
GPR3	0.0472727	1.48755	1.00479	2.20225
ADD1	0.0473075	0.672066	0.453811	0.995288
ZYX	0.0473166	0.671998	0.453712	0.995303
ZNF682	0.0475134	1.48687	1.00436	2.20119
DUSP22	0.04752	1.48664	1.00435	2.20053
DENND4C	0.0475772	1.48253	1.00421	2.18867
SYPL1	0.0476615	1.48608	1.00409	2.19944
DYRK1B	0.0476819	0.672716	0.454384	0.995958
PPP2R5E	0.047715	1.48591	1.004	2.19915
ZNF234	0.0477308	0.672296	0.45378	0.996038
MFN2	0.0477311	0.673616	0.455555	0.996058
TRA2B	0.0477791	1.48742	1.00389	2.20384
NID2	0.0477999	0.673819	0.455773	0.996182
SGSM3	0.0479039	1.48513	1.00366	2.19756
CMA1	0.04796	1.48431	1.00355	2.19538
ADAM19	0.0479737	0.673364	0.455022	0.996479
SLMO1	0.0479926	1.48378	1.00349	2.19394
CDC34	0.0480848	0.673546	0.455178	0.996676
BLVRB	0.0480899	0.674318	0.456213	0.996694
H6PD	0.0481127	0.672442	0.453671	0.996711
RP6-11O7.2	0.0481253	1.48408	1.00326	2.19534
IL1RAP	0.0481679	1.48444	1.00319	2.19656
C5orf22	0.0482169	0.673433	0.45492	0.996905
HIST1H3G	0.0482414	1.48491	1.00306	2.19824
ATG9A	0.0482468	0.673541	0.455041	0.996959
PCSK7	0.0482799	0.674671	0.456537	0.997029
AZGP1	0.0482844	0.674493	0.456294	0.997035
TPRKB	0.0483827	1.48485	1.00281	2.1986
MYH2	0.0484965	1.48058	1.00259	2.18644
CBX4	0.0485698	0.67504	0.456805	0.997535
NQO1	0.048643	1.48339	1.00235	2.19528
PNPLA4	0.0486689	0.674371	0.455824	0.997701
PIP4K2A	0.0487713	0.674929	0.456495	0.997883
E2F1	0.0487846	0.675813	0.457678	0.997913
AF090939	0.0488031	0.674216	0.455509	0.997933
PKNOX1	0.048806	1.48031	1.00206	2.18683
INTS8	0.048844	1.4814	1.00199	2.19019
HIST1H4D	0.0490988	1.48268	1.00156	2.19494
LRRFIP1	0.0491061	1.48275	1.00154	2.19516
PCDHA10	0.049108	0.674455	0.45559	0.998462
LIN7B	0.0491549	1.47991	1.00145	2.18696
GOLGA7	0.0492143	1.47805	1.00135	2.18169
TTC37	0.0492191	1.48105	1.00134	2.19057
LGALS7	0.0492241	0.675614	0.457063	0.998669
F10	0.0493536	0.675168	0.456359	0.998889
PAQR3	0.0493781	1.48183	1.00107	2.19346
ATP5I	0.0494107	1.48109	1.00101	2.19141
PRKAB1	0.0494788	0.675889	0.457233	0.999107
PPFIBP1	0.0494809	1.47854	1.00089	2.18415
RPL23AP32	0.049489	1.48113	1.00088	2.19182
SLC22A4	0.0495086	0.675644	0.456879	0.999158
FCAR	0.0495747	0.675776	0.457006	0.999271
CLDN16	0.0496326	1.48093	1.00063	2.19176
ZZZ3	0.0496545	1.48015	1.00059	2.18955
UCKL1	0.0496875	1.47855	1.00053	2.18494
ALKBH4	0.0497379	0.674454	0.455093	0.999549
KLHDC2	0.0498211	1.48001	1.00031	2.18977
CHP1	0.0498301	0.675295	0.456156	0.999709
INVS	0.0499602	1.47889	1.00007	2.18697
CFH	0.002494	1.85016	1.24172	2.75672
XCL1	0.00432909	0.563262	0.379718	0.835527
NCF1	0.0173108	0.620672	0.419068	0.919264
EPOR	0.0229522	0.634979	0.429313	0.93917
TRAC	0.0340842	0.65299	0.440261	0.968506

## Sheet: Table S2-HG-U133 plus 2.0
Gene Symbol	P value	HR	Low 95%CI	High 95%CI
MBNL2	2.11287e-05	0.234142	0.119918	0.457169
C3orf52	4.94643e-05	0.250248	0.128174	0.488584
DNAJB8	0.00011091	0.264858	0.135036	0.51949
PTPLAD2	0.000214637	3.42721	1.78509	6.57996
CRYBB2	0.000232554	0.282565	0.144159	0.553851
CNKSR2	0.000268989	3.3946	1.75896	6.55118
THBD	0.000302553	3.29757	1.72621	6.29933
EPB41L2	0.000317065	3.29282	1.72131	6.29906
TRIB2	0.000479529	0.312763	0.162888	0.600541
LAMC1	0.000486337	3.15303	1.65386	6.01117
KHDC1L	0.000530667	3.15858	1.64793	6.05404
LOC100287728	0.000556804	0.312904	0.161772	0.605228
TUBB1	0.000585904	0.325195	0.171407	0.616965
KLRC4-KLRK1	0.000589022	0.322827	0.169405	0.615195
CTTN	0.000663504	0.328802	0.173306	0.623816
TAC3	0.000759072	0.326284	0.170012	0.626197
MUM1L1	0.000932436	0.325192	0.167215	0.632418
NR2F2-AS1	0.000937054	0.335672	0.175829	0.640827
RPL39L	0.000998413	2.89233	1.53656	5.44436
CNTNAP2	0.00101704	0.336722	0.175909	0.644546
MFI2	0.0010293	2.90073	1.53581	5.47868
IL17C	0.0010829	0.333098	0.172282	0.644024
PLCB1	0.00119113	2.90841	1.52498	5.54687
PDE6A	0.00120341	0.343614	0.179995	0.655966
ZNF154	0.00120803	2.87247	1.5163	5.44158
DHRS2	0.00122801	0.33656	0.173895	0.651384
LOC101927018	0.0012524	0.343096	0.17915	0.657077
GDE1	0.00128254	0.350717	0.185339	0.663662
LRFN4	0.00128492	2.87539	1.5116	5.46961
SLC22A8	0.00131266	0.346638	0.18164	0.661514
SMARCA1	0.00133967	2.84652	1.50207	5.39436
ALCAM	0.00139416	2.86065	1.50149	5.45013
ACRC	0.00139894	0.347761	0.181915	0.664802
RGMB	0.00142138	0.348589	0.182445	0.666033
GRIN2D	0.00164959	2.77359	1.46931	5.23565
INPP5K	0.00173033	0.364907	0.194217	0.685608
MOB1B	0.00176471	0.361549	0.191095	0.684043
RBM28	0.00198882	2.72566	1.44353	5.14658
LOC100506113	0.00198949	2.692	1.43695	5.04326
H1FX-AS1	0.00203278	2.76187	1.44855	5.26589
LRRN3	0.00205569	0.367177	0.194164	0.694356
NANS	0.00211917	2.69284	1.4316	5.06524
RECK	0.00217226	2.69842	1.43049	5.09019
PLLP	0.00222171	0.370873	0.19643	0.700234
TLX1	0.00225269	0.365931	0.191985	0.697477
TCTEX1D1	0.00225812	2.68361	1.42423	5.05659
CCR10	0.00226125	0.372062	0.197248	0.701809
RP11-77H9.8	0.00233665	0.375171	0.199554	0.705339
TSHZ2	0.00236874	0.372222	0.196813	0.703965
WDSUB1	0.00240814	2.64023	1.41033	4.94271
CCDC94	0.00246831	0.368064	0.192699	0.703018
RFPL1	0.00248683	0.36954	0.19388	0.70435
PITX3	0.00254072	0.375219	0.198544	0.70911
ZER1	0.00256313	0.376177	0.199268	0.710142
C11orf94	0.00275716	0.37876	0.200591	0.715184
RFC5	0.00280971	2.68707	1.40501	5.139
LEF1	0.00284067	0.383264	0.204161	0.719488
TRAT1	0.00286787	0.378582	0.199921	0.716905
LHX1	0.00288449	0.375692	0.197323	0.715299
HELB	0.0029127	2.59079	1.38428	4.84888
UNKL	0.00291642	0.384706	0.205087	0.721641
NECAP2	0.00295955	0.36792	0.19027	0.711439
GGH	0.00300184	2.62115	1.38705	4.95325
CTAGE11P	0.0030154	0.384364	0.20434	0.722993
PAX5	0.0030542	0.383083	0.203039	0.722783
LOC440570	0.0030983	0.377987	0.198379	0.720207
ZBTB4	0.00317378	0.377746	0.197847	0.721223
RP11-66N11.7	0.00320916	0.379053	0.198839	0.7226
LSM6	0.00329314	2.57092	1.36963	4.82584
FLJ35816	0.00331182	0.384196	0.202922	0.727404
RP11-366L5.1	0.00334654	2.59056	1.37163	4.89273
LOC100133669	0.00336749	0.386216	0.204475	0.729491
BACH2	0.00341938	0.386581	0.204587	0.730472
TBATA	0.00347339	0.386831	0.20459	0.731404
FAM124B	0.00352018	2.5556	1.36085	4.79928
SLFN5	0.00353063	0.387968	0.205368	0.732924
SERPINB1	0.00355344	2.5797	1.36418	4.87829
GPI	0.00364793	2.57079	1.36019	4.85883
IGLV4-3	0.0036921	0.390706	0.207166	0.736853
PNRC1	0.00370694	0.387838	0.204569	0.735295
RP11-567C2.1	0.00370998	0.389577	0.206096	0.736405
GRIK1	0.00372531	0.383997	0.201117	0.733176
AFP	0.00379579	0.385157	0.201871	0.734855
ERICH1-AS1	0.00379728	2.52325	1.34829	4.72215
RAX	0.00385329	0.38755	0.203765	0.737099
ENAH	0.004004	2.54358	1.34684	4.80369
PCDH9	0.00406096	0.393427	0.208218	0.74338
LOC101929662	0.00411146	0.39329	0.207915	0.743942
ZG16	0.00412589	0.388157	0.203318	0.741036
DUS3L	0.00416456	2.50851	1.33725	4.70564
AK021804	0.00421642	0.394637	0.208745	0.74607
PCED1B	0.004224	0.400021	0.213539	0.749355
GCK	0.00423145	0.389835	0.204431	0.743386
SAA3P	0.00429301	0.395477	0.209228	0.747519
C1RL	0.00429634	2.51706	1.33577	4.74304
STARD13-AS	0.00453502	2.51446	1.33022	4.75298
NAA38	0.00458146	2.48435	1.32432	4.6605
FAM171B	0.0046308	2.49954	1.32579	4.7124
BDNF-AS	0.00465623	0.40025	0.21228	0.754663
AC074212.6	0.0046798	0.394843	0.207372	0.75179
PCDHA10	0.00471984	0.400378	0.212188	0.755473
ISX	0.0047562	2.49947	1.32324	4.72124
DQ594366	0.00477039	2.49191	1.32173	4.69808
UQCRC1	0.00481203	2.45637	1.31513	4.58796
C16orf82	0.00495217	0.398832	0.210066	0.757225
RP11-155O18.6	0.00496507	0.396604	0.208038	0.756088
CTD-2130O13.1	0.00502058	2.46667	1.3128	4.63474
NETO2	0.00504161	2.45558	1.31062	4.60079
YIPF6	0.00504604	0.406111	0.216321	0.762412
AMIGO2	0.00505997	0.405899	0.216087	0.762445
LOC221946	0.00507713	2.47731	1.31343	4.67256
ABCD3	0.00517366	2.44986	1.30725	4.59118
APOC1	0.00517841	0.40698	0.216701	0.764338
CCDC71	0.00520094	0.404346	0.214253	0.763099
GRIN2B	0.00521246	0.404279	0.214157	0.763185
RASGRP1	0.00529505	0.408583	0.217801	0.766478
AK021977	0.00532299	0.398081	0.208272	0.760872
ECHDC3	0.00532639	2.43668	1.3024	4.55884
LOC101930566	0.00532665	2.4763	1.30864	4.68583
ITLN1	0.00538071	0.408552	0.217517	0.767363
CELA3B	0.00538595	0.405071	0.214353	0.765479
MYO5B	0.00553223	0.411632	0.219872	0.770635
KLHL13	0.00554044	2.43306	1.29807	4.56044
ITGA2	0.00564945	2.44747	1.29844	4.61332
GSDMD	0.00572342	2.41397	1.29199	4.51031
RP11-112L7.1	0.00575076	0.402747	0.211214	0.767967
PURB	0.00577492	0.409852	0.217556	0.772118
NPY1R	0.00598253	0.410681	0.21773	0.774626
XPO7	0.00603852	0.414576	0.221124	0.777269
UCP2	0.00605972	0.411456	0.218222	0.775797
ROBO3	0.00608988	2.43423	1.28909	4.59662
ASH1L-AS1	0.00616869	0.412237	0.218636	0.777269
RP11-353N14.1	0.00622996	0.413182	0.219332	0.77836
BMP8A	0.00633221	0.413649	0.219485	0.779577
MUC3	0.00638231	0.413719	0.219416	0.780085
TCRA	0.00644106	0.410471	0.21631	0.77891
MROH7	0.00646054	2.39213	1.27699	4.48107
CD2	0.00646172	0.417038	0.222241	0.782578
GTPBP2	0.00646411	0.409027	0.214944	0.778357
MARVELD1	0.00652853	2.40813	1.27835	4.5364
PCGF1	0.00657217	0.414724	0.219837	0.782379
BBC3	0.00659437	0.415184	0.220199	0.782825
FGB	0.0066597	0.409857	0.215192	0.780619
AATF	0.00666046	2.37011	1.27075	4.42058
DNAJB4	0.00667325	0.415161	0.219976	0.783534
BLOC1S6	0.00676874	0.418717	0.222987	0.786251
PHGR1	0.00679373	0.416926	0.221283	0.785545
SERPINH1	0.0068094	2.37453	1.26925	4.44228
FAIM3	0.00687661	0.419612	0.223536	0.787676
CD6	0.00688286	0.421291	0.225066	0.788596
RP11-96H17.1	0.00694586	0.417486	0.221413	0.787193
CDC34	0.00698415	0.421548	0.225049	0.789619
ABRACL	0.00698896	2.34982	1.26309	4.37156
DOCK9	0.007096	0.422368	0.225527	0.791012
BACE1	0.00716595	2.38967	1.26642	4.50919
RPS6KA2-AS1	0.00719226	0.413227	0.216926	0.787165
NXPH4	0.00719729	0.417905	0.221178	0.789612
RBCK1	0.00727677	2.34552	1.25854	4.37132
GTPBP1	0.00735266	0.420659	0.223329	0.792349
DCAF8	0.00736049	0.423632	0.226049	0.793917
BAP1	0.0074337	0.425539	0.227638	0.795491
DUSP16	0.00760476	0.424765	0.226515	0.79653
FLJ31713	0.00773809	0.415522	0.217726	0.793008
TCEB2	0.00775171	0.423043	0.224581	0.796886
TMEM225	0.00787369	2.33164	1.24881	4.35337
DSCC1	0.00789793	2.347	1.25066	4.40439
TSPAN7	0.00794298	0.42664	0.227465	0.80022
LEPROT	0.0079703	0.426399	0.227179	0.800321
HBG1	0.00805054	0.429061	0.229467	0.802263
NOS2	0.00812823	0.425115	0.225634	0.800957
GPATCH11	0.00819966	2.35943	1.2486	4.45854
BCL11B	0.00825978	0.430793	0.230608	0.804751
TMEM101	0.00831123	2.29233	1.23799	4.2446
SERPINB6	0.00834136	2.34271	1.24457	4.40978
TM4SF5	0.00836605	0.426138	0.226049	0.803334
BC015159	0.00842299	0.425861	0.225669	0.803646
ANKRD13D	0.00845363	2.37899	1.24811	4.53454
RNF121	0.0085933	0.426752	0.226121	0.805396
DDX28	0.00860014	2.32493	1.23907	4.36241
FAM109A	0.00878205	0.422193	0.221518	0.80466
MORN3	0.00882815	0.428245	0.227	0.807901
NAP1L4	0.00885796	0.433083	0.23144	0.810411
THOC5	0.00889887	2.29065	1.23101	4.26241
LPO	0.00891258	0.428971	0.227495	0.808882
LRFN2	0.008944	0.429719	0.228122	0.809471
ACKR3	0.00895843	2.30529	1.2323	4.31254
LINC00298	0.00897054	0.427216	0.225747	0.808488
NAV3	0.00902349	2.30468	1.23149	4.31309
TBX21	0.00908247	0.433535	0.231386	0.812288
SLC25A21-AS1	0.00912947	0.429307	0.227351	0.810659
NUTM2B	0.00917493	0.43562	0.233146	0.813934
PPOX	0.00919915	0.433336	0.230957	0.813052
ADAMTSL4	0.00921288	2.30193	1.22902	4.31145
FAM92A1	0.00925926	2.32012	1.2309	4.37316
AC079767.4	0.00941107	0.43086	0.228213	0.813449
FOLR2	0.00944089	0.432055	0.229265	0.814218
ADAM19	0.00945928	0.436202	0.233103	0.816257
HBD	0.00951653	0.436776	0.233525	0.816928
FAM3D	0.00953163	0.427088	0.224476	0.812577
CREBRF	0.00955946	0.437011	0.233659	0.817341
DNAH9	0.00958337	0.43327	0.230108	0.815802
MGC15885	0.00965764	0.437559	0.233974	0.818286
TM6SF2	0.00967303	0.42728	0.22437	0.813691
IKZF3	0.00975443	0.437008	0.233262	0.818718
MGAT3	0.0098051	0.433748	0.23011	0.817596
LOC101928917	0.00980612	0.433651	0.230018	0.81756
ARHGEF17	0.00982446	2.2822	1.21991	4.26955
CD79A	0.00983092	0.438717	0.234716	0.820025
MAGIX	0.00983606	0.438583	0.234579	0.820001
MAPKAPK3	0.00985478	2.26943	1.21795	4.2287
LOC389641	0.00989491	0.434747	0.230865	0.818681
NRXN3	0.00992381	0.435439	0.231455	0.819196
RNF217	0.00992815	2.27855	1.21836	4.26127
PTPRH	0.0100677	0.428901	0.225093	0.817245
KCNMB3	0.0101221	2.28065	1.21665	4.27516
FAM76A	0.0101381	2.27087	1.21524	4.24347
CNOT6L	0.0101432	0.440735	0.236	0.823082
NOX5	0.0102146	0.440963	0.236076	0.82367
MYBL1	0.0102449	0.434653	0.230093	0.821071
C14orf159	0.0102548	2.25641	1.21224	4.20001
RP11-796E2.4	0.0102786	0.435681	0.230989	0.821761
TSEN15	0.010307	2.25604	1.21167	4.20058
SCRN1	0.0103426	2.29756	1.21654	4.33919
INO80C	0.0103557	0.435598	0.230763	0.822252
GP5	0.0103884	0.437285	0.23228	0.823223
ZNF385B	0.010411	2.26704	1.21203	4.24038
ADIPOR2	0.0104732	0.437116	0.23196	0.823723
OR51J1	0.0104804	0.436221	0.231108	0.823376
LOC101928303	0.0104836	2.26619	1.21121	4.24005
GALNT6	0.0105412	0.434625	0.229502	0.823083
CD3D	0.0105412	0.439362	0.233938	0.82517
WDYHV1	0.0106083	2.24205	1.20697	4.16477
TCEANC	0.0106797	0.445344	0.239329	0.828695
CRLF3	0.0107423	0.438328	0.232587	0.826061
KIF26A	0.010748	0.446275	0.240085	0.829544
CYTH1	0.0107577	0.441745	0.235775	0.827651
TJAP1	0.0108144	0.433061	0.227534	0.824235
CELA2B	0.0108273	0.437896	0.232023	0.826438
ETFDH	0.0108457	2.24226	1.20474	4.17328
OR1G1	0.0109371	0.44617	0.23963	0.83073
PABPC3	0.0110556	2.22988	1.20125	4.13933
CDCA7	0.0110693	2.25439	1.20413	4.22071
ARNTL2	0.0110943	2.23713	1.20178	4.16443
VHL	0.0111054	2.28449	1.20744	4.32228
CDYL	0.0111141	0.445743	0.238895	0.831691
MCOLN2	0.0111319	0.443995	0.237205	0.83106
P2RY1	0.01114	2.25073	1.20302	4.2109
PRKCE	0.0111656	2.24722	1.20235	4.20009
HOXD11	0.0112875	0.441288	0.234364	0.830909
IQCA1	0.0113203	0.441649	0.234645	0.831274
KLF9	0.0113607	2.2242	1.19776	4.13026
ZBTB37	0.0114039	2.22145	1.19704	4.12253
TJP1	0.0114125	0.445605	0.238218	0.833538
BZRAP1	0.0114212	2.25003	1.20034	4.2177
BCL3	0.0114275	0.445833	0.238407	0.833729
LOC101929759	0.0115095	2.23741	1.19801	4.17858
TRPM2-AS	0.0115461	0.441453	0.234053	0.832635
RBBP8NL	0.0116339	0.442982	0.235337	0.833836
LEPRE1	0.0116587	2.22174	1.1948	4.13134
SPATS2L	0.0117297	2.23571	1.19584	4.17982
MOGAT2	0.0117726	0.442447	0.234587	0.834486
ATOX1	0.0118185	2.21757	1.19289	4.12244
PHYH	0.0118934	2.22995	1.1937	4.16574
KHDC1	0.0119014	2.24063	1.19489	4.20158
CTLA4	0.0119387	0.447141	0.238736	0.837472
MED28	0.0119833	0.448429	0.239883	0.838277
TRAV20	0.0121338	0.444265	0.23567	0.837489
COTL1	0.0121922	2.23202	1.19134	4.18178
TEX37	0.0122541	2.23945	1.19167	4.20849
BSDC1	0.0122948	0.448424	0.239335	0.840177
AKAP8L	0.0123309	0.446038	0.237008	0.839424
PADI3	0.0124361	2.22551	1.1885	4.16736
RP11-644F5.11	0.0124469	0.444927	0.235758	0.839677
KIR2DL3	0.0124577	0.446483	0.237212	0.840375
PRKAG2-AS1	0.0124714	2.20157	1.18543	4.08873
TRAC	0.0125018	0.449609	0.240108	0.841905
FRMD7	0.012519	0.444506	0.235237	0.839943
PRRG4	0.0125391	2.2228	1.18731	4.16136
CTD-2537I9.5	0.0125778	2.21889	1.18654	4.14945
OSBPL6	0.0127983	0.453195	0.243031	0.845099
DNAJC9	0.0128352	0.455511	0.245194	0.846231
GZMH	0.012846	0.449484	0.239407	0.843905
SWI5	0.0129005	2.19806	1.18149	4.0893
CTAGE5	0.013028	2.18931	1.17946	4.06376
ZNF143	0.0130574	0.450002	0.239546	0.845355
RPL37	0.0131498	2.16332	1.17554	3.98111
LOC101928274	0.0132037	2.22541	1.1821	4.18956
OCLM	0.0132391	0.453771	0.242847	0.847891
ZNF300	0.0134124	2.20272	1.1779	4.11917
CHST14	0.0134532	2.19795	1.17705	4.10432
RP11-536G4.2	0.0134856	0.449384	0.238256	0.847603
LOC285191	0.0134924	0.45432	0.242958	0.849557
DPYD	0.0135254	2.19659	1.17633	4.10177
LINC01255	0.0135704	0.455518	0.243981	0.850463
LRRC3	0.0135736	0.449563	0.238283	0.848179
LOC100505718	0.0136063	0.453383	0.241875	0.849845
ZNF451	0.0136254	0.454411	0.242829	0.85035
VAPB	0.0136747	0.45473	0.243055	0.850752
SV2A	0.0137833	2.19463	1.1741	4.10222
PPP2R2A	0.0138986	0.457875	0.245719	0.853208
IGLVIVOR22-2	0.0139515	0.450427	0.2385	0.850669
ATP7A	0.0139642	0.458641	0.246353	0.853863
PCDH1	0.0140781	0.452136	0.239928	0.852035
RP11-1109F11.3	0.0140882	0.453619	0.241328	0.852655
ATG2A	0.0141255	0.457652	0.245142	0.854385
DNAJB13	0.0141503	0.455112	0.24266	0.853565
RP3-522P13.2	0.0141689	0.455667	0.243164	0.853878
C21orf49	0.0142313	0.456245	0.243621	0.854441
CD7	0.0142412	0.452982	0.240479	0.853268
AC078842.4	0.0142478	2.18842	1.16987	4.09378
NDUFB11	0.0142908	2.17294	1.16788	4.04291
AKR1C1	0.0142935	0.459748	0.246899	0.856093
MAP3K11	0.0143023	2.17164	1.16766	4.03887
MAP2K4	0.0143516	0.455419	0.242638	0.854796
TPT1P8	0.0144004	2.18178	1.16801	4.07544
TMEM18	0.0144156	2.19462	1.16926	4.11914
TRAF5	0.0144194	2.18175	1.16787	4.07582
HECTD4	0.0144432	0.459854	0.246765	0.856949
TMEM2	0.0144441	0.456797	0.243817	0.855819
NR3C2	0.0144453	0.457057	0.244066	0.855923
LCK	0.0144752	0.458262	0.245179	0.856534
PPP2R5B	0.0145205	0.45838	0.245222	0.856825
PRM2	0.0145304	0.454488	0.241468	0.855433
GABRR1	0.0146502	2.17795	1.16576	4.06899
TACSTD2	0.0147453	2.20076	1.16744	4.14866
SULF2	0.0148253	2.17409	1.16407	4.06046
PSMF1	0.0148585	0.460206	0.246461	0.859323
FBRS	0.0150889	0.461259	0.247127	0.860935
TTC39C	0.0150974	2.15774	1.1604	4.01225
YARS	0.0151347	0.460359	0.246187	0.860853
ST8SIA5	0.0151405	0.459672	0.245515	0.860635
IQCD	0.0152152	0.45622	0.24208	0.859784
BTF3P13	0.0152158	2.17118	1.16095	4.06047
LOC101929019	0.0153661	2.16797	1.15955	4.05335
CHST12	0.0153997	2.167	1.15922	4.05091
CT45A1	0.0154406	0.457459	0.242931	0.861431
COL8A1	0.0155307	0.460112	0.245352	0.862855
NBR2	0.0156205	0.451405	0.23688	0.86021
ZNF831	0.0156417	0.460702	0.245756	0.863647
MERTK	0.0156761	2.17486	1.15807	4.0844
FCRL3	0.0157131	0.456784	0.241879	0.862629
PLXNA4	0.0157974	0.458859	0.243748	0.863807
CBS	0.0161365	0.464665	0.248866	0.867588
TBC1D28	0.0161712	0.454615	0.239135	0.864261
SMTNL2	0.0162835	2.15469	1.15188	4.03052
RSBN1	0.0163014	0.468131	0.252004	0.869616
LOC100996643	0.0163377	2.15336	1.15139	4.02728
LOC100128644	0.016365	0.454837	0.239068	0.865347
PLXDC1	0.0163721	0.46744	0.251226	0.869735
LOC100310756	0.0163958	2.12953	1.14865	3.94803
2017-03-06	0.0164964	0.468437	0.25202	0.870698
ZC3H12C	0.0165243	2.1324	1.14809	3.96062
MIR1292	0.0165446	2.15077	1.14975	4.02331
CDCP1	0.0165561	2.13412	1.14805	3.96713
TRIM31	0.0165857	0.461823	0.245462	0.868893
LOC100996732	0.0166156	2.12727	1.14699	3.94537
SCN9A	0.016653	2.14653	1.14862	4.01142
TRAF1	0.0167005	0.464235	0.247633	0.870294
UIMC1	0.016711	0.466851	0.250162	0.871232
LOC553103	0.0167469	2.13124	1.14652	3.96173
STX1B	0.0167561	0.469915	0.253093	0.872488
MIR6875	0.0167727	0.46049	0.243909	0.869384
H2AFZ	0.0168043	2.14444	1.14742	4.0078
TMEM17	0.0168253	2.14509	1.14735	4.01047
KLF14	0.0169123	2.12522	1.14486	3.94505
RSF1	0.0169512	0.466572	0.249549	0.872333
RP11-395I6.3	0.0170415	0.464504	0.24741	0.872088
RGS19	0.0171166	2.14136	1.14509	4.00442
SNRNP27	0.0171219	0.470174	0.252825	0.874373
CALB1	0.0171494	0.469679	0.252301	0.874343
CLUHP3	0.0171579	0.462702	0.245502	0.872063
PELO	0.0171592	2.15254	1.14588	4.04358
SLC25A42	0.0171764	0.463509	0.246257	0.872425
CHST2	0.017216	0.470509	0.25302	0.874942
RP11-118G23.2	0.0172568	0.469348	0.251826	0.874759
CPT1C	0.0172678	0.462168	0.244832	0.872431
RRAGD	0.0172784	2.13517	1.14347	3.98697
ADNP	0.0173421	0.470487	0.252822	0.875549
ZFP62	0.0173463	0.466707	0.249124	0.874325
IGF2	0.0173766	0.47107	0.253345	0.875907
RRP15	0.0173963	2.13914	1.14309	4.00312
ATP8A1	0.0174548	2.13641	1.14246	3.99511
RP11-166P13.4	0.0174618	2.13498	1.14228	3.9904
SLC19A2	0.0174637	2.13731	1.14249	3.99838
CSTF2	0.0174637	2.13198	1.14199	3.9802
KCNJ13	0.0174828	2.12504	1.14121	3.957
CNBD2	0.0174837	0.467826	0.250023	0.875365
MINOS1P1	0.0175248	0.468539	0.250662	0.875798
TMPRSS5	0.01754	0.468872	0.250966	0.875981
MIR4680	0.0175549	0.471455	0.253473	0.876894
SPATA3-AS1	0.0175963	2.13464	1.1414	3.9922
SYPL1	0.0175997	2.13559	1.14146	3.99554
SLC46A3	0.0176028	0.468571	0.250585	0.876187
LOC100130642	0.0176169	0.464927	0.247018	0.875064
RP11-1109F11.5	0.0176689	2.11348	1.13896	3.92181
GYPB	0.0177155	0.47291	0.25468	0.878136
SPTA1	0.0177155	0.47291	0.25468	0.878136
KLK8	0.0177406	0.469184	0.250992	0.877052
TBL1XR1	0.0177439	0.468481	0.250301	0.87684
CD8A	0.0178017	0.470104	0.251808	0.877644
DGKZ	0.0178149	2.14226	1.14072	4.02312
LOC100128751	0.0178675	2.10923	1.13734	3.91161
GZMM	0.0179142	0.472548	0.25405	0.878968
HES4	0.0179796	0.4684	0.249899	0.877949
CAPZA3	0.0180527	0.465529	0.247006	0.877376
TRIM52-AS1	0.0180993	0.47068	0.251964	0.879252
ZHX2	0.0181243	0.466439	0.247792	0.878013
DYRK1B	0.0181551	0.470594	0.251804	0.879489
TRAV12-2	0.0181598	2.12645	1.13713	3.97649
ZNF250	0.0182124	0.470535	0.251668	0.879743
TREML5P	0.0182354	0.470293	0.2514	0.879775
KIAA1549	0.0182439	2.12084	1.1361	3.95911
TMEM245	0.0182461	0.469963	0.251062	0.879721
LMBR1L	0.0182681	0.471102	0.252148	0.880187
INVS	0.018304	2.10861	1.13462	3.91867
MRPL40	0.0183516	2.10046	1.1336	3.89197
TSC22D3	0.0184072	2.09617	1.13287	3.87856
MRI1	0.0184094	2.1033	1.13351	3.90282
CAP2	0.0184124	2.14102	1.13689	4.03202
PP2D1	0.0185589	2.11161	1.13336	3.93423
ATP1B1	0.0185727	2.11804	1.13386	3.95648
OPALIN	0.0186042	0.470845	0.251443	0.881691
DEFA6	0.0186474	0.461471	0.242287	0.878939
PIGZ	0.0186818	2.1051	1.13204	3.91454
KIAA1467	0.0187212	2.14045	1.13495	4.03675
ARHGEF16	0.018754	0.472781	0.25314	0.882994
HILS1	0.0187871	0.467634	0.248066	0.881546
LOC646778	0.0188157	2.10808	1.13151	3.92747
LOC101928475	0.0189034	0.473307	0.253458	0.883851
LINC00337	0.0189159	0.473003	0.253143	0.883815
KDM8	0.0189166	0.469252	0.249471	0.882659
RBFADN	0.0189636	0.473582	0.253649	0.884215
ALOX12B	0.0191011	0.468816	0.248802	0.883385
DIDO1	0.0191098	0.47622	0.256054	0.885694
TRPC4	0.0191243	0.468808	0.248764	0.883491
NGFRAP1	0.0191256	2.11147	1.12998	3.94546
MIR210HG	0.019127	0.473035	0.252895	0.884801
RPIA	0.0191528	0.476543	0.256316	0.885989
ATG14	0.0191951	0.477285	0.256994	0.886407
PAQR9	0.0191963	0.47655	0.256266	0.88619
ENSA	0.0191964	0.473072	0.25284	0.885133
ENPP3	0.0192369	0.477352	0.257005	0.886618
IFNA10	0.019249	2.10996	1.12913	3.94281
FZR1	0.0192499	0.473804	0.253489	0.885601
ABCC4	0.0193212	0.477462	0.257003	0.887034
FAM155A-IT1	0.0193565	0.474056	0.253597	0.886166
CTC1	0.0194239	0.472824	0.252299	0.886102
SPRY2	0.0195043	2.09476	1.12633	3.89587
FAH	0.0195186	2.1112	1.12766	3.95258
KIAA0232	0.0195469	0.475456	0.254727	0.887456
LINC00675	0.0196675	0.475998	0.255104	0.888165
CPEB2-AS1	0.0196845	0.475375	0.254467	0.888055
KIAA0355	0.0197669	0.474224	0.253228	0.888086
RP11-320N7.2	0.0197779	0.471009	0.250062	0.887175
MBLAC1	0.0198243	0.475594	0.254503	0.888752
LOC102724323	0.0198473	0.471413	0.250369	0.887613
HTR1F	0.0198599	2.09266	1.12412	3.8957
LOC100506119	0.0198853	2.0885	1.12363	3.88193
MLKL	0.0198944	2.09666	1.12427	3.91009
SSBP3-AS1	0.0199865	0.473957	0.252684	0.888999
MSANTD3-TMEFF1	0.0200684	2.08562	1.12235	3.87563
SLC4A4	0.0200977	2.09513	1.12299	3.90884
CYP3A5	0.0201018	0.476548	0.255086	0.890279
FBXL7	0.0201316	0.479882	0.258347	0.891385
PLA2G6	0.0201411	0.47244	0.250998	0.889249
SHC2	0.0201993	0.480374	0.258748	0.891827
KIAA1919	0.0202039	2.09402	1.1223	3.90707
HTATIP2	0.0203099	2.08464	1.12092	3.87693
MECP2	0.0203855	0.476135	0.254317	0.891424
C1orf106	0.0203931	2.09484	1.12131	3.9136
LOC102724387	0.020399	0.480277	0.258397	0.89268
AC005523.2	0.0204135	0.476368	0.254512	0.891616
HIP1	0.0204705	2.09597	1.12097	3.91899
BNIP3L	0.0204886	0.480192	0.258199	0.893049
ACOT4	0.0205011	2.1033	1.12141	3.94494
FAM83F	0.0206721	0.477625	0.255425	0.893121
EPHA4	0.0207588	0.481037	0.258696	0.894473
SYTL5	0.0208043	2.07787	1.11765	3.86306
PRR9	0.020897	0.476906	0.254434	0.893905
CCDC88A	0.0209589	2.07149	1.11629	3.84405
LOC100506699	0.0210619	0.475097	0.252447	0.894117
TBX1	0.0211202	0.475532	0.252803	0.894496
CLDN10	0.0211532	2.08578	1.1164	3.89689
HECA	0.0212445	0.479175	0.256243	0.89606
AGBL5	0.0212671	0.478346	0.255395	0.895926
PCF11	0.0213287	0.478973	0.255938	0.896368
GLRX2	0.0213582	2.07229	1.11422	3.85415
PUM2	0.021372	0.483347	0.260229	0.897765
ALKBH5	0.0213786	0.483414	0.260287	0.897812
GZMA	0.021455	0.478971	0.25578	0.896913
AK000798	0.0214648	0.479462	0.256255	0.897091
TSIX	0.021559	0.483556	0.260206	0.898621
FAM21EP	0.02157	2.06406	1.11245	3.82971
ATP2B3	0.0216186	0.47629	0.252935	0.896879
OBFC1	0.0216321	2.05587	1.11147	3.80272
METAP2	0.0216806	0.483471	0.259972	0.899115
PTBP3	0.0217075	2.07893	1.11289	3.88354
PSMA7	0.0217313	2.06101	1.11136	3.82213
LINC01140	0.0217365	2.08213	1.11299	3.89517
DBH	0.0218409	2.07817	1.11213	3.88337
PPP1R32	0.0218559	0.477268	0.253609	0.898172
ETHE1	0.021869	2.05671	1.11031	3.80982
HBS1L	0.0219235	0.485703	0.261903	0.900744
LOC101929609	0.0219634	0.477066	0.25328	0.898579
GBP1P1	0.0220553	2.06343	1.10986	3.83626
ZNF596	0.022063	0.480948	0.256996	0.900055
LOC102724611	0.0221226	0.484955	0.260913	0.901381
SLC25A31	0.0221266	0.484785	0.260737	0.901352
ASIC5	0.0221868	2.0547	1.10851	3.8085
HBBP1	0.0222118	0.485628	0.261477	0.901933
ZNF566	0.0222713	2.05734	1.10828	3.81909
MRPL45P2	0.0222813	2.0627	1.10864	3.83779
AIM1L	0.0222953	0.486139	0.261886	0.902417
HRK	0.0223157	0.477658	0.253439	0.900246
LOC101929116	0.0223571	2.06858	1.1087	3.85949
LOC101929025	0.0224083	2.04811	1.10688	3.78971
MRPL17	0.0224347	2.05735	1.10745	3.82202
MYH15	0.022455	0.483141	0.258702	0.902292
LOC102724967	0.0224978	0.482693	0.258205	0.902354
KEL	0.0225359	0.486376	0.261834	0.903479
UCKL1	0.0226267	2.04881	1.10583	3.7959
CCDC176	0.0226317	0.486327	0.26167	0.903864
LOC338694	0.0226377	2.05926	1.10656	3.8322
PPP2R5C	0.0227699	0.481547	0.256742	0.903191
APP	0.0227931	2.06729	1.10637	3.8628
ACTN1	0.0228198	2.06747	1.10625	3.86391
FAM213A	0.0228291	2.06554	1.10606	3.85735
TCF7	0.0228296	0.486304	0.26141	0.904675
CAMK4	0.0229413	0.487131	0.262106	0.905348
GABRQ	0.0230133	0.48809	0.262982	0.905889
CEP41	0.0230503	2.06324	1.10477	3.85327
SKP2	0.0230954	2.05131	1.10366	3.81264
RIIAD1	0.0231051	0.479672	0.25449	0.904104
NUDCD3	0.0231388	2.04881	1.10326	3.80472
AC007255.8	0.0231604	0.483593	0.258314	0.905343
DKK3	0.0231802	0.487238	0.26193	0.906355
SORCS3	0.0231959	0.482644	0.257328	0.905246
CDRT15L2	0.023235	0.485253	0.25988	0.906074
ITGB8	0.0232604	2.06579	1.1039	3.86583
GATSL2	0.0233208	0.48845	0.262979	0.907235
IGF2BP3	0.0233715	2.06371	1.10319	3.86051
LOC101928111	0.0233811	0.483748	0.258209	0.906291
SAMD14	0.0233957	0.485911	0.260348	0.906899
TRIM15	0.023425	0.485865	0.260268	0.907007
2017-03-03	0.0234292	0.488586	0.262987	0.907709
VSIG10	0.023455	2.04735	1.10159	3.80507
SPATA31E1	0.0235581	0.485863	0.26011	0.907549
OR2C1	0.023559	0.48569	0.259937	0.90751
DOCK7	0.0236509	2.0414	1.1002	3.78778
BC034423	0.0237265	2.05698	1.10095	3.84321
TLE2	0.0237846	0.485684	0.259667	0.908426
LOC102725271	0.0237938	0.488014	0.261988	0.909041
SLC25A22	0.0238484	0.486829	0.260738	0.908968
KCNAB2	0.0238625	2.05483	1.10013	3.83803
THEMIS	0.023887	0.486684	0.260548	0.909089
LOC389895	0.023905	2.05997	1.10029	3.8567
ACADS	0.0239184	0.482741	0.256583	0.908238
FBXO6	0.023956	2.04628	1.09907	3.80984
GOLGA8CP	0.0240126	2.04033	1.09837	3.79011
AQP1	0.0240617	0.492191	0.265879	0.911138
BMX	0.0240771	2.05126	1.09883	3.8292
LOC101928881	0.0241448	0.490748	0.264327	0.911118
VSIG1	0.0241904	0.490012	0.263534	0.911122
LOC286161	0.0241974	0.484947	0.258457	0.909915
PCDHGA10	0.0242152	0.487561	0.261047	0.910625
LOC102725343	0.0242576	0.487303	0.26074	0.910732
ZDHHC24	0.0242778	2.04321	1.0973	3.80454
ANGPT1	0.024321	2.05109	1.09764	3.83275
RP11-673E11.2	0.0244012	0.487491	0.260763	0.911353
C12orf43	0.0245304	2.04796	1.09642	3.82529
LOC101928457	0.0246562	0.489073	0.262058	0.912747
CCDC28B	0.0247111	0.484782	0.257707	0.911941
NAALADL2	0.0247232	0.484613	0.257525	0.911949
FHL1	0.024733	2.04744	1.09542	3.82686
BC022047	0.0247369	0.490642	0.263542	0.913439
CTSC	0.024759	2.03155	1.09421	3.77184
MARK3	0.0248207	0.491511	0.264322	0.913974
RDH8	0.0248336	2.04497	1.09477	3.8199
C12orf79	0.0250258	0.492272	0.264857	0.914956
SLC2A5	0.025071	2.03597	1.09305	3.79231
C2orf80	0.025083	2.03989	1.09325	3.80623
DHRS13	0.0250847	0.494847	0.267393	0.915783
GJA10	0.0251922	2.04252	1.09292	3.81719
RP5-890E16.2	0.0252254	2.02678	1.09171	3.76277
PGRMC1	0.025414	2.02353	1.09063	3.75444
FFAR1	0.0254417	0.490453	0.262558	0.916158
GNB3	0.0254727	0.490373	0.262443	0.916261
IRF1	0.025479	0.489979	0.26204	0.916195
WDR44	0.025688	0.489473	0.2613	0.916894
THEM5	0.0257622	0.494485	0.266266	0.918314
LY9	0.025863	0.491349	0.26299	0.917997
ACOT11	0.0258929	2.01833	1.0881	3.7438
MIR6125	0.0258942	0.494553	0.266188	0.918835
RHAG	0.0259278	0.497074	0.268707	0.919525
PGM2L1	0.0259521	0.494492	0.266062	0.919043
LOXL3	0.0260999	2.02508	1.0876	3.77064
FAM126A	0.0262206	2.01499	1.08641	3.73725
LY96	0.0262531	2.02134	1.08667	3.75993
LOC100132891	0.026262	2.02848	1.08708	3.78512
FAM64A	0.0262906	2.0182	1.0863	3.74952
CSF1R	0.0263116	2.01721	1.08615	3.74639
CHRNA5	0.0263398	2.03332	1.08704	3.80335
HBE1	0.0263648	0.49582	0.266951	0.920907
NSG1	0.0265186	0.494676	0.265625	0.921241
ALPPL2	0.0265229	0.48905	0.259959	0.920031
TFCP2L1	0.026527	2.02177	1.08547	3.76572
GPR143	0.02659	0.493122	0.263977	0.921175
HIST1H3E	0.0266022	0.487369	0.258192	0.919968
LINC01089	0.0266457	0.493966	0.264768	0.921569
RASA3	0.0266621	0.491878	0.262646	0.92118
MED25	0.0267444	0.492916	0.263601	0.921717
SLC8A1	0.026758	2.01001	1.08371	3.72804
TNFRSF21	0.0268443	2.02374	1.08418	3.77752
KIAA1211L	0.0268781	2.01344	1.0834	3.74189
RAET1E	0.0270037	0.494453	0.264872	0.923026
ZNF83	0.0270137	2.02541	1.08353	3.78603
LOC101930657	0.0270361	2.00986	1.08248	3.73174
PIK3R2	0.0270391	0.494327	0.264706	0.923133
ERCC5	0.0270531	2.0078	1.08228	3.72478
BACE2	0.0271192	2.03243	1.08349	3.81247
RP3-406C18.2	0.0272293	0.488246	0.258393	0.922563
BSG	0.0272536	0.497868	0.268063	0.92468
FYN	0.0273759	0.495841	0.265875	0.924714
DACT3	0.0274437	0.495664	0.265623	0.92493
ATG4C	0.0274661	2.00419	1.08027	3.71829
MDH2	0.0275503	2.00692	1.08007	3.72915
HNF4A	0.0275738	0.495781	0.265603	0.925439
SULT4A1	0.0276088	0.495783	0.265567	0.925569
EXTL1	0.0276151	0.495868	0.265647	0.92561
BCAR4	0.0276459	0.499285	0.269083	0.926424
CELF1	0.0276686	0.498827	0.268593	0.926415
CCDC137	0.0277005	1.99997	1.07901	3.70698
NSMF	0.0277282	0.491714	0.261336	0.925177
TNN	0.0277553	0.496371	0.266007	0.926234
MIR3656	0.0278095	0.496403	0.265981	0.926441
RIPK3	0.0278729	2.00359	1.07849	3.72223
C9orf62	0.0278741	2.0012	1.07834	3.71384
TSSK2	0.0279194	0.494739	0.264181	0.92651
NAT8B	0.0279886	0.495979	0.265362	0.927018
LOC101929607	0.028003	0.496342	0.265714	0.927145
PFKP	0.0280049	2.00869	1.07822	3.74212
MICALL2	0.0280417	0.496662	0.265997	0.927352
MSRB1	0.0280507	2.00368	1.07774	3.72517
SRP54	0.0281049	0.495963	0.265222	0.927444
TNFRSF4	0.0281604	0.496218	0.265423	0.9277
SAA2-SAA4	0.0283212	0.496595	0.265635	0.928367
SORCS3-AS1	0.0283228	0.49641	0.265446	0.928337
AJ011981	0.0283353	2.01036	1.07691	3.75293
TIGD6	0.0283389	1.99175	1.07583	3.68745
MLXIPL	0.0283435	0.492462	0.26144	0.927627
DLEU7-AS1	0.0284291	2.01037	1.07651	3.75432
DPPA2	0.0284649	2.00661	1.07615	3.74158
OSTC	0.028484	1.99605	1.07547	3.70465
TMCO4	0.0285002	1.98811	1.07495	3.67699
STARD4	0.0285056	1.99585	1.07537	3.70424
F2RL1	0.028528	2.01506	1.07636	3.7724
FLJ38717	0.0285522	2.01414	1.0762	3.7695
ZDHHC8	0.0287455	1.99357	1.07424	3.69967
KCNQ5	0.028776	1.99854	1.07439	3.71763
GLI4	0.0287909	0.493308	0.261825	0.929449
TBRG4	0.0288541	1.99098	1.07364	3.69212
SNRPF	0.028856	1.99208	1.0737	3.69602
GFAP	0.0288615	0.500558	0.269097	0.931109
TCF3	0.0288932	0.501268	0.269788	0.931359
PAEP	0.0289361	1.9933	1.07343	3.70145
GPNMB	0.0289408	0.501916	0.270401	0.931654
TNRC6A	0.0290531	0.501064	0.269413	0.931895
FOXD3-AS1	0.0291332	0.498473	0.266693	0.931692
LOC101928717	0.0292032	1.98427	1.07183	3.67343
LOC286071	0.0292132	1.98963	1.07209	3.69246
FLRT1	0.0292509	0.498378	0.266474	0.9321
MXRA8	0.0293073	0.50266	0.270781	0.933107
LINC01426	0.0293423	0.498625	0.266631	0.932476
SRBD1	0.0294372	1.98254	1.07079	3.67062
CNNM4	0.0294477	1.98763	1.07102	3.68869
TXNRD3	0.0294909	1.98723	1.07082	3.6879
RPL26L1	0.0296129	1.97697	1.06978	3.65349
ZNF415	0.029635	1.99519	1.07066	3.71808
ITGA9	0.0296561	1.99778	1.07071	3.72754
TBCEL	0.0297026	0.500305	0.26797	0.934081
SMIM21	0.0297203	0.499805	0.267443	0.934053
LOC202181	0.0297393	1.98355	1.06962	3.67841
RNF14	0.0297571	0.501034	0.268657	0.93441
LPCAT3	0.0297703	0.499918	0.267506	0.934252
TINAG	0.0298441	0.498545	0.266035	0.934265
RP11-439E19.10	0.0298595	1.97801	1.06884	3.66052
APOM	0.0298607	0.503027	0.270586	0.93514
NOG	0.0298872	2.00104	1.06993	3.74245
FOXO6	0.0299317	0.500721	0.268159	0.934974
S1PR5	0.0299423	0.504104	0.271606	0.935623
C4BPB	0.0300263	0.501149	0.268499	0.935388
LIPF	0.0301134	1.9974	1.06882	3.73269
TLR5	0.0301183	1.98195	1.06801	3.678
LOC101928703	0.030215	0.50136	0.268522	0.936094
PPEF2	0.030219	1.97997	1.0675	3.6724
C1orf85	0.0302352	1.98441	1.06767	3.68832
NCSTN	0.030243	1.98623	1.06773	3.69485
AFF1	0.0303432	0.501299	0.26833	0.936537
ANKRD31	0.0303492	0.504866	0.271972	0.937188
MAL	0.0303762	0.504276	0.27134	0.937179
RP11-359E8.5	0.0303881	1.99192	1.06744	3.71709
SLC2A1	0.0303982	0.504574	0.271623	0.937309
HOXB5	0.0304199	0.504613	0.271641	0.937391
MARS2	0.0304831	0.504618	0.271582	0.937613
LINC00277	0.0305161	0.496039	0.262818	0.936218
NUPR1	0.0305166	0.496884	0.263671	0.93637
NCAN	0.0305175	0.501676	0.268538	0.937218
PRSS23	0.0305423	0.503393	0.270268	0.937606
TTLL7-IT1	0.0305879	1.97785	1.06593	3.66995
TNNT2	0.0305894	1.97906	1.06598	3.67426
TFIP11	0.0305912	0.505693	0.272577	0.938178
UBE2E2	0.0306876	1.97598	1.06544	3.66466
KPNA1	0.0307165	0.501612	0.268272	0.937907
SMAD3	0.0307189	0.499775	0.2664	0.937596
PARM1	0.030748	0.503685	0.270359	0.938377
TRMT6	0.0308886	1.98892	1.06529	3.71336
SH3RF3	0.0309523	1.9874	1.06496	3.70882
MIR29A	0.0310655	1.98687	1.06449	3.70851
NAPA-AS1	0.0311074	0.499062	0.265287	0.938843
TMC5	0.0311868	0.506887	0.273205	0.940444
FECH	0.0312092	0.506961	0.273259	0.940534
LOC101928748	0.031336	1.9765	1.06292	3.67527
GPD2	0.0313391	1.97441	1.06281	3.66789
ELN	0.0315037	0.503795	0.269717	0.941023
RP11-613M5.1	0.0315136	1.98072	1.06243	3.69269
SBK1	0.0315619	0.505524	0.271431	0.941509
FAM183CP	0.0315704	1.98414	1.06237	3.70566
RAB8B	0.0315875	0.507663	0.273605	0.941948
NHP2	0.0315933	1.97212	1.06172	3.66319
C15orf37	0.0316222	1.97722	1.06185	3.6817
LINC00635	0.0316715	0.507695	0.273554	0.942241
PTCHD4	0.0317215	1.98107	1.06164	3.69676
C7	0.0317278	0.503981	0.269685	0.941828
CDH15	0.0317414	0.50436	0.27006	0.941937
SPRED3	0.0317454	0.504459	0.270157	0.941967
LMTK2	0.0317838	0.507794	0.273545	0.94264
MUC8	0.0318073	0.504644	0.270285	0.94221
HOXD12	0.0318429	0.504783	0.270393	0.942355
DCLRE1B	0.0318915	1.96988	1.06046	3.65918
BNC1	0.0318939	0.50393	0.269469	0.942393
EPHA10	0.0319195	0.500526	0.265972	0.941929
WDFY4	0.0319837	1.98214	1.06068	3.70414
MS4A1	0.0320009	0.503608	0.269034	0.942709
IQUB	0.0320954	1.96793	1.05959	3.65495
LRP10	0.0321163	0.507318	0.272727	0.943697
UBR4	0.0321166	0.505195	0.270546	0.94336
ATF5	0.0321573	0.505439	0.270756	0.943538
BC036209	0.032188	0.50555	0.27084	0.943661
RP11-337C18.10	0.0322268	1.95618	1.05856	3.61495
CD22	0.0322967	0.507536	0.272774	0.944345
SYTL2	0.0323487	0.508134	0.273339	0.944615
CCNYL2	0.0323822	1.96868	1.05854	3.66136
AMFR	0.0324288	0.50928	0.274443	0.945064
SDHD	0.0325306	1.96131	1.05764	3.63707
CXCR6	0.0325401	0.505486	0.270429	0.944852
BC041998	0.0325677	0.505555	0.270473	0.944956
SSH3	0.0326336	1.95611	1.05702	3.61992
ARIH2	0.0327053	0.506085	0.270883	0.945506
WNT10B	0.0327538	0.509055	0.273893	0.946124
NAGA	0.0328136	1.9627	1.05664	3.64569
LOC284889	0.0328262	1.96002	1.05648	3.63631
SPAG1	0.0329215	1.99172	1.0575	3.75126
DPF2	0.032976	0.507333	0.271903	0.946611
CYP8B1	0.0330172	0.506904	0.271423	0.946686
DQ581328	0.0330285	0.509792	0.274387	0.947157
SLC25A51	0.0330614	1.9704	1.05605	3.67642
FOLH1	0.0331331	1.95103	1.05495	3.60826
SNIP1	0.0331705	0.512744	0.277307	0.948069
ANKRD60	0.0332822	0.507985	0.272278	0.947738
HIST1H2AG	0.0333123	1.95848	1.0546	3.63705
SLITRK2	0.0333203	1.95872	1.05458	3.638
KLRB1	0.0334526	0.510693	0.274909	0.948704
AC092667.2	0.0334897	1.97556	1.05466	3.70055
CIB3	0.0334939	1.96066	1.05402	3.64716
CCDC64	0.0334977	0.510826	0.275003	0.948873
EGR1	0.0335182	1.95667	1.05377	3.63322
SRP14	0.0335528	0.502841	0.266749	0.947893
DDRGK1	0.0335712	1.94763	1.05319	3.6017
MAP3K14-AS1	0.0335747	1.94907	1.05324	3.60684
MIR6513	0.0335779	0.50794	0.271948	0.948722
IL18R1	0.0335928	1.96926	1.05402	3.67924
ASMT	0.0335943	0.508024	0.272019	0.948789
PDRG1	0.0337478	0.507786	0.271627	0.949267
SLPI	0.0337634	1.96295	1.05312	3.65879
PGC	0.0337792	0.509863	0.273738	0.949669
ASXL3	0.0337891	1.95371	1.05265	3.62606
TCN2	0.0338157	1.94259	1.05209	3.58682
ADAM11	0.0338204	0.506806	0.270551	0.949369
DDI2	0.0338655	0.512203	0.276077	0.950287
PI4K2A	0.0338708	0.511601	0.275447	0.950219
GLT8D2	0.0339474	0.507306	0.270943	0.949865
COPG2	0.0339977	1.95351	1.05188	3.62799
PCAT4	0.0340019	0.511496	0.275213	0.950637
SRD5A2	0.0340665	1.94085	1.05111	3.58373
RP11-710C12.1	0.0341459	1.96306	1.05172	3.66409
ZNF204P	0.0341921	0.511998	0.275553	0.951333
AZGP1	0.0342269	0.509217	0.272645	0.951062
LOC728730	0.0342487	1.95149	1.05089	3.62389
CFP	0.034267	1.95035	1.05077	3.62006
NARF	0.034325	0.513008	0.276474	0.951907
NELL2	0.0343532	0.514663	0.278167	0.952226
PDZD2	0.0343911	0.509143	0.272413	0.951594
LOC100508408	0.0344012	0.512552	0.275928	0.952094
LOC102725383	0.0344263	0.503719	0.266816	0.950964
TULP3	0.0344562	0.509505	0.272725	0.951859
PERM1	0.0344567	0.509181	0.27239	0.951816
FUK	0.0344612	0.510108	0.273342	0.951958
LINC00920	0.0345162	1.95259	1.04996	3.6312
ANKRD32	0.0345274	1.94981	1.04981	3.62138
SLC19A3	0.0345283	1.94987	1.04981	3.62161
RP11-559M23.1	0.0345904	0.513679	0.276919	0.952865
LINC00853	0.0346138	0.513382	0.276588	0.952901
LOC101927310	0.0346604	0.509283	0.272303	0.952502
DHX40	0.0347153	0.512934	0.276027	0.953171
ERG	0.0347701	1.96699	1.0496	3.68623
ALOX5	0.0348069	1.94945	1.0488	3.62353
TCEA3	0.0348637	0.513411	0.276382	0.953718
ZIC4	0.0350858	1.94702	1.04771	3.61826
DBP	0.0351525	1.93726	1.0471	3.58415
IL20RB	0.0351762	0.510901	0.273489	0.954407
ANKRD52	0.035191	0.513952	0.276637	0.954849
ACSS3	0.0352046	1.95111	1.04744	3.63443
STAB1	0.035215	1.95794	1.04766	3.65915
BTBD6	0.0352568	0.514033	0.276659	0.955073
RHO	0.0352673	0.514989	0.277645	0.955229
CRX	0.0352819	0.51047	0.272945	0.954696
P2RY10	0.0353161	0.51491	0.277516	0.955376
KIF13A	0.0353267	1.96221	1.04741	3.67597
DLX3	0.0353329	0.511539	0.274002	0.954999
SHROOM1	0.035338	0.511498	0.273955	0.955011
SH3GLB2	0.0353822	0.51198	0.274412	0.955216
CPT1A	0.0354525	1.94826	1.04645	3.62721
OGDH	0.0354565	0.506588	0.268789	0.954769
OLFML2B	0.0355399	1.94451	1.04601	3.61479
FAM161B	0.0355664	1.93932	1.04573	3.59649
HR	0.0355812	0.511518	0.27375	0.955803
GCFC2	0.0356038	1.96201	1.04641	3.67874
U91328.2	0.0358337	1.94141	1.04487	3.60724
EPN3	0.0359013	0.511202	0.273127	0.956801
HSPA4L	0.0359328	1.94001	1.04447	3.60341
ZNF396	0.0359605	0.512543	0.274459	0.957157
RELN	0.0360611	0.512873	0.274709	0.957521
LOC100130654	0.0361046	0.512295	0.27407	0.95759
ENPP1	0.0361406	0.5144	0.27622	0.95796
CCR7	0.0361681	0.515773	0.277623	0.958213
BRD2	0.0361876	0.513081	0.274807	0.957952
ZC3H13	0.0362235	0.512272	0.273936	0.957971
TMEM138	0.0362934	0.518533	0.28039	0.958939
LOC340357	0.0362974	1.93303	1.04296	3.5827
MAPK10	0.0363178	1.92802	1.04272	3.56496
RNF152	0.0363892	0.513728	0.275293	0.958675
OAZ2	0.0363953	0.513216	0.274757	0.958634
FRK	0.0365466	0.514004	0.275435	0.959211
RABGAP1L	0.0365486	0.516549	0.278081	0.959514
MEOX1	0.0366326	0.51191	0.273186	0.959242
LOC283856	0.0366449	1.96235	1.04274	3.69297
PARP1	0.0366499	0.515536	0.276933	0.959718
PKN3	0.0366709	1.92606	1.04144	3.56209
IL1R2	0.0367365	1.93859	1.04164	3.60791
LINC00112	0.0367462	1.93652	1.04154	3.60055
TFAP2B	0.0367929	0.517349	0.278693	0.960378
PLB1	0.0368079	1.92725	1.04102	3.56793
PRPF18	0.036814	0.516935	0.278241	0.960397
DOCK9-AS2	0.036829	0.514462	0.275652	0.960163
RP11-708J19.1	0.0368308	1.93715	1.04127	3.60383
LINC00937	0.0368386	0.51011	0.27114	0.959695
LOC101928161	0.0368408	0.516743	0.278016	0.96046
RP11-109E24.2	0.0368691	0.513381	0.274494	0.960167
TREM1	0.0368714	1.94196	1.04128	3.6217
SLC2A1-AS1	0.0368848	0.514172	0.2753	0.960308
CARTPT	0.0369098	0.517184	0.278414	0.960728
PSMC1	0.0369651	0.517695	0.278897	0.96096
COL21A1	0.0369657	1.92911	1.04054	3.57647
CYC1	0.0369826	1.93082	1.04054	3.58284
FGF10	0.0370695	0.51682	0.277888	0.96119
ACR	0.0370966	0.515062	0.276032	0.96108
USP12	0.0371238	0.515889	0.276868	0.961258
BEND2	0.0372479	0.514836	0.27566	0.961534
TRIB3	0.0372762	1.94994	1.04015	3.65552
NANP	0.0373053	1.94192	1.0398	3.62674
SLC27A3	0.0373646	1.92048	1.03892	3.55007
LOC497256	0.0374461	0.514926	0.275574	0.96217
CASC3	0.0374632	0.517162	0.277887	0.962466
CYTH2	0.0374643	0.518591	0.279379	0.962623
OPRL1	0.0375128	0.515423	0.276031	0.962434
CRYGA	0.0375544	0.515851	0.276438	0.962611
SPTB	0.0377196	0.521034	0.281709	0.963677
CDK14	0.0377758	1.91799	1.03747	3.54584
RND2	0.0377843	0.516146	0.276538	0.963365
EFTUD2	0.0378112	1.927	1.03762	3.57871
MYO16	0.0378719	1.93718	1.03773	3.61626
ABCB9	0.0379208	0.519212	0.279616	0.964111
HABP4	0.0379288	0.518787	0.279164	0.964092
ARMCX1	0.0380174	1.92681	1.03693	3.58039
LINC00923	0.0380279	1.91937	1.03667	3.55368
MAP7D2	0.0381164	0.516667	0.276782	0.964458
TNFSF13	0.0381267	1.91265	1.03614	3.53062
TRIM3	0.038186	0.519918	0.280117	0.965005
LOC100506655	0.0382316	1.93221	1.03637	3.60241
MRPL15	0.0382355	1.9235	1.0361	3.57093
CEP152	0.0382526	1.93231	1.0363	3.60302
RP11-803D5.4	0.0382708	1.92195	1.03594	3.56575
RASIP1	0.0383652	0.5214	0.281512	0.965706
SWAP70	0.038407	1.91738	1.03536	3.55079
FAM46B	0.0384414	1.91237	1.0351	3.53313
SCARA5	0.0384789	1.93267	1.03556	3.60697
PRO2012	0.0385831	0.51817	0.277933	0.96606
LOC101927719	0.0385892	0.519015	0.278811	0.966162
TLR2	0.0386085	1.91933	1.03475	3.56009
MMRN2	0.0386242	0.517746	0.277453	0.966146
ARX	0.0386396	0.51776	0.277455	0.966195
L3MBTL4	0.0386466	1.91981	1.03464	3.56229
LIN7A	0.0386483	1.92109	1.03467	3.56691
MRGPRF	0.0386734	1.91985	1.03455	3.56272
JAM2	0.0386932	1.91596	1.03438	3.54891
KIAA1755	0.038718	0.518535	0.278195	0.966513
ROBO2	0.0387275	0.519282	0.278967	0.966615
MAGEE1	0.0387372	0.518869	0.278526	0.966605
HSD17B7P2	0.0387574	0.523738	0.283623	0.967134
PRAM1	0.0388289	1.91117	1.0338	3.53315
ARL2BP	0.0389566	0.520612	0.280157	0.967446
NUTM2A	0.0389608	0.520956	0.280514	0.967491
FBXL21	0.0389683	0.516785	0.276147	0.967121
KIAA1656	0.0390835	0.518548	0.277884	0.967643
FAM129B	0.0391014	0.518304	0.277613	0.967675
SPATA9	0.0391187	0.511817	0.270863	0.96712
LOC400620	0.0391259	1.90949	1.03279	3.5304
IL21R	0.0391491	0.518145	0.277404	0.967807
PVRL3	0.0391521	0.520165	0.279515	0.968004
DSP	0.0391525	0.518238	0.277499	0.967826
PRPS2	0.039159	1.91622	1.03286	3.55508
LOC101805491	0.0391694	0.520124	0.279457	0.968053
CTSL	0.0392115	0.521492	0.280855	0.968308
WDR43	0.0392331	1.91887	1.03269	3.56551
FBLN1	0.039258	1.91846	1.0326	3.56428
ATXN2	0.0392866	1.91529	1.03242	3.55313
TMEM179	0.0393532	0.518211	0.277293	0.968442
CDC27	0.0393855	0.522312	0.281563	0.968912
NKAIN4	0.0394186	0.518724	0.277772	0.96869
LINC00851	0.0394569	0.522041	0.281214	0.969105
PRF1	0.0395051	0.518797	0.277772	0.968962
IRF3	0.0395136	1.90895	1.03152	3.53271
NSAP11	0.0395438	1.91343	1.03154	3.54926
IFT22	0.0395797	0.5219	0.280958	0.969466
MZT1	0.0396846	0.522543	0.281542	0.969841
ABCC13	0.0397537	0.522083	0.280998	0.970011
TRIM33	0.0397826	0.52299	0.281926	0.970177
COL15A1	0.0398126	0.523653	0.282599	0.970325
HADH	0.0398207	1.91372	1.03066	3.55337
PSG1	0.0398766	1.92605	1.03079	3.59889
PTPRR	0.0398942	0.522567	0.281383	0.970478
MGC27345	0.0399666	1.91181	1.03014	3.54807
LOC151760	0.0399979	1.91393	1.03009	3.55609
FAM134A	0.0400095	0.521058	0.279697	0.970699
CCDC84	0.0400288	0.522422	0.281113	0.970873
NSUN2	0.0400524	1.90996	1.02982	3.54229
FLJ11292	0.0401212	1.9105	1.02962	3.54502
LINC00382	0.0401323	1.91761	1.02975	3.57099
JDP2	0.0401336	1.90391	1.02942	3.52127
KCNQ4	0.040145	0.519795	0.278255	0.971004
ALKBH8	0.0402015	1.91007	1.02935	3.54436
CAT	0.0402322	0.52142	0.279883	0.971404
HPDL	0.0402525	1.90545	1.02908	3.52816
PLIN4	0.0402808	0.520543	0.278921	0.971479
ACO1	0.0402851	1.91443	1.02919	3.5611
ZNF701	0.0403056	1.92178	1.0293	3.58812
LRFN5	0.0403091	0.520966	0.279339	0.9716
P2RY13	0.0403347	1.91347	1.02901	3.55816
HERC6	0.0403389	1.90903	1.02889	3.54207
KCNA1	0.0403764	0.520334	0.278618	0.971752
SLC45A2	0.0404018	0.52085	0.279137	0.971871
RPL41	0.0404272	1.89272	1.02822	3.48407
CUX2	0.0404565	0.518597	0.276732	0.971853
INTU	0.0404778	1.91745	1.02864	3.57425
DPF1	0.0405172	0.52007	0.27822	0.972157
KIRREL	0.0405815	0.519596	0.277667	0.972314
ALDH3A2	0.0405832	1.90049	1.02791	3.51378
PLAC9	0.0406411	0.52078	0.278855	0.972589
PTPN23	0.040657	0.516793	0.274678	0.97232
HIST1H3C	0.0406729	1.91844	1.02804	3.58004
KAT2B	0.0407763	0.526487	0.284751	0.973443
STYK1	0.0407771	0.521455	0.279446	0.973053
P4HTM	0.0407799	1.90048	1.0273	3.51586
LOC101928464	0.0408203	0.521697	0.279662	0.973202
EAF2	0.0408338	1.9014	1.02715	3.51976
PNRC2	0.0410775	0.524715	0.282616	0.974204
RP3-452M16.1	0.0410872	0.520783	0.278473	0.973936
AXDND1	0.0411698	0.52144	0.27909	0.974234
M1AP	0.0411834	1.9058	1.02615	3.53952
LILRB5	0.0412135	0.522207	0.279859	0.974423
MIR4746	0.0412331	0.524954	0.282734	0.974685
PDE4D	0.0412367	1.91592	1.0262	3.57706
TJP3	0.0412583	0.522236	0.27985	0.974559
MARCKSL1	0.0413474	0.524826	0.2825	0.975015
APOA1BP	0.0413582	1.90668	1.02562	3.54464
EPB42	0.0414175	0.527765	0.285551	0.975436
ATF7IP	0.0414436	0.52189	0.279328	0.975089
SPHKAP	0.0414482	1.91469	1.0255	3.57487
ADTRP	0.0414673	0.524697	0.282262	0.975362
GPR146	0.0414737	0.527939	0.285686	0.975613
CHRFAM7A	0.0414935	1.90097	1.02508	3.52527
HBA1	0.0414964	0.524073	0.281579	0.975404
SMO	0.0415626	1.90057	1.02485	3.52457
TNRC6B	0.0415774	0.523835	0.281258	0.975628
PROM1	0.0415989	1.89919	1.02471	3.51993
FAM229A	0.0416399	0.526616	0.284141	0.97601
C20orf78	0.0416635	0.525299	0.282728	0.975987
TOPORS	0.0416764	0.524497	0.281871	0.975969
ADAM32	0.0417052	1.8961	1.02432	3.50983
ZNF25	0.0417224	1.89151	1.02417	3.49336
SSR3	0.0417774	1.9055	1.02429	3.54484
APBA2	0.0418723	0.525431	0.282688	0.976614
AK096335	0.0418935	1.89203	1.02366	3.49703
OBSL1	0.0418947	1.89991	1.02381	3.5257
VPS16	0.0419184	1.8943	1.02363	3.50554
RNASE1	0.0419582	0.522927	0.279977	0.976698
LPHN3	0.0420392	1.90992	1.02356	3.56385
C2orf50	0.0420648	1.89524	1.0232	3.5105
QSOX2	0.0420743	0.524896	0.281952	0.977175
IL17RC	0.0421577	1.9107	1.02321	3.56796
IL22	0.0421616	0.525439	0.28245	0.977468
ISCA1	0.0421713	0.526795	0.283876	0.977586
PDZD11	0.0422391	0.523108	0.279928	0.977544
OTC	0.0422421	1.89783	1.0227	3.52182
KRT19P2	0.0422536	0.526146	0.283119	0.977786
THAP10	0.0422553	1.89611	1.02263	3.51568
ESPN	0.0422915	0.529339	0.286473	0.978103
CLDN9	0.0423598	0.519141	0.275669	0.977646
SQLE	0.0423761	1.89428	1.02223	3.51028
ITGB5	0.0424647	0.526634	0.283455	0.978437
SUCLG1	0.0425095	1.88668	1.02168	3.48403
FBXO9	0.0425116	0.529526	0.286484	0.978755
ARSB	0.0425609	1.8858	1.02151	3.48136
LOC101928101	0.0425644	1.89222	1.02161	3.50474
CGB1	0.0426516	0.523921	0.280433	0.978817
C4orf47	0.0427317	0.526689	0.283287	0.979222
CTA-331P3.1	0.0427549	1.89263	1.02104	3.50824
GAPVD1	0.0428041	0.529514	0.286223	0.979604
RUNDC3A	0.0428154	0.530996	0.287791	0.979726
LOC101927490	0.0428176	1.90051	1.02099	3.5377
PTCD2	0.0428349	1.89502	1.02084	3.51779
GNG5	0.0429362	1.88625	1.02038	3.48688
MSI2	0.0429395	0.527223	0.283677	0.979862
TSPAN5	0.042966	0.530027	0.286632	0.980103
EPHB6	0.0429787	1.89377	1.02038	3.51472
BSPRY	0.0430051	1.8869	1.02019	3.48993
PPIAP21	0.043045	1.89296	1.02017	3.51246
TBR1	0.0433427	0.525851	0.281887	0.98096
B4GALT3	0.0433742	0.531114	0.287445	0.981343
FBXO30	0.0434269	0.528395	0.284509	0.981346
GPX7	0.043456	1.89286	1.01893	3.51635
RP11-498E2.7	0.0435435	0.525951	0.281824	0.981551
SLC6A8	0.0435644	0.531617	0.287822	0.981916
LSM3	0.043569	0.524952	0.280748	0.981572
AZGP1P1	0.0436281	0.528819	0.28479	0.981951
C9orf37	0.043634	0.527565	0.283455	0.981901
CAMK2N1	0.0436579	0.528968	0.284923	0.982044
MRM1	0.0437068	0.529638	0.285594	0.982221
LL0XNC01-7P3.1	0.0437608	0.528367	0.284199	0.98231
hsa-let-7a-3	0.0437651	0.528953	0.284817	0.982353
CACFD1	0.0437676	0.529811	0.285727	0.982405
RALGDS	0.0437743	0.529382	0.285265	0.982402
ZNF23	0.0438364	0.52896	0.284765	0.982559
IFNA14	0.0438558	0.528126	0.283864	0.982573
KDM5B	0.0438622	0.529421	0.285233	0.982657
COX6CP1	0.0439404	1.88876	1.01741	3.50636
GYPA	0.043964	0.532331	0.288249	0.983096
KCNE3	0.0440155	1.87913	1.01705	3.47192
FAM19A2	0.0440712	1.8878	1.01701	3.50418
CACNA1I	0.0440781	0.526543	0.282003	0.983137
CD33	0.0440972	1.87879	1.01681	3.47152
ACAA1	0.0441233	1.87823	1.01672	3.46972
ACSF2	0.0442202	1.88604	1.01654	3.49924
L2HGDH	0.0442395	0.529076	0.284553	0.983726
C22orf46	0.0442545	1.87534	1.01629	3.46052
RASL11A	0.0442773	0.527261	0.282596	0.983748
XK	0.0442888	0.532801	0.28848	0.984044
OTX1	0.0442957	0.525968	0.281215	0.98374
DERA	0.0443203	1.87661	1.01612	3.46581
DLAT	0.0443429	1.89774	1.01634	3.54351
RHOXF1	0.0443806	0.529426	0.284807	0.984148
RP1-155D22.1	0.044381	0.530921	0.286397	0.984219
C16orf87	0.0444096	1.88485	1.01597	3.49681
KLHDC7A	0.0444481	0.529928	0.285284	0.984365
LOC100505782	0.0444737	0.527337	0.282514	0.984319
GMPR2	0.0444895	1.87368	1.01558	3.4568
HDAC1	0.0445883	1.88141	1.0154	3.48602
AHR	0.0445939	1.88517	1.01543	3.49986
SQRDL	0.0446102	1.87815	1.01529	3.47432
TBC1D13	0.0446298	1.89213	1.01541	3.5258
CD3G	0.0446524	0.530722	0.28596	0.984985
FHDC1	0.0447168	0.532737	0.288055	0.985257
BAI3	0.0447181	1.88689	1.01508	3.50745
LOC100130548	0.0447539	1.88724	1.01498	3.50911
TAB2	0.0448103	0.533582	0.288881	0.985558
MAMDC4	0.0448904	1.87848	1.01447	3.47833
LINGO3	0.0449159	0.528046	0.282899	0.985624
AQP8	0.0449842	0.528245	0.283054	0.985828
LA16c-83F12.6	0.0449886	1.88557	1.01427	3.50534
ENDOV	0.0450282	0.527403	0.282126	0.985919
HMGN3	0.0450359	1.88302	1.0141	3.49644
ACADL	0.0450567	1.87318	1.01393	3.46062
LINC01442	0.0450735	0.528548	0.283302	0.986097
CD247	0.0450779	0.531574	0.286515	0.986232
LMNTD1	0.0450845	1.89408	1.01409	3.53768
NRCAM	0.0451886	0.528039	0.282667	0.986405
SMPX	0.0452225	1.88145	1.01354	3.49257
IL12A-AS1	0.0452316	0.528227	0.282832	0.986536
S100A7A	0.0452387	0.528647	0.283271	0.986573
AANAT	0.0453322	0.528762	0.283316	0.986845
RBM38	0.0453453	0.533604	0.288463	0.987069
GLRX5	0.0454214	0.534325	0.289173	0.98731
RP11-164P12.4	0.0454571	0.528317	0.282742	0.987185
ADCY6	0.0454863	1.87959	1.01275	3.48837
FAM195A	0.0455349	1.87826	1.0126	3.48397
RAB10	0.045549	0.527306	0.281597	0.987411
ND6	0.0455534	1.86972	1.01245	3.45285
NES	0.045557	0.529126	0.283518	0.987501
SLC35D2	0.0455805	1.86737	1.01235	3.44453
RP11-420K14.2	0.0456527	0.531405	0.285863	0.987855
ELOF1	0.0456667	0.53226	0.286763	0.987926
SERPING1	0.0456748	1.89291	1.01234	3.53942
PCDH8	0.0457065	1.87319	1.01205	3.46707
MMP24	0.0457464	1.88351	1.01204	3.50542
ZNF44	0.0457833	0.529609	0.283846	0.988162
WNT9B	0.0457945	1.87339	1.0118	3.46867
FAM124A	0.0458031	1.88956	1.01194	3.52832
CHCHD7	0.0458541	1.87767	1.01167	3.48498
AQP2	0.0458852	0.529708	0.283868	0.988455
DAK	0.0459452	1.86713	1.0113	3.4472
BCL2L10	0.0459472	0.529426	0.283518	0.988622
LOC101927770	0.0459873	0.52778	0.281741	0.988681
AMMECR1	0.0459973	0.534837	0.289249	0.988943
LURAP1L	0.0461413	1.86918	1.01076	3.45661
SLC25A41	0.0461433	0.529529	0.283468	0.989182
LINC00892	0.0462091	0.532819	0.286917	0.989471
KRT18P44	0.0462256	0.528785	0.282611	0.989392
ATP1A1	0.0463647	1.86596	1.0101	3.44698
NLGN4Y	0.0463761	1.87671	1.01016	3.48663
YLPM1	0.0464159	0.533872	0.287874	0.990083
LINC01364	0.0464527	0.533826	0.287795	0.990184
C20orf173	0.0464852	0.534025	0.287981	0.990281
LOC145845	0.0465002	1.8897	1.00991	3.5359
LINC00216	0.0465017	1.86904	1.00974	3.45964
PRRX1	0.0465607	0.533409	0.287262	0.990475
CIDEC	0.0465894	0.530837	0.284495	0.990483
PCDH17	0.0466189	0.533537	0.287351	0.990641
MEOX2	0.0466295	0.530624	0.284237	0.99059
PTPLB	0.0466748	1.87341	1.00928	3.47738
IRAK3	0.0466845	1.86363	1.00918	3.44154
TKTL1	0.0467385	0.534276	0.288045	0.990995
GIMAP1-GIMAP5	0.0467443	0.533294	0.28699	0.990985
PID1	0.0467632	1.88222	1.0091	3.51083
SPOCK2	0.0467878	0.533809	0.287505	0.99112
BC069804	0.0467947	1.87931	1.00899	3.50035
NPBWR1	0.0468162	0.536024	0.289856	0.991257
OTUD7B	0.046834	0.533532	0.287171	0.991242
RP11-402G3.5	0.046863	0.531225	0.284687	0.991263
CUZD1	0.0469195	1.86926	1.00856	3.46448
APBA1	0.0469231	0.530765	0.28415	0.99142
CUL4A	0.0470888	0.534781	0.288302	0.991982
FAM188A	0.0470926	1.86996	1.00807	3.46874
KLHL42	0.047105	1.87051	1.00804	3.4709
LINC00309	0.047157	0.534339	0.287774	0.992161
EMC2	0.0471642	1.85983	1.0078	3.43219
CCDC120	0.04718	0.531576	0.284805	0.992161
FRYL	0.0472383	0.533788	0.287119	0.992375
CLCN6	0.0472435	0.531342	0.284505	0.992334
PTPRF	0.0472823	0.533976	0.287285	0.992501
ATP1A2	0.0473951	0.531853	0.284928	0.992769
DHH	0.0474391	0.531986	0.285034	0.992895
TMEM9B	0.0474903	0.534876	0.288081	0.993098
TNNC1	0.0475374	0.531241	0.284162	0.993155
PDGFB	0.0475447	0.532093	0.285064	0.993193
LINC01013	0.0475589	0.535606	0.288808	0.993302
IMPA2	0.0475797	1.86637	1.00668	3.46023
LOC101927098	0.0476793	1.85864	1.00636	3.43273
EPHB1	0.0477126	1.88322	1.0064	3.52396
RCBTB1	0.047746	1.86658	1.00622	3.4626
BTAF1	0.047748	0.534664	0.287647	0.993807
RP11-83N9.5	0.0477493	0.532586	0.285425	0.993773
LOC101927722	0.0477666	0.536138	0.289212	0.993886
MTG1	0.0478056	1.85951	1.00601	3.4371
FAM57A	0.0478138	1.88043	1.0061	3.51459
LOC439951	0.0478385	1.86565	1.00595	3.46006
CYP26B1	0.0478737	0.532801	0.285555	0.994123
HMGB1P12	0.0480603	1.86763	1.00535	3.46951
PRR34-AS1	0.0480918	0.535771	0.288558	0.994775
TIAM1	0.0481407	0.535162	0.287866	0.9949
PRDX4	0.04827	1.86331	1.00474	3.45551
B4GALNT4	0.0482732	0.536513	0.28921	0.995285
PRIM2	0.048302	1.86643	1.00467	3.46736
PWRN2	0.0483615	1.86395	1.00449	3.45876
RAD51C	0.0484295	1.86143	1.0043	3.45011
CECR2	0.0484318	0.537197	0.289818	0.995728
NRG1	0.0484366	1.86693	1.0043	3.47051
LINC01138	0.0484676	1.85444	1.00417	3.42469
KRT77	0.0485507	0.53681	0.289308	0.996049
ZFYVE9	0.0486175	1.86217	1.00378	3.4546
CHI3L2	0.0486232	0.536706	0.289139	0.996246
LYRM9	0.0486259	0.537527	0.290019	0.996263
CXXC1P1	0.0486284	1.86404	1.00376	3.46164
LINC01431	0.0486584	0.529415	0.281332	0.996262
HOXC-AS3	0.0486702	0.536045	0.288392	0.996368
XPNPEP2	0.0487304	0.537289	0.28968	0.996545
CA10	0.0487636	1.86696	1.00339	3.47374
PIP5K1B	0.0487637	0.53703	0.289376	0.996634
TENM1	0.0489061	0.539407	0.291823	0.997044
CD28	0.0489479	0.539188	0.291553	0.997155
MYL9	0.0489539	0.53731	0.289526	0.997156
CD34	0.0489594	1.86408	1.00284	3.46494
OR51E1	0.049023	1.87113	1.00269	3.49174
LOC100506538	0.0491353	1.85946	1.00235	3.44946
CEBPD	0.0491456	1.85001	1.0023	3.41468
CA4	0.0491804	1.86757	1.00224	3.48001
MIR4745	0.0492052	1.87805	1.0022	3.51933
GID8	0.0493123	0.540329	0.292497	0.998149
HLA-F-AS1	0.0493629	1.85868	1.00173	3.44871
PINK1-AS	0.0493747	1.85807	1.0017	3.44659
ZG16B	0.0494039	1.85532	1.00161	3.43666
ISM2	0.0494095	0.537892	0.289792	0.998399
OMD	0.0494851	1.85136	1.00139	3.42277
C1QTNF1-AS1	0.0495193	0.534081	0.285619	0.998682
BSCL2	0.0495476	1.857	1.00123	3.44422
CHCHD3	0.0495587	1.84891	1.00119	3.41442
PCDHA1	0.0496341	1.8659	1.001	3.47811
C22orf42	0.0496553	1.84992	1.00093	3.41902
SNRNP48	0.049702	1.84987	1.0008	3.41926
CACNB4	0.0497194	1.86251	1.00076	3.46629
MAGOH	0.0497202	1.85755	1.00076	3.44789
TRIM6	0.0497381	1.85098	1.0007	3.42372
GATAD2A	0.0497623	0.538611	0.290288	0.999358
ACP1	0.0497686	0.538831	0.29052	0.999375
LOC101928304	0.0498083	1.84714	1.00051	3.41018

## Sheet: Table S3-TCGA LAML
Gene Symbol	P value	HR	Low 95%CI	High 95%CI
FIBP	3.75437e-08	3.59897	2.28062	5.67941
TRAF3IP2-AS1	5.66621e-08	0.286842	0.182744	0.450238
AC022182.3	1.47287e-07	3.42295	2.16331	5.41604
CENPC	1.49097e-07	0.305269	0.196081	0.475258
CCND3	1.62066e-07	3.30351	2.11249	5.16601
CLCN5	1.98522e-07	3.37434	2.1337	5.33634
RP3-415N12.1	3.32397e-07	0.311945	0.199437	0.487924
RP11-95I19.1	4.69642e-07	0.321881	0.207101	0.500273
LPCAT3	6.70424e-07	3.14127	2.00013	4.93349
NDUFS2	1.33171e-06	2.97166	1.91099	4.62104
PARP3	1.48587e-06	2.98124	1.91081	4.65133
RINL	1.69669e-06	2.93986	1.89043	4.57188
ULBP3	1.71668e-06	2.97173	1.90208	4.64289
AKAP9	1.82444e-06	0.342418	0.220489	0.531772
SYTL4	2.20931e-06	2.91351	1.87116	4.53653
PLA2G4A	2.46043e-06	2.97362	1.88971	4.67923
MBTD1	2.46554e-06	0.348085	0.224392	0.539963
MZT1P2	3.30083e-06	0.346549	0.221731	0.541633
SNORA73	3.95824e-06	0.354561	0.228238	0.5508
RNA5SP129	4.72006e-06	0.35998	0.232414	0.557564
RP11-358B23.6	5.62332e-06	0.360329	0.231913	0.559853
RP3-476K8.4	6.70572e-06	0.366669	0.236927	0.567459
RP11-731K22.1	7.04409e-06	0.364796	0.234951	0.566399
CBR1	8.33567e-06	2.7297	1.75512	4.24543
BBIP1	8.55374e-06	0.371314	0.240034	0.574393
CTD-2017D11.1	8.85379e-06	0.366728	0.235602	0.570833
SRSF12	1.02679e-05	0.368304	0.236307	0.574033
BCKDK	1.11824e-05	2.69705	1.73238	4.19889
BATF	1.13432e-05	2.67201	1.72292	4.14392
RWDD4P1	1.21664e-05	0.369917	0.236919	0.577575
MLYCD	1.35061e-05	0.374786	0.240891	0.583103
RP4-814D15.2	1.42741e-05	0.379524	0.245021	0.58786
AC013429.5	1.53892e-05	0.378149	0.243324	0.587679
DIRC3	1.71518e-05	2.66428	1.70434	4.16488
CD37	1.75749e-05	2.61159	1.68499	4.04775
TCTA	1.80856e-05	2.59578	1.67835	4.0147
RP11-169D4.2	1.81402e-05	2.63877	1.69327	4.11222
SPATA9	1.91082e-05	0.382645	0.246333	0.594387
TOMM40L	2.01569e-05	2.57702	1.66766	3.98224
PTPN1	2.09679e-05	2.59142	1.67117	4.0184
PDE3B	2.1407e-05	0.381494	0.244607	0.594985
STIM2	2.17489e-05	2.60593	1.67479	4.05477
IL2RA	2.22356e-05	2.62818	1.68159	4.10761
NUP210	2.22721e-05	2.59807	1.67114	4.03915
RPS6KA1	2.25067e-05	2.56166	1.6581	3.95759
RNU6-415P	2.44278e-05	0.390177	0.252014	0.604084
KANSL1L	2.51455e-05	0.386399	0.248279	0.601356
ATP13A2	2.53699e-05	2.55835	1.65235	3.96113
ZNF124	2.60781e-05	0.391993	0.253347	0.606514
SDHA	2.81833e-05	2.5277	1.63771	3.90134
HTR7	2.8325e-05	2.56535	1.65045	3.98743
RNA5SP354	2.89689e-05	0.389817	0.25066	0.60623
RP11-766H1.1	3.24301e-05	0.393325	0.253293	0.610774
RP11-250B2.3	3.60098e-05	0.395534	0.254741	0.614142
AC005086.1	3.60382e-05	0.396656	0.255802	0.615069
RNU6-1272P	3.73191e-05	0.391987	0.251158	0.611782
PTPRA	3.90311e-05	2.52169	1.62286	3.91835
RP11-97O12.6	3.91087e-05	0.400562	0.259009	0.619475
LPO	4.14845e-05	0.400312	0.258396	0.620172
CREB3	4.15063e-05	2.47668	1.60522	3.82123
PSME1	4.25872e-05	2.50569	1.61397	3.89006
LSM10	4.30983e-05	2.49972	1.61149	3.87752
DESI1	4.40432e-05	2.49334	1.60848	3.86498
ZFYVE19	4.42152e-05	2.48811	1.60657	3.85335
AF064858.11	4.53947e-05	2.57298	1.63373	4.05221
C1QTNF3	4.88813e-05	0.403345	0.260232	0.625163
AC006994.1	5.02248e-05	0.403436	0.260141	0.625665
RP11-87N3.6	5.25435e-05	0.404842	0.261188	0.627506
RHOBTB2	5.45834e-05	2.4725	1.59286	3.83792
RP11-134G8.5	5.67124e-05	2.48273	1.59467	3.86534
RP11-96G10.1	5.69855e-05	0.398754	0.25484	0.62394
HSPD1P11	5.76568e-05	0.406833	0.262476	0.630583
RP11-223P11.3	5.86723e-05	2.4907	1.59589	3.88724
TOX4	5.8851e-05	2.44365	1.58025	3.77878
RP11-571I18.4	5.96461e-05	0.408848	0.264183	0.632732
LRRC37B	6.11639e-05	0.406324	0.261589	0.63114
RP11-1415C14.3	6.13514e-05	0.402998	0.258387	0.628545
SLC9A6	6.19936e-05	2.46341	1.58464	3.82951
RP11-420K14.6	6.2342e-05	0.410045	0.265034	0.634399
RP11-427L15.2	6.25956e-05	0.406402	0.261506	0.631582
DOCK1	6.27356e-05	2.47203	1.58698	3.85068
MVD	6.28271e-05	2.42271	1.57068	3.73694
MTND2P40	6.48084e-05	0.411639	0.266303	0.636291
TSR2	6.49179e-05	2.43853	1.57457	3.77653
RP11-481C4.2	6.60121e-05	0.411825	0.266356	0.636741
RP5-997D24.3	6.71961e-05	0.415226	0.26952	0.639703
SPECC1L	6.76035e-05	2.41263	1.5644	3.72077
MMP7	6.83989e-05	2.43752	1.5721	3.77935
CT45A5	6.87297e-05	2.6289	1.63338	4.23116
ZNF700	6.98542e-05	0.413324	0.267411	0.638855
SERINC5	7.07026e-05	0.411426	0.265495	0.637567
RP11-762E8.1	7.09748e-05	0.41317	0.267151	0.639
LINC00899	7.68351e-05	2.43266	1.56569	3.77968
APOA1BP	7.891e-05	2.41352	1.55837	3.73793
BLOC1S1	7.91192e-05	2.41232	1.55787	3.73541
CSRP1	7.957e-05	2.39906	1.55332	3.70527
RP11-320G10.1	7.99003e-05	0.416419	0.269458	0.643533
DAXX	8.22705e-05	2.3971	1.55131	3.70401
LYPLA2	8.57047e-05	2.38306	1.54507	3.67555
KBTBD8	8.6191e-05	2.39614	1.54908	3.70638
RP11-134G8.7	8.69236e-05	2.4003	1.55007	3.71688
EI24	8.75587e-05	2.40305	1.55066	3.72399
IPO13	8.9881e-05	2.36335	1.53672	3.63462
MYBPHL	9.03802e-05	2.387	1.54416	3.68989
SRPX2	9.10824e-05	2.38479	1.54312	3.68554
LINC01547	9.18558e-05	2.39519	1.54612	3.71052
GNGT2	9.22785e-05	2.45422	1.56482	3.84913
LNP1	9.24253e-05	0.419565	0.271459	0.648477
SRP14	9.35592e-05	2.37937	1.54026	3.67561
DHRSX	9.41158e-05	0.410947	0.262999	0.642121
C10orf128	9.48652e-05	2.41161	1.55004	3.75207
ETFB	9.48755e-05	2.39875	1.54591	3.72207
RP11-114F3.5	9.51768e-05	0.415343	0.267154	0.645731
MYH15	9.61451e-05	2.37746	1.53852	3.67389
SFXN3	9.77223e-05	2.35472	1.53051	3.62278
ENPP7P12	9.80685e-05	0.422289	0.273674	0.65161
SRGAP3-AS2	9.92931e-05	0.420932	0.272261	0.650787
AC090206.1	0.000101272	0.421298	0.272471	0.651418
RP11-378J18.6	0.000101751	0.423189	0.274277	0.652949
AKNAD1	0.000102602	0.423502	0.27452	0.653336
CCDC167	0.000107952	2.37105	1.53161	3.67056
DCSTAMP	0.000108296	2.38235	1.53508	3.69726
RP11-463D19.1	0.000108318	0.4232	0.27382	0.654071
SPATS2L	0.000110025	2.362	1.52793	3.65138
RP11-712P20.2	0.00011063	0.428607	0.278948	0.65856
RP11-351C21.2	0.000111994	0.424618	0.274952	0.655751
UFD1L	0.000113853	2.32904	1.51597	3.5782
NRBP2	0.000115137	2.33476	1.51733	3.59256
SIX3	0.000122757	0.428035	0.277595	0.660006
SYT17	0.000123296	2.35512	1.52093	3.64684
GPR12	0.000124535	0.424041	0.273582	0.657248
S100A4	0.00012473	2.32792	1.51182	3.58455
GRK6	0.000129404	2.33418	1.51226	3.60282
PSMF1	0.000132676	2.33479	1.5114	3.60676
FAM83G	0.000136901	2.33962	1.51158	3.62126
ATP10B	0.000138013	0.428896	0.27753	0.66282
RECK	0.000138866	2.35801	1.51673	3.66593
PACRGL	0.000140155	0.431096	0.279566	0.664757
LGALS1	0.000140349	2.32061	1.50455	3.57931
BNC1	0.000140562	0.429176	0.27766	0.663373
RP3-486I3.7	0.000141078	0.425573	0.274108	0.660734
FAM120AOS	0.000142203	2.35037	1.51331	3.65044
ITPK1	0.000142455	2.32642	1.50574	3.59441
PPP1R7	0.000143987	2.31301	1.50107	3.56412
G6PD	0.000147128	2.33381	1.50667	3.61504
HLA-K	0.00014873	2.34547	1.50983	3.64359
HPS6	0.000149546	2.30973	1.49844	3.56027
DEDD	0.000149876	2.30662	1.49737	3.55322
TREML2	0.000153356	2.32428	1.50191	3.59694
AC211469.1	0.000154203	0.432445	0.280135	0.667566
AC022819.2	0.000154721	0.431107	0.278794	0.666634
SLC35E4	0.000156178	2.29859	1.49311	3.53861
TNFAIP2	0.000156811	2.31628	1.49846	3.58045
CABLES2	0.000157939	2.3157	1.49797	3.57981
KLF13	0.000158125	2.31128	1.49654	3.56957
SIX4	0.000158814	0.430279	0.277772	0.666517
TRIM6	0.000159795	0.4274	0.274905	0.664487
IRF2BPL	0.000161984	2.29958	1.49187	3.5446
RP11-439E19.10	0.000163697	0.433353	0.280548	0.669386
RP11-452H21.1	0.000163978	0.434226	0.281394	0.670066
LRRC37A6P	0.000164575	0.432764	0.279925	0.669052
MIR133A1HG	0.000171353	0.434737	0.28154	0.671295
PSMD14	0.000171428	2.30409	1.49083	3.56098
RNU6-370P	0.000171702	0.436836	0.283594	0.672882
RHOC	0.000172546	2.29511	1.48777	3.54054
TAAR1	0.000173688	2.37118	1.51085	3.7214
SZRD1	0.000173779	2.29386	1.48708	3.53834
MIR181A1HG	0.000174792	0.437045	0.283655	0.673382
AC138649.1	0.000176843	2.30095	1.48852	3.55682
RP11-74E22.3	0.00017736	2.2801	1.48194	3.50816
BPIFB9P	0.000177509	0.435973	0.28247	0.672894
TAS2R43	0.000181697	0.431549	0.277926	0.670087
ACTR1B	0.000188686	2.26965	1.47606	3.48993
DLX5	0.000190775	0.437842	0.283721	0.675684
ZDHHC20P1	0.000200997	2.2829	1.47739	3.52759
PYM1	0.000204374	2.26996	1.47271	3.49882
RP11-171G2.1	0.00020598	0.437342	0.282585	0.67685
UNC13D	0.000209619	2.27508	1.47317	3.5135
LRRC16A	0.000210006	2.28753	1.47688	3.54315
APH1A	0.000210622	2.2564	1.46725	3.46998
BFSP1	0.000211225	2.27677	1.47335	3.5183
DIRC3-AS1	0.000212514	2.29234	1.47782	3.5558
MRPS18A	0.000213359	2.26536	1.46943	3.49242
RN7SL306P	0.000213832	0.440062	0.284959	0.679587
CLCNKA	0.000216772	2.30959	1.48215	3.59897
SIAH1	0.000216963	0.442703	0.287455	0.681797
RNU6-522P	0.000219619	0.446746	0.291377	0.684961
SH3TC2	0.000221008	2.28394	1.47353	3.54007
DCTN2	0.000221147	2.2644	1.46757	3.49387
AC092597.3	0.000223204	0.44439	0.288891	0.68359
FNDC3B	0.000224221	0.438192	0.282706	0.679195
AC114271.2	0.000225649	2.26238	1.46607	3.4912
RP11-332H18.5	0.000226594	0.442979	0.287357	0.682878
CTD-2620I22.2	0.000226962	2.27514	1.46969	3.52202
ARHGAP4	0.000230792	2.25084	1.46158	3.46629
LINC00674	0.000231278	0.441033	0.285251	0.681891
PPFIA2	0.000231861	0.447264	0.291428	0.686432
TRH	0.000238206	0.444872	0.288809	0.685266
AVPR1B	0.000238391	0.443285	0.287224	0.68414
GTF2IP1	0.00023875	0.444876	0.288794	0.685316
SLC25A1	0.000239414	2.2539	1.4609	3.47735
TAS2R13	0.000240838	0.447806	0.29164	0.687596
MIR550A2	0.000241521	0.437666	0.281548	0.680353
DDIT4	0.00024335	2.25472	1.46043	3.48101
H3F3A	0.0002469	0.444952	0.288578	0.686064
RP5-1027G4.3	0.000247096	0.44567	0.289285	0.686595
PDE7B	0.000247447	2.26384	1.46243	3.50442
RP11-539G18.1	0.000247465	0.445887	0.289488	0.686781
ACOT7	0.000247542	2.24018	1.45529	3.4484
SH3TC1	0.00025103	2.26032	1.46073	3.49759
AF064858.8	0.000262883	2.24349	1.45363	3.46253
RP11-142O6.1	0.000263239	0.448822	0.291874	0.690163
PREX1	0.000265392	2.26793	1.46051	3.52171
ECE1	0.000265877	2.2466	1.45406	3.47113
VSTM4	0.000269081	2.26136	1.45793	3.50754
OLFML2A	0.000270405	2.23564	1.45002	3.44691
TMBIM1	0.000273824	2.24341	1.45179	3.46668
RP11-322E11.3	0.000273837	0.447385	0.29009	0.689971
ANAPC16	0.000275572	2.23678	1.44952	3.4516
RP11-303G3.6	0.000276925	0.450981	0.293584	0.69276
COX11P1	0.000282479	0.445166	0.287602	0.689052
ARF3	0.000286421	2.25104	1.45203	3.48972
RPL7AP10	0.000287344	0.44184	0.284148	0.687047
SORT1	0.000290837	2.22721	1.44427	3.4346
RP3-510O8.4	0.000292344	2.21967	1.44179	3.41724
CDC42SE1	0.000293908	2.21174	1.43919	3.39899
AC010983.1	0.000294803	0.453748	0.295798	0.696038
RP4-737E23.5	0.000297491	2.23056	1.44425	3.44498
RP11-513M16.7	0.000298847	0.450869	0.292787	0.694302
HHIP	0.000299583	0.450483	0.292378	0.694082
ARFGEF1	0.000299677	0.448048	0.289942	0.692369
STK26	0.000300133	0.44834	0.29022	0.692608
RPL23AP40	0.000304454	0.447286	0.289039	0.692172
AC009237.8	0.000304788	2.22822	1.44246	3.442
RP11-182J1.5	0.000311841	0.448751	0.290283	0.693728
C10orf54	0.000317035	2.21354	1.43635	3.41125
CTC-379B2.4	0.00031885	0.450315	0.291643	0.695314
HECTD3	0.000319191	2.20891	1.43468	3.40095
PGAM1P10	0.000321407	0.451484	0.29274	0.69631
HDAC11	0.00032152	2.20189	1.43228	3.38505
ATP2B3	0.000322875	0.448327	0.289542	0.694189
METTL7B	0.000326273	2.23191	1.44046	3.4582
SNN	0.000334168	2.22336	1.43686	3.44036
RP11-346C16.1	0.000338297	0.454321	0.295114	0.699417
ETS2	0.000339093	2.20384	1.43047	3.39534
EMP3	0.000341098	2.20349	1.4301	3.39513
PSMD1	0.000343573	2.21312	1.4326	3.41889
PEF1	0.000344546	2.1908	1.42591	3.36599
RNU6-1053P	0.000345004	0.452757	0.293362	0.698758
GRINA	0.000346404	2.20824	1.43079	3.40812
RP11-266L9.6	0.000346517	0.453538	0.294104	0.6994
AC006538.1	0.00034811	0.449516	0.290034	0.696691
KNOP1P4	0.000350411	0.452507	0.292966	0.698929
RP11-423E7.1	0.000354798	0.450334	0.290675	0.697689
SIGMAR1	0.000356081	2.19478	1.4256	3.37896
SELPLG	0.000357784	2.19841	1.42645	3.38813
Six3os1_4	0.000359951	0.360637	0.205945	0.631526
AC137932.4	0.000363441	0.451721	0.291838	0.699197
SEL1L3	0.000368946	2.18848	1.42216	3.36774
HTR1F	0.000369817	2.2424	1.4377	3.49751
JPH4	0.00037013	2.22839	1.43361	3.46377
RPL36AP48	0.000371628	0.452163	0.29207	0.700006
MTMR7	0.000372552	0.454558	0.29445	0.701726
CIAPIN1P	0.000376945	0.455441	0.295227	0.702602
CD52	0.000377964	2.23139	1.4335	3.47339
ANXA11	0.000379018	2.18715	1.42055	3.36744
DUSP7	0.000389667	2.2109	1.42617	3.42743
RP1-12G14.9	0.000391645	0.454909	0.294328	0.7031
PRH2	0.000393099	0.45895	0.298363	0.70597
STARD4-AS1	0.000393717	0.456044	0.295419	0.704003
PLEKHA6	0.000394842	2.22583	1.42985	3.46494
ZNF385A	0.000395209	2.1925	1.42019	3.38477
MAP2K1	0.000397636	2.17493	1.41482	3.34342
RNASEH2B	0.000400283	0.457822	0.297051	0.705605
SUCO	0.000406408	0.453875	0.292937	0.703232
TADA3	0.000407371	2.18168	1.41568	3.36217
PRRT4	0.000410206	0.454958	0.293935	0.704193
RPL7AP60	0.000410716	0.452883	0.291841	0.70279
AL672296.1	0.000411305	0.453002	0.291947	0.702905
ITPR2	0.000412352	0.459769	0.29873	0.707618
LLNLR-304A6.1	0.000413756	0.460994	0.299936	0.708535
MFNG	0.000417636	2.1828	1.41486	3.36755
MRPL49	0.000422115	2.1717	1.41117	3.34211
AGPAT3	0.000424346	2.19328	1.41713	3.3945
RAPGEF2	0.000430331	2.1765	1.41167	3.35571
RP11-700A24.1	0.000432511	0.461574	0.300094	0.709947
LRP10	0.000437225	2.16933	1.40887	3.34025
RP11-2E11.6	0.000441641	0.458555	0.29684	0.708371
IL12RB1	0.000444595	2.19385	1.41512	3.40111
EFNB3	0.000446312	0.459203	0.297391	0.709059
AGTPBP1	0.000449245	0.460821	0.29896	0.710313
SF3A1	0.000449719	2.16638	1.40673	3.33624
RP11-167P20.1	0.000450018	0.460655	0.298776	0.71024
PLBD2	0.000453412	2.17156	1.40784	3.3496
ELF2	0.000453586	0.457157	0.29517	0.70804
C6orf183	0.000455649	2.18284	1.41083	3.3773
ISG20L2	0.000460292	2.18622	1.41131	3.38659
MAP3K6	0.000460371	2.15244	1.40166	3.30536
SDHAP3	0.000466141	2.16684	1.40521	3.34128
BMP5	0.000470016	0.463593	0.301323	0.71325
DDX3P2	0.000470546	0.462962	0.300671	0.712849
RP11-423E7.2	0.000471841	0.464509	0.302214	0.71396
KLHL12	0.000477633	2.14943	1.39911	3.30213
CTD-2310F14.1	0.000477958	0.458683	0.296192	0.710317
ZNF443	0.000479859	0.460712	0.298201	0.711788
SLC14A1	0.00048078	0.456387	0.293822	0.708894
ZNF861P	0.000484084	0.46152	0.298931	0.712543
RP11-546B15.1	0.000486374	0.45935	0.296691	0.711185
LINC00152	0.000487321	2.16735	1.40328	3.34744
AC108004.1	0.000487808	0.385694	0.225789	0.658843
RN7SL141P	0.000492364	0.465219	0.302511	0.71544
ATP12A	0.00049391	0.462436	0.299657	0.713639
SYT11	0.000495748	2.16105	1.40069	3.33415
TRIM24	0.000496029	0.46315	0.300338	0.714223
RP11-17P16.1	0.000502987	0.466604	0.303706	0.716877
GOT1	0.000504313	2.15323	1.39768	3.31721
MIRLET7BHG	0.000504446	2.16637	1.40138	3.34894
PLD1	0.00050453	0.456923	0.293882	0.710417
CENPV	0.000508124	0.462768	0.299709	0.71454
AC007191.4	0.000511508	0.467129	0.30407	0.717627
NUDT16	0.000512784	2.15068	1.39618	3.31292
CTD-2240J17.1	0.000513849	0.463924	0.300768	0.715586
DDX3P1	0.000518926	0.465732	0.302504	0.717035
VPS16	0.000521999	2.13209	1.39009	3.27015
ZFHX3	0.000527051	0.459415	0.295953	0.713163
CTD-2006C1.12	0.000527263	0.464952	0.301551	0.716895
RP11-348N5.7	0.000530109	0.467208	0.30379	0.718534
FTSJ2	0.000530514	2.14672	1.39348	3.30712
MIPEPP3	0.000535463	0.463231	0.299649	0.716114
RNA5SP210	0.00053564	0.469262	0.305778	0.720152
COMTD1	0.0005359	2.13636	1.39008	3.28328
SRC	0.000536806	2.15971	1.39658	3.33985
UCA1	0.00053778	0.465342	0.301746	0.717632
RNVU1-1	0.000541523	0.467173	0.303537	0.719023
AC006116.14	0.000545504	0.465777	0.302043	0.718268
RP11-977G19.10	0.000546112	2.17484	1.39999	3.37854
SLC35G1	0.000546718	2.13778	1.38955	3.2889
SARS	0.000546813	2.13489	1.38873	3.28194
FAM170B-AS1	0.000548534	2.13921	1.3898	3.29272
CLDN10-AS1	0.000552743	0.458663	0.294712	0.713821
RP11-344N10.4	0.00055354	0.469784	0.305975	0.721291
B4GALT1	0.000555472	2.15128	1.3926	3.3233
RP11-49I11.1	0.000563562	2.13309	1.38682	3.28095
SLC18A2	0.00056392	0.466332	0.302267	0.719447
MIB1	0.000570769	0.466776	0.302595	0.720038
RP1-137K2.2	0.000572309	0.469918	0.305769	0.722188
LMNA	0.000572647	2.14252	1.38871	3.30552
CTA-363E19.2	0.000586717	0.469132	0.30471	0.722276
NABP2	0.000586916	2.1327	1.3848	3.28451
FAM207BP	0.000591798	2.1226	1.3816	3.26105
TIGAR	0.000594633	2.14033	1.38631	3.30446
RP3-403A15.1	0.000595125	0.470159	0.30561	0.723304
ZNF445	0.000595253	0.466424	0.301803	0.720838
ARHGEF35	0.000597096	2.1427	1.38677	3.31067
SEC31A	0.000600744	0.462732	0.297964	0.718613
CCND2	0.000605147	0.46753	0.302757	0.72198
CLIC6	0.000606993	2.17712	1.39548	3.39656
COMMD7	0.000608235	2.12478	1.38092	3.26936
RUFY3	0.00061075	0.468222	0.303365	0.722666
AF064858.10	0.000611906	2.1495	1.38748	3.33002
MRPS31P4	0.000614616	0.469172	0.304268	0.72345
RPL9P32	0.000620366	0.472773	0.30785	0.72605
ADGRE5	0.000620485	2.11714	1.37785	3.25309
RP11-369F10.2	0.000620647	0.472553	0.30762	0.725917
TUFT1	0.000621874	2.13615	1.38302	3.29939
RP11-3D4.4	0.000639713	0.469578	0.304261	0.724717
TBCC	0.000640615	2.1307	1.38009	3.28955
TRAT1	0.000640793	0.471872	0.306587	0.726265
PMVK	0.000646662	2.11955	1.37657	3.26354
RP11-640N20.4	0.000650424	0.470292	0.304815	0.725603
KRI1	0.000657078	2.11311	1.37403	3.24972
MIR643	0.000657263	0.469793	0.304195	0.72554
AP000908.1	0.000660534	0.473423	0.307853	0.72804
IGHD6-25	0.000664588	2.13396	1.37922	3.3017
ST6GALNAC4	0.000665237	2.11564	1.37414	3.25726
AIFM2	0.000667044	2.14133	1.38106	3.32013
ZNF3	0.000667453	0.469006	0.303229	0.725413
AC024896.1	0.000670662	0.472372	0.306615	0.727737
PSMB8	0.000671146	2.11591	1.3738	3.25891
RP11-38J22.3	0.000674674	0.469974	0.304102	0.726321
BCL2A1	0.000678256	2.11419	1.37282	3.25593
SNORA38	0.000687942	0.473129	0.307119	0.728876
ABHD11	0.000688866	2.11254	1.37162	3.25367
HSPA1B	0.000690863	2.10586	1.36965	3.2378
RNU6-553P	0.000691975	0.472444	0.306355	0.728578
AIFM1	0.000699841	2.10665	1.36925	3.24116
EIF2B1	0.000702117	2.10117	1.3676	3.22823
TFEB	0.000703758	2.11701	1.37182	3.267
RP11-483P21.6	0.000703857	0.474357	0.308132	0.730256
RP11-532F6.2	0.000704937	0.476095	0.309898	0.731421
CPNE8	0.00070816	2.10657	1.36867	3.2423
GDAP1	0.000708476	2.1027	1.36759	3.23295
HSD17B1	0.00071709	0.47417	0.307738	0.730611
ZNF491	0.000717854	0.47568	0.309276	0.731616
MIR3160-2	0.000720817	0.473998	0.307507	0.730633
ECHS1	0.000720883	2.10532	1.36747	3.24127
PTPN13	0.000725272	0.475031	0.308499	0.731459
RP11-54O7.16	0.000735123	0.472544	0.305805	0.730197
ZBTB38	0.000736925	2.12686	1.37226	3.2964
RP11-527L4.9	0.000739051	2.13578	1.37453	3.31862
DHX36	0.000739638	0.479051	0.31242	0.734554
DFNB59	0.000742199	0.474245	0.307443	0.731546
SPDYE12P	0.000742842	0.471721	0.30485	0.729934
KMT2E	0.000744923	0.472901	0.306027	0.730772
SCARNA24	0.00075083	0.47499	0.30808	0.732326
RP11-49K24.3	0.00075093	2.10553	1.36557	3.24647
RP11-16K12.2	0.000753347	0.477288	0.310404	0.733893
AC006014.8	0.000753528	0.478214	0.311355	0.734495
MRPS31P5	0.000754272	0.474104	0.307123	0.731873
FXR1	0.00075472	0.475387	0.308432	0.732717
ZNRF2P2	0.000760082	0.474028	0.306961	0.732024
SNAPIN	0.000760354	2.09497	1.3621	3.22217
OSMR	0.00076144	0.474019	0.306932	0.732065
RP11-28G8.1	0.00076721	0.478525	0.311478	0.735159
UBE2Q1	0.000771069	2.0996	1.36268	3.23504
SLC35F5	0.000775424	0.473714	0.30642	0.732344
STK10	0.000775822	2.11143	1.36558	3.26466
RP13-143G15.4	0.000776189	2.11217	1.36575	3.26652
TELO2	0.000788795	2.08004	1.35629	3.19002
HRH1	0.000795462	2.10151	1.36168	3.24331
RP11-201O14.2	0.000796563	0.475893	0.308358	0.734451
OR9A2	0.000804634	0.478033	0.310447	0.736086
ZC3HAV1L	0.000809264	0.477996	0.310345	0.736213
RRAGA	0.000809597	2.09697	1.3596	3.23425
KLHL24	0.000818721	0.479289	0.311548	0.737344
ARHGAP10	0.000820126	0.477061	0.309236	0.735967
ALAS1	0.000823448	2.0845	1.35542	3.20575
RP11-126O1.5	0.000825655	2.11129	1.36247	3.27165
CD46P1	0.000830109	0.477414	0.309464	0.736513
RP11-239H6.2	0.000833503	0.480128	0.312214	0.73835
RP11-567M16.5	0.000834757	0.480448	0.312528	0.738593
CFAP45	0.000835966	2.09194	1.35669	3.22566
KCTD17	0.000836058	2.09178	1.35664	3.22528
CTD-2533G20.1	0.000838639	0.41043	0.243367	0.692174
NFX1	0.000842486	2.09452	1.357	3.23288
MPV17L	0.000848692	2.08986	1.35539	3.22233
RP1-164L12.1	0.000854469	0.479362	0.311146	0.738522
CTB-181H17.1	0.00085521	0.481876	0.313732	0.740139
PARVB	0.000859522	2.07975	1.35207	3.19907
PDCD6IPP1	0.000861808	2.10419	1.35846	3.25928
CCDC6	0.000863461	2.08585	1.35348	3.2145
RP11-484N16.1	0.000865863	0.483094	0.314851	0.741237
EEF1A1P3	0.000871161	0.481821	0.313466	0.740595
KCTD15	0.000876017	0.478858	0.310347	0.738868
SRSF10P1	0.00088523	0.475275	0.306547	0.736873
RP5-942I16.1	0.000885476	0.481564	0.313016	0.740867
RP11-448G4.4	0.000887989	0.48469	0.316221	0.742913
SUCLG1	0.000891068	2.07569	1.34923	3.19329
SOX9	0.000892748	0.474984	0.306154	0.736918
UNCX	0.000894361	0.483498	0.314905	0.742354
SLC48A1	0.000895686	2.07627	1.34913	3.19531
RP5-837I24.1	0.000903078	2.06092	1.34464	3.15877
MRPS12	0.000904849	2.07994	1.34961	3.20548
PCSK2	0.000908327	0.480695	0.311831	0.741004
RNU1-32P	0.000909314	2.04901	1.34112	3.13055
TINF2	0.000914094	2.06756	1.34582	3.17637
SNORA68	0.000914655	0.48169	0.312779	0.741819
IGDCC4	0.000915764	0.481568	0.312639	0.741774
ANGPTL3	0.000918304	0.484045	0.315171	0.743407
F12	0.000919623	2.0677	1.34556	3.1774
RP11-815J4.7	0.000920841	2.07733	1.34806	3.20115
RP11-107K17.2	0.000922776	0.48346	0.314509	0.74317
CLEC5A	0.000923192	0.479761	0.310683	0.740855
MIR345	0.000926709	0.476184	0.30696	0.738698
CTA-339C12.1	0.000927241	0.484425	0.315453	0.743906
ACTR1A	0.000927302	2.0628	1.34385	3.16638
TERF2	0.00093311	2.06943	1.34531	3.18332
CTD-2349P21.10	0.000941135	0.486216	0.317141	0.745427
HSPA8P19	0.000944724	0.486154	0.317033	0.745491
DLG1	0.000948105	0.486699	0.317559	0.745928
DLK1	0.000950417	0.48304	0.313736	0.743706
ADSS	0.000954607	0.481528	0.312123	0.742879
PPATP2	0.000956158	0.485001	0.315699	0.745097
KCNIP4	0.000956757	0.484719	0.315399	0.744938
KCNMB1	0.00095692	2.08095	1.34711	3.21455
MED9	0.000957483	2.08705	1.34868	3.22966
NDFIP1	0.000958884	2.07924	1.34656	3.21059
CCDC146	0.000960109	0.48337	0.313962	0.74419
PIK3IP1	0.000961762	2.08163	1.34704	3.21683
FRMD6	0.000962634	0.483173	0.313727	0.744138
RSL24D1P8	0.000966185	0.48171	0.312172	0.743323
AC004941.3	0.000967241	0.483215	0.313716	0.744295
RNA5SP277	0.000968779	0.485729	0.316302	0.745908
TRAV31	0.00097121	0.483164	0.313615	0.744375
C6orf1	0.000973002	2.05639	1.33981	3.15624
PHB	0.000977396	2.06095	1.34079	3.16792
AKAP12	0.00098754	0.483232	0.313493	0.744875
RP11-452H21.2	0.000991669	0.48436	0.314613	0.745693
AC020951.1	0.000991998	0.483341	0.313553	0.745067
FXYD2	0.000995068	2.06767	1.34168	3.18652
ARF6	0.00099537	2.06184	1.34013	3.17223
HMOX2	0.00100183	2.05092	1.33694	3.1462
PTPN9	0.00100496	2.07051	1.34193	3.19466
UNC45A	0.00100725	2.0515	1.33683	3.14825
TRAP1	0.00101217	2.0582	1.33835	3.16524
HNRNPA3P1	0.00101393	0.485156	0.31518	0.7468
ALDOC	0.00101422	2.05921	1.33851	3.16796
FREM3	0.0010167	2.09495	1.34772	3.25648
PDLIM2	0.00101921	2.05535	1.33726	3.15905
RP11-1023L17.1	0.0010205	0.485557	0.31552	0.747227
MIR128-2	0.00102604	0.426489	0.256437	0.709308
AC005071.3	0.00102814	0.484683	0.314527	0.746891
GALNT12	0.00102862	2.05416	1.33649	3.15719
NBAT1	0.00102881	0.486716	0.316629	0.74817
AC007327.5	0.00103015	0.488552	0.318524	0.749341
NCDN	0.00103218	2.04875	1.3349	3.14432
H2AFZP4	0.00103254	0.487649	0.317557	0.748847
FBXW4	0.00103391	2.06128	1.3381	3.17529
SNRPCP16	0.00103726	0.486992	0.31682	0.748567
RP11-301G19.1	0.00103815	2.05173	1.3354	3.1523
DPY19L2P3	0.00103821	0.483006	0.312677	0.74612
RNU4-5P	0.00103922	0.486545	0.316334	0.748343
SNAP47	0.00104156	2.04409	1.33324	3.13395
CHL1	0.00104377	0.486575	0.316314	0.748482
SRMP2	0.00104569	0.484743	0.314391	0.747399
HNMT	0.00104978	2.06084	1.33723	3.17601
AC008937.2	0.00105261	0.488594	0.318314	0.749963
MPZL3	0.00105797	2.06265	1.33731	3.18139
ANKRD33B-AS1	0.00106285	0.48838	0.317978	0.7501
KRR1P1	0.00106323	0.488154	0.317738	0.749971
MIR8057	0.00106584	0.48626	0.315741	0.74887
RP11-716H6.1	0.00106825	0.462014	0.29092	0.73373
RPL10AP1	0.00106882	0.484024	0.313389	0.747565
RP11-451B8.1	0.00107237	2.08078	1.34133	3.22787
SUCLG2P2	0.00107416	2.0721	1.339	3.20656
GSK3A	0.00107533	2.05658	1.33492	3.16838
RP11-248J23.6	0.00107565	0.486392	0.315769	0.749208
NAPSB	0.00107967	2.06099	1.33586	3.17971
RP11-136C24.3	0.00108282	0.484258	0.313478	0.748076
NECAP2	0.00108442	2.04399	1.33122	3.13838
HINT2	0.00108444	2.05243	1.33342	3.15913
MCF2L	0.00108723	0.488031	0.317347	0.750517
PEX11B	0.00109011	2.04334	1.3308	3.1374
SCML2P2	0.00110016	0.488966	0.318179	0.751423
FGF13-AS1	0.00110017	0.451447	0.280013	0.727839
RPL23AP17	0.00110204	0.489911	0.319145	0.752051
CDK3	0.001105	0.486737	0.315809	0.750177
RP11-642A1.2	0.00110882	0.489041	0.318164	0.751689
RP11-214O1.1	0.00111418	0.488982	0.318046	0.751788
CTB-78O21.1	0.00111606	0.48788	0.316879	0.75116
ZCCHC4	0.00111716	0.490443	0.319537	0.752759
RP11-589F5.4	0.00112422	0.490178	0.319185	0.752773
CTSE	0.00113179	0.489831	0.318744	0.75275
KIR2DS4	0.00114727	2.03845	1.32699	3.13135
RUFY2	0.00115317	0.484941	0.313438	0.750286
ACTR10	0.00115633	2.04644	1.32866	3.15198
DTD1	0.00116332	2.05337	1.33014	3.16984
CD300C	0.00116385	2.04877	1.32893	3.15853
RASA3	0.00116391	2.06235	1.33241	3.19215
SENP5	0.00116412	0.487809	0.316301	0.752313
PMS2CL	0.00116478	0.489289	0.317834	0.753234
PPIF	0.00116559	2.05393	1.33018	3.17147
DSC1	0.00116574	0.487196	0.315648	0.751978
RP11-242D8.3	0.001167	0.486333	0.314738	0.751481
ARHGEF1	0.00118249	2.03096	1.32355	3.11646
RNU6-430P	0.0011926	0.484919	0.313011	0.75124
LBR	0.00119692	0.49093	0.319218	0.75501
RP4-756H11.5	0.00119985	2.05387	1.3287	3.17482
RP11-608O8.2	0.00120903	0.490037	0.318164	0.754756
TAGLN2	0.00121912	2.02999	1.32178	3.11767
GUCY1A2	0.00122613	0.491821	0.319855	0.756242
RP1-28C20.1	0.00122746	0.490726	0.318699	0.75561
WBP1L	0.00123472	2.03263	1.32182	3.1257
CASP1	0.00123804	2.03863	1.32321	3.14084
RP11-875O11.3	0.00124792	2.03508	1.32191	3.13302
ARPP21-AS1	0.00124879	0.491607	0.319408	0.75664
RP11-667K14.9	0.0012502	0.494829	0.322766	0.758616
STAT6	0.00125175	2.02186	1.31837	3.10073
ARMC12	0.00125278	2.02634	1.31948	3.11188
LCMT2	0.00126052	2.04987	1.32516	3.17092
AC006129.1	0.00126613	2.05124	1.32527	3.17488
RP11-716H6.2	0.00126706	0.459806	0.286683	0.737475
PSMA7	0.00126753	2.02672	1.31899	3.1142
MTCO3P44	0.0012698	2.03199	1.32024	3.12745
OTUB1	0.0012761	2.01776	1.31636	3.09288
RP11-480I12.2	0.00127623	0.488494	0.315899	0.75539
CTC-463A16.1	0.00129247	2.04868	1.32357	3.17104
ZNF385C	0.00129868	0.487286	0.314429	0.755171
MYH9	0.00130139	2.02332	1.31679	3.10894
MTCYBP24	0.00130147	0.492689	0.320033	0.758494
VPS37A	0.00130627	0.490332	0.317527	0.757183
LYPD5	0.00130762	2.02275	1.31641	3.10809
AC019117.2	0.00131217	2.03118	1.31837	3.1294
DCAF11	0.00131753	2.03019	1.31791	3.12743
RP11-517P14.2	0.00132341	2.04442	1.32127	3.16335
ATP6V0E2	0.00133431	2.01976	1.31463	3.10312
CIAPIN1	0.00133497	2.01569	1.31357	3.09309
STAG3L2	0.00133616	0.489251	0.316121	0.757199
ITGAX	0.00133965	2.0199	1.31446	3.10394
BCAN	0.00134009	2.03261	1.31765	3.1355
LRRC9	0.00134622	0.494153	0.321145	0.760362
RIPK3	0.00134858	2.01934	1.31398	3.10333
FAM215A	0.00134979	2.01958	1.314	3.10405
ID1	0.00135243	2.02565	1.31543	3.11933
FBXO34	0.00136518	2.0207	1.3137	3.10819
RER1	0.00136905	2.01106	1.31113	3.08465
SKI	0.00137165	2.01693	1.31251	3.0994
SMURF2	0.00137277	0.493231	0.319938	0.760387
RP11-365F18.3	0.00137608	0.494086	0.320803	0.76097
NCALD	0.00138905	2.02787	1.31462	3.12809
RBM17	0.00139175	2.02324	1.31336	3.11683
IRAK1BP1	0.00139191	0.496862	0.323571	0.76296
HIRIP3	0.00139382	2.03122	1.31528	3.13685
TRIM32	0.00139604	2.01743	1.31174	3.10276
STIP1	0.00139888	2.02131	1.31261	3.11265
ZNF69	0.00140156	0.495003	0.321534	0.76206
RP11-649A18.4	0.00140689	0.49346	0.319871	0.761255
RP6-109B7.5	0.00141483	2.02487	1.31292	3.12289
ZNF107	0.00141981	0.493988	0.320308	0.761841
BCL9	0.00142282	2.01526	1.31023	3.09968
PRICKLE4	0.00142408	2.00099	1.3066	3.06443
HGF	0.00142933	0.491858	0.317997	0.760774
ULBP1	0.00143509	2.01048	1.30859	3.08885
CTD-2033D15.3	0.00143632	2.02451	1.31206	3.12384
RP11-439E19.6	0.00143875	0.498452	0.324827	0.764883
ARPC5L	0.00144385	2.02034	1.31074	3.11408
C14orf37	0.00144638	0.492586	0.318609	0.761565
CTC-490G23.2	0.00145654	2.02197	1.3107	3.11923
CNNM1	0.0014714	2.01624	1.30875	3.1062
RP11-454F8.4	0.00147418	0.499761	0.325897	0.766379
CTD-2017D11.2	0.00147709	0.498696	0.324751	0.765812
GPN2	0.00147717	2.00116	1.30478	3.0692
LL21NC02-1C16.1	0.00148677	2.01414	1.30769	3.10224
LAP3	0.00149955	2.01398	1.30721	3.10289
TRBV7-1	0.00149976	0.497983	0.323806	0.765849
TSSC1	0.0015009	2.0055	1.30505	3.08189
RP11-504G3.2	0.00150191	0.49352	0.319108	0.76326
SLC6A6	0.00150683	2.00373	1.30441	3.07796
HLA-F-AS1	0.00150998	2.02951	1.31069	3.14255
AC127904.2	0.00151216	0.494933	0.3205	0.764301
TWF2	0.00151407	2.00456	1.30437	3.08062
RP11-504I13.2	0.00151495	0.501297	0.32717	0.768097
PIGFP1	0.00151556	0.496218	0.321819	0.765127
CTC-425O23.2	0.00151674	0.496418	0.322019	0.765268
SGMS2	0.00152008	2.01185	1.30598	3.09924
MED29	0.00152483	1.99749	1.30225	3.0639
SLC29A2	0.00152513	1.99837	1.30246	3.0661
RP1-300G12.2	0.00152655	0.498976	0.324626	0.766967
CTD-2006C1.13	0.00152767	0.494384	0.319795	0.764288
SSBP4	0.00153003	1.99871	1.30238	3.06733
HTATIP2	0.00153577	1.99999	1.30251	3.07097
FAM53B	0.00153775	2.00023	1.3025	3.07173
AC012512.1	0.00154276	2.01765	1.30664	3.11556
COQ9	0.00154381	1.99493	1.30098	3.05904
DPP3	0.00154459	1.9957	1.30115	3.061
ARL2BP	0.00155069	2.00477	1.30319	3.08404
RP11-715J22.4	0.00155776	0.498907	0.324293	0.76754
TAS2R31	0.00155818	0.501059	0.326559	0.768807
CAPN1	0.00155947	1.99893	1.30146	3.07018
CYP3A5	0.0015629	0.499172	0.32453	0.767796
GHRLOS	0.00156448	0.500097	0.325492	0.768367
CACNA1C-IT3	0.00156449	0.497007	0.32224	0.766558
RP11-349G13.1	0.00156482	0.498245	0.323539	0.767291
SLC29A4	0.00158044	0.49828	0.323447	0.767614
C19orf84	0.00158263	2.00206	1.30147	3.07977
CCL22	0.00158366	2.01953	1.30574	3.12353
RP11-820K3.3	0.00159701	0.500306	0.325447	0.769117
RN7SL663P	0.00160455	0.497006	0.321913	0.767334
SLC12A8	0.00160628	2.00451	1.30131	3.08772
AL160037.1	0.00161154	2.01498	1.3037	3.11432
RNU11-3P	0.00161927	0.50029	0.32525	0.769531
RP11-330L19.2	0.00161937	0.502296	0.327367	0.770698
GPR78	0.00162289	0.499758	0.32466	0.76929
KIR2DL1	0.00162739	1.99125	1.29737	3.05625
HOPX	0.00163222	2.0191	1.30404	3.12625
THAP4	0.00163284	1.99495	1.2981	3.06587
RP5-849H19.3	0.00163768	0.503171	0.328147	0.77155
FRMD8	0.00164412	2.00457	1.30011	3.09075
DPRXP1	0.00164684	0.499549	0.32425	0.769619
ABCC9	0.00164881	0.500682	0.325428	0.770314
AC013267.1	0.00166049	0.501361	0.326053	0.770926
KCNJ16	0.00166195	2.02458	1.30441	3.14234
PSMD13	0.00166212	1.98838	1.29557	3.05167
SNORD112	0.00166943	0.501389	0.326013	0.771108
CYP4F24P	0.00167918	0.503166	0.327814	0.772315
NREP	0.00168219	0.502074	0.326637	0.77174
SNORA9	0.00169136	0.50302	0.327565	0.772454
PSMD3	0.00169223	1.98851	1.29467	3.05418
THBS1	0.00169524	1.99405	1.29594	3.06823
DNAJB13	0.00169883	2.01713	1.30144	3.12641
CCRL2	0.00170496	2.00933	1.29936	3.10724
LPCAT1	0.001706	1.98676	1.29383	3.05081
RP11-54O7.1	0.00170646	0.497099	0.321209	0.769304
VWA5A	0.00171028	1.99389	1.29544	3.06892
RP11-505K9.4	0.00171475	0.503445	0.327834	0.773125
MIR1285-1	0.00171663	0.503902	0.328304	0.773422
INTS4P2	0.00171729	0.503025	0.327371	0.772929
RP11-213G2.3	0.00172014	0.499734	0.323876	0.771081
AF064858.7	0.00172732	1.9924	1.29456	3.06643
RP5-1165K10.2	0.00173399	0.502242	0.326415	0.772779
ZNF19	0.00173612	0.50157	0.32569	0.77243
CTD-2026D20.2	0.00173785	0.502808	0.326984	0.773174
YEATS2-AS1	0.00173819	0.500876	0.324941	0.772067
CTD-3010D24.3	0.00174104	0.503143	0.327314	0.773424
KIT	0.0017435	0.504284	0.328503	0.774123
GS1-259H13.7	0.00174536	0.501773	0.325834	0.772713
ESRRAP2	0.0017504	0.504352	0.328524	0.774286
NEDD8	0.00175453	1.97938	1.29057	3.03582
AC092171.2	0.00175614	0.504337	0.328464	0.774379
SUMO2P20	0.00177053	0.500915	0.324739	0.772669
RP3-406P24.3	0.00177342	0.501049	0.324859	0.772797
DEF6	0.00177464	1.98803	1.29208	3.05884
C10orf35	0.00177758	1.99152	1.29284	3.06779
RN7SL617P	0.00177882	0.498889	0.322543	0.771649
C18orf25	0.00178636	0.503808	0.327678	0.77461
XXbac-BPG181M17.5	0.00179159	2.00106	1.29473	3.09274
TARSL2	0.001828	0.50194	0.325396	0.774267
TRAV41	0.00183072	0.504868	0.328473	0.775987
AP000345.1	0.00183565	0.50364	0.327137	0.775372
ZSCAN25	0.00183643	0.504655	0.328206	0.775964
RP11-84A19.4	0.00183675	0.501877	0.325266	0.774383
SMAD3	0.00183954	1.9814	1.28859	3.0467
VNN1	0.00184137	1.98642	1.28975	3.05939
RIF1	0.00184182	0.506366	0.329982	0.777032
GNB1L	0.00184829	0.497616	0.320696	0.772139
LA16c-306A4.1	0.00184914	0.5052	0.328691	0.776493
RP11-517H2.6	0.00185535	0.501967	0.325227	0.774756
HMX2	0.00185577	2.12503	1.32195	3.41598
RNF7	0.00185967	1.97257	1.28589	3.02594
AC004893.10	0.00186063	0.505549	0.328979	0.776888
AE000661.36	0.00186792	0.505818	0.329211	0.777165
UBL4A	0.00187586	1.97374	1.28572	3.02993
RNU6-306P	0.00188279	0.505504	0.328772	0.777238
SCARNA7	0.00189192	0.507853	0.331202	0.778723
KIZ-AS1	0.00189448	0.507135	0.330421	0.77836
PNPLA6	0.00190308	1.97195	1.28454	3.02724
AC000089.3	0.00190409	0.501417	0.324298	0.775272
TAPBPL	0.00190442	1.97944	1.2863	3.0461
USP30	0.0019107	0.50442	0.327425	0.777092
FAM213A	0.00191481	1.99005	1.28854	3.07346
ATP5G3	0.00191808	1.97851	1.2857	3.04465
VPS33B	0.00191867	1.96822	1.28321	3.01891
SMIM12	0.00192013	1.9693	1.28343	3.02171
IL33	0.00192635	0.506008	0.328999	0.778253
RNA5SP372	0.00192711	0.508861	0.332026	0.779878
RNA5SP437	0.00192768	0.507543	0.330619	0.779143
RNU6-110P	0.001929	0.50885	0.332001	0.779903
PDLIM7	0.00192969	1.96537	1.28223	3.01247
TAS2R18	0.0019316	0.507643	0.330698	0.779264
AP000344.4	0.00193557	0.50245	0.325167	0.776388
PLEKHA5	0.00193655	0.505221	0.328093	0.777977
TNNT3	0.00193927	1.98579	1.28685	3.06435
CTPS1	0.0019396	1.98099	1.2857	3.05229
C6orf47	0.00194357	1.96581	1.28196	3.01446
LEXM	0.00194926	1.97427	1.28383	3.03604
AC069294.1	0.00194949	0.506043	0.328874	0.778656
RELT	0.00196197	1.96671	1.28168	3.01788
AC091849.1	0.00197043	1.97423	1.28325	3.03729
LGALS8	0.00197292	1.97638	1.28369	3.04284
PKN2-AS1	0.00197574	0.508385	0.33118	0.780405
RPL39	0.00197642	0.507638	0.330382	0.779996
H2AFY2	0.00197658	1.978	1.28398	3.04714
CTD-2154I11.2	0.00197918	0.504502	0.327035	0.778272
B9D1	0.00198082	1.98361	1.2852	3.06155
RP4-718D20.3	0.00198163	0.508227	0.330972	0.780412
FGD2	0.00198271	1.97963	1.2842	3.05165
RP13-314C10.5	0.00198333	1.96875	1.2816	3.02432
RP11-383G10.3	0.00198761	0.507535	0.330195	0.780119
SNORD38	0.0019883	0.507264	0.329903	0.779978
MIR4304	0.00199007	0.505362	0.327872	0.778935
VAV1	0.00199207	1.9705	1.28178	3.02926
UNC93B6	0.00199233	1.97937	1.28388	3.0516
CRIP3	0.00199422	1.9702	1.28165	3.02865
RP11-514P8.2	0.0020086	0.507578	0.330098	0.780483
VCP	0.00200968	1.97105	1.28145	3.03175
RP11-597D13.7	0.00202858	1.97536	1.28197	3.04378
DPY19L1P2	0.00202992	0.501854	0.323891	0.7776
DPPA2	0.00203164	1.97962	1.2829	3.05472
MYB	0.00203304	0.5078	0.330168	0.780998
MIR4650-1	0.00203314	0.505576	0.327806	0.779751
RP11-266L9.5	0.00203797	0.507282	0.329584	0.780786
SEMA6D	0.00203887	0.504252	0.326365	0.779097
MTA2	0.00205132	1.95808	1.27728	3.00176
RP11-307P22.1	0.0020524	0.510625	0.333046	0.782886
RP11-571I18.5	0.00206053	0.510082	0.332413	0.782711
ZCCHC17	0.00206215	1.95818	1.27703	3.00265
ACA59	0.00206274	0.509135	0.331389	0.782216
RP11-428P16.2	0.00206613	1.96708	1.27903	3.02526
RP11-495P10.10	0.00206807	0.510025	0.332303	0.782798
AC105402.4	0.00208211	1.98183	1.2821	3.06345
FBXW4P1	0.00208509	0.509307	0.331424	0.782663
RAB17	0.00208918	1.96737	1.27851	3.02738
TNNI2	0.00210429	1.96374	1.27727	3.01917
TBX1	0.00211618	0.504424	0.326035	0.780417
TUBG2	0.00212126	1.95945	1.27583	3.00936
MIEF1	0.00212606	1.96006	1.27585	3.01118
SNX8	0.00212638	1.95637	1.27498	3.00192
RP11-346C16.2	0.0021271	0.509514	0.33137	0.78343
PPCDC	0.00213711	1.9698	1.27787	3.0364
RP11-390D11.1	0.00214243	0.509859	0.331637	0.783857
CAP1	0.00214363	1.95856	1.27506	3.00844
ZNF506	0.00214488	0.5105	0.332305	0.784251
ARPC1A	0.00214576	1.96087	1.27555	3.01439
RN7SL382P	0.00214608	0.50916	0.33087	0.783525
CTSV	0.0021487	1.97019	1.27767	3.03807
RP1-249F5.3	0.00215257	1.95713	1.2745	3.00537
ACOT9	0.00215468	1.95336	1.27357	2.99602
ELN	0.0021547	1.96755	1.2769	3.03177
TGFB1	0.00215824	1.96818	1.27696	3.03357
FAM196A	0.00216048	1.97664	1.27888	3.0551
RP11-35G9.5	0.00216671	0.512127	0.333901	0.785484
RP11-380G5.2	0.0021688	0.513677	0.335546	0.786373
EHBP1L1	0.0021757	1.95619	1.27371	3.00435
RP11-862P13.1	0.00218644	0.51183	0.333457	0.785617
FAM162A	0.00218812	1.96873	1.27635	3.03672
TRAV26-2	0.00219611	0.508816	0.330182	0.784094
UBA1	0.00221034	1.95373	1.27229	3.00014
RP11-168O16.1	0.00221396	1.95931	1.27351	3.01443
RP4-814D15.1	0.00221467	0.511845	0.333294	0.786048
PUSL1	0.00223052	1.94553	1.26989	2.98065
MBTPS1	0.00223468	0.500456	0.321089	0.780021
RP11-284F21.10	0.00223623	1.95965	1.27305	3.01654
FLVCR2	0.00224363	1.94786	1.27012	2.98725
CALCRL	0.00224714	1.979	1.27728	3.06623
CTC-250P20.1	0.00225058	0.512561	0.333834	0.786975
RNU6-60P	0.00225134	0.513376	0.334701	0.787434
RPS3AP26	0.00225421	0.513574	0.334894	0.787585
MIR5692A1	0.0022561	0.511021	0.332154	0.786208
RNU6-82P	0.00225622	0.513846	0.335173	0.787764
MED27	0.00225739	1.95158	1.27067	2.99737
MIS18BP1	0.0022694	0.514826	0.336141	0.788494
SPATA7	0.00228502	0.51182	0.332828	0.787072
RP11-147L13.8	0.00228947	0.51422	0.335368	0.788454
RP11-762H8.1	0.00229283	0.510851	0.331745	0.786653
ARPP21	0.00230072	0.510651	0.331484	0.786658
RAB3A	0.00230425	1.95373	1.27006	3.00541
PMM1	0.00230765	1.95273	1.26975	3.00308
FAM207A	0.00231268	1.94353	1.26749	2.98013
AC083884.8	0.0023141	0.511794	0.332622	0.78748
NUP93	0.00231419	1.96008	1.2713	3.02203
PPP2R5C	0.0023161	1.959	1.27101	3.01941
ZFHX4	0.00232722	0.512653	0.33346	0.788141
SERPINI1	0.00235447	1.94976	1.26798	2.99814
NEK2P4	0.00236018	0.513338	0.333992	0.788987
KCNQ1	0.00236853	1.94647	1.2669	2.99056
RP11-23N2.4	0.00237801	0.514841	0.335495	0.790059
VN2R10P	0.00238127	0.514086	0.334667	0.789694
LGALS14	0.0023892	1.93572	1.26394	2.96455
TAS2R64P	0.00239696	0.511593	0.331907	0.788555
SNAP29	0.00240813	1.94088	1.26471	2.97856
EIF2A	0.00241064	0.515057	0.335533	0.790635
TMEM38B	0.00241677	1.958	1.26846	3.0224
AIF1	0.00242215	1.95236	1.26704	3.00836
XXbac-BPG32J3.20	0.00242815	1.93006	1.26177	2.95231
RP11-507K2.6	0.0024302	0.512071	0.332221	0.789283
RP11-700J17.1	0.00243469	0.512512	0.332666	0.789587
AC132807.1	0.00243704	0.515904	0.336286	0.791462
PACS2	0.0024377	1.93223	1.26206	2.95828
LYN	0.0024381	1.95095	1.26636	3.00564
RP11-295K2.3	0.00244525	1.98237	1.27336	3.08616
LINC00238	0.00244689	0.512972	0.333086	0.790006
CTC-265F19.2	0.0024476	0.515712	0.336017	0.791504
GPR132	0.00245533	1.94888	1.2655	3.0013
CDC42EP3P1	0.00246046	0.516208	0.336474	0.79195
VIT	0.00246104	1.94224	1.26385	2.98477
NARF-IT1	0.00246289	0.51658	0.336859	0.792184
SLC9A3R1	0.00246299	1.95341	1.26637	3.01319
ANKHD1	0.00246449	0.517046	0.337351	0.792458
ARHGAP28	0.00246773	0.516027	0.336238	0.791952
RP11-15B17.4	0.00246808	0.517661	0.337992	0.79284
RARG	0.00246928	1.95557	1.26672	3.01901
RNU6-1169P	0.00246983	0.515112	0.335244	0.791485
CDK18	0.00247066	1.94592	1.26448	2.99459
PRELID1	0.00247551	1.94167	1.2634	2.98408
RP11-217O12.1	0.00248336	0.51753	0.337762	0.792978
NDUFA8	0.00248785	1.93316	1.26118	2.96318
UPF1	0.00249033	1.93987	1.26267	2.98028
RP11-1114A5.4	0.002492	0.515712	0.335759	0.792113
MPP7	0.00249372	1.94004	1.26263	2.98087
TMTC4	0.0024942	0.512745	0.332568	0.790536
MIR4285	0.00249699	0.513401	0.333254	0.790931
RP11-21J18.1	0.00250372	0.51618	0.336193	0.792526
AC139100.3	0.00250929	0.510923	0.330535	0.789755
RPL26P35	0.00251091	0.517244	0.337294	0.793197
AB015752.3	0.00252726	0.517818	0.337818	0.793727
LINC00235	0.00252836	0.516941	0.336869	0.793269
RP11-394O2.3	0.00253463	0.51353	0.333176	0.791514
CPNE7	0.00253539	1.93341	1.26022	2.96621
RNU6-198P	0.00253574	0.518428	0.338426	0.794169
RP11-396F22.1	0.00254143	1.92928	1.25914	2.95607
WNT9B	0.0025485	0.516148	0.335903	0.793113
AC124789.1	0.00254862	0.514949	0.334615	0.792469
RP5-940J5.6	0.00255617	0.516209	0.335925	0.793249
GARNL3	0.00255904	1.94146	1.26155	2.98782
RNU6-85P	0.00257488	0.51466	0.334157	0.792665
ZNF492	0.00257854	0.516277	0.335871	0.793585
EEF1A1P25	0.00258231	0.514657	0.334113	0.792763
HS3ST5	0.0025838	0.51845	0.338177	0.794821
TPTEP1	0.00258546	0.515018	0.334482	0.793
RP11-419I17.1	0.00258919	0.518192	0.337869	0.794754
PPM1M	0.00258997	1.93107	1.25853	2.96302
IGHD3-10	0.00259561	1.95776	1.26446	3.03121
TNS3	0.00260334	1.94297	1.26095	2.99388
AC007279.2	0.00260547	0.513223	0.332447	0.792299
SH2B3	0.00260652	1.93469	1.259	2.97301
RP11-522N14.2	0.0026075	0.512765	0.331946	0.79208
SLC6A16	0.00260814	1.94314	1.26089	2.99454
GPATCH11	0.0026135	1.93811	1.25963	2.98204
RP4-657E11.10	0.00261496	1.93497	1.25889	2.97413
SUPT16HP1	0.00262713	0.517843	0.337281	0.795066
BX649553.2	0.0026326	1.93457	1.25843	2.97399
AC005154.8	0.00264052	0.515695	0.334901	0.794092
B3GALT1	0.00264466	1.93927	1.25925	2.98652
RD3L	0.00264579	0.513522	0.332543	0.792995
AFF2-IT1	0.00265017	0.518559	0.337924	0.79575
MIR550A3	0.00265856	0.516622	0.335795	0.794824
MCM5	0.00265864	1.93087	1.25706	2.96587
RN7SL336P	0.0026635	0.518044	0.337297	0.795648
RNU2-69P	0.00266795	1.95159	1.26154	3.0191
EIF3LP3	0.00268021	0.520055	0.339372	0.796936
TFE3	0.00268467	1.93016	1.25636	2.96531
IL4I1	0.0027197	1.94356	1.25867	3.00115
RNF8	0.00272523	1.93597	1.25685	2.98205
SYN2	0.00272951	1.92992	1.2554	2.96684
MTND4P2	0.00273133	0.516768	0.335555	0.795842
RP11-192C21.1	0.00273427	0.51941	0.338382	0.797284
UGT3A2	0.00273938	0.517838	0.336662	0.796514
RP11-159F24.6	0.0027414	1.93783	1.25694	2.98756
RPL23AP61	0.00274473	0.518354	0.337188	0.796857
RPL17P25	0.00274623	0.520376	0.339359	0.797949
MKRN5P	0.00275985	0.51805	0.33678	0.796887
TMEM109	0.0027626	1.92306	1.2532	2.95099
RP11-624L4.2	0.00277253	1.94218	1.25728	3.00017
RP5-1092A11.2	0.00277686	0.51747	0.336066	0.796795
AC009120.6	0.00278528	0.521034	0.33986	0.798788
MTND4P9	0.00278907	1.92627	1.2534	2.96038
MON1A	0.0027931	1.92156	1.25226	2.94858
HSPA6	0.00279822	1.92105	1.25205	2.94753
SASH3	0.00280204	1.93186	1.25439	2.97523
RP11-17P16.2	0.00280279	0.519882	0.338524	0.798398
CES5AP1	0.002809	0.519526	0.338108	0.798288
GABRE	0.00281337	0.515601	0.333866	0.796263
MARS	0.00281383	1.91302	1.24994	2.92786
BTF3L4	0.0028176	0.520018	0.338592	0.798655
ARID3B	0.00281893	1.91681	1.25069	2.93772
AP003774.1	0.00283384	1.94596	1.2569	3.01277
ZNF138	0.00283457	0.518436	0.3368	0.79803
MYO1G	0.00283902	1.92565	1.25228	2.96112
RP11-524D16__A.3	0.00284251	1.91998	1.25094	2.94685
MIR562	0.00285079	0.521147	0.339637	0.799661
SNORD113-1	0.0028564	0.306178	0.140673	0.666402
RN7SKP243	0.00285839	0.521553	0.340036	0.799968
RP11-669E14.6	0.00286213	0.51952	0.337823	0.798944
TUBGCP2	0.0028642	1.91767	1.25001	2.94196
MIR551A	0.00286548	0.5163	0.334342	0.797285
RP11-45A17.4	0.00287427	0.519701	0.337954	0.799189
WHAMMP3	0.0028774	1.92438	1.25125	2.95961
AC026318.1	0.00288186	0.521784	0.340163	0.800377
RP11-398J5.1	0.00288529	0.470606	0.286642	0.772634
MDH1	0.00288937	1.91526	1.24899	2.93694
MIR181B1	0.00289158	0.521289	0.339578	0.800236
FAM133B	0.00289168	0.517334	0.335317	0.798155
AC005932.1	0.0028937	0.518683	0.336757	0.798891
SERPINI2	0.00289435	1.92243	1.25049	2.95542
COBL	0.00289969	1.93758	1.25375	2.99439
KCNE1B	0.00290218	1.92012	1.24983	2.94989
RP11-568N6.1	0.00290514	1.93406	1.25287	2.98563
LBHD1	0.00290709	1.91749	1.24915	2.94341
RPL32P26	0.00291382	0.520661	0.338785	0.800177
CYC1	0.00291715	1.91679	1.24881	2.94208
RP11-481G8.2	0.00292554	1.92434	1.25032	2.96169
SNAI2	0.00292695	0.520934	0.339012	0.800479
HOXA10-AS	0.00293243	1.91663	1.24848	2.94236
MRC1	0.0029434	1.91698	1.24835	2.94372
CTB-134F13.1	0.00294489	0.522262	0.340355	0.801391
FOXN3-AS1	0.00294663	1.92167	1.24933	2.95583
NAA16	0.00294964	0.522036	0.340087	0.801331
COX6CP10	0.002951	0.524078	0.34229	0.802414
RP11-780K2.1	0.00295112	0.523207	0.341346	0.80196
GPC3	0.00295587	1.91852	1.24846	2.94821
NAP1L4P1	0.00296535	0.519526	0.337298	0.800205
ASTN2-AS1	0.00297417	1.92287	1.24908	2.96012
LINC00539	0.00297567	0.520582	0.338384	0.800882
ACER3	0.00297707	1.91947	1.24827	2.95157
RP11-307C12.11	0.00298006	1.91385	1.24697	2.93736
LCN15	0.00298638	1.9168	1.24751	2.94516
RP11-956E11.1	0.00298741	0.521787	0.339625	0.801652
CA13	0.00298999	1.92983	1.25032	2.97863
MUTYH	0.00299182	1.91474	1.24695	2.94015
RP13-36G14.3	0.00300036	0.520161	0.337805	0.800957
ARHGAP30	0.0030007	1.9172	1.24733	2.94682
CAPZB	0.003001	1.90847	1.2454	2.92459
RUBCN	0.00300664	1.91327	1.24636	2.93705
MIR644A	0.00300798	0.522863	0.340686	0.802458
PCDH18	0.00302093	0.520967	0.338572	0.801623
RP11-640N20.5	0.00302429	0.523015	0.340768	0.80273
RGS19	0.00302865	1.90977	1.24518	2.92908
SEC23B	0.00303517	1.91048	1.24522	2.93117
METTL5	0.00304047	1.90902	1.2448	2.92766
RP11-271C24.3	0.00304694	0.520336	0.337761	0.801602
EXOSC4	0.0030472	1.90855	1.24457	2.92675
AL138706.1	0.00306053	0.519962	0.33729	0.801567
ARAP1	0.00306351	1.90864	1.2443	2.9277
Six3os1_1	0.00306468	0.396457	0.214905	0.731383
CSTF2	0.00306733	1.90731	1.24393	2.92446
TMEM185B	0.00308887	1.90228	1.24244	2.91256
RP11-927P21.6	0.0030959	1.92337	1.24694	2.96674
TRMT112	0.00309974	1.91157	1.24429	2.93671
RNU6-549P	0.00311718	0.52403	0.341408	0.80434
RP11-717D12.1	0.00311958	0.524662	0.342081	0.804695
MANSC1	0.00312156	1.91744	1.24518	2.95264
HHIP-AS1	0.00313068	0.520087	0.33708	0.802453
SLC2A5	0.00313227	1.90537	1.24235	2.92225
RP11-299A16.1	0.00313432	0.51173	0.3281	0.798132
LST1	0.00314252	1.91046	1.24328	2.93567
RP11-214O1.2	0.00314673	0.520815	0.337787	0.803016
CELSR2	0.00315633	1.90856	1.24262	2.93138
ETF1P2	0.00316197	0.521977	0.338968	0.803794
CTD-3088G3.6	0.00316637	0.520633	0.337495	0.803148
SEPT14P4	0.00317141	0.525135	0.342341	0.805531
ZSCAN12	0.00317365	0.522077	0.33902	0.80398
RPA2	0.00317582	1.9104	1.24268	2.93692
BRAF	0.00317905	0.520258	0.33703	0.8031
INTS3	0.00317924	1.90474	1.24138	2.92257
RGS14	0.00318202	1.90309	1.24097	2.91849
IL17D	0.00318345	0.525213	0.342368	0.805709
RTFDC1	0.00319104	1.90079	1.24031	2.91297
PRKRIR	0.00319915	1.92707	1.24589	2.98067
MIR125B1	0.00319995	0.332511	0.159906	0.691429
NCF4	0.00320281	1.90141	1.24024	2.91504
IGKV2-23	0.00320456	0.523466	0.340373	0.805049
WDPCP	0.00320516	0.526063	0.343186	0.806391
ACTN4P1	0.00320966	1.9092	1.24182	2.93525
RP11-94M14.2	0.00321256	2.00109	1.26147	3.17436
RP11-649A18.5	0.00323876	0.522105	0.338737	0.804734
ZSCAN5B	0.0032392	0.52497	0.341837	0.806213
RP11-445J14.1	0.00324758	0.527082	0.344091	0.807389
RP11-97N19.2	0.00325792	0.5225	0.339074	0.805154
PURG	0.00326172	0.523027	0.339626	0.805468
CTC-487M23.5	0.00329742	0.524484	0.341035	0.806614
FADS1	0.00330179	1.90465	1.23925	2.92735
FAM179B	0.00330193	0.521565	0.337856	0.805167
UCP2	0.00331846	1.90762	1.2396	2.93561
RP11-440L14.4	0.00332027	0.528207	0.344972	0.808767
LSP1	0.00332254	1.92125	1.24247	2.97085
RP11-384M15.3	0.00332949	0.524893	0.341328	0.807178
IL6R	0.00333839	1.90715	1.23916	2.93521
SREBF2	0.0033386	1.89793	1.23717	2.91161
CYP3A7	0.00335934	0.52549	0.341837	0.807811
ZNF672	0.00336029	1.90322	1.23795	2.926
FNIP1	0.0033728	0.524676	0.340892	0.807543
RP11-45A17.3	0.00337493	0.525332	0.341593	0.8079
RP11-245J9.5	0.00337744	0.528323	0.344834	0.809449
RNF126	0.00339251	1.89891	1.23648	2.91623
RP11-1036E20.7	0.00340589	1.90912	1.23846	2.94298
PBX3	0.0034075	1.89985	1.23644	2.91921
SNORA48	0.00342299	0.529258	0.345643	0.810414
C11orf63	0.00342384	1.89671	1.23549	2.9118
VN1R42P	0.00342877	0.527089	0.343255	0.809377
ZNF763	0.00343036	0.52662	0.342737	0.809156
ACO2	0.00343798	1.89065	1.23395	2.89683
NDUFS8	0.00344342	1.89128	1.234	2.89865
RP11-681H10.1	0.00344534	0.525113	0.341033	0.808553
PABPC1P3	0.00344898	0.526889	0.342946	0.809493
FTX	0.00345973	0.52809	0.344203	0.810216
SLC9C2	0.00346065	1.90948	1.23762	2.94607
CNOT2	0.00346075	0.528831	0.345006	0.810602
PPP6R1	0.00346131	1.8872	1.23283	2.8889
CTC-244M17.1	0.00346572	0.528748	0.344893	0.810613
AC016821.1	0.00347724	1.90472	1.23633	2.93445
TUBA1C	0.00347732	1.90382	1.23614	2.93214
LINC00880	0.00348443	1.8984	1.23486	2.91847
MOAP1	0.00348538	1.88474	1.23192	2.8835
TRPM6	0.00348584	0.520719	0.336098	0.806754
RP11-793A3.2	0.00349045	1.91874	1.2391	2.97114
VN1R93P	0.00349486	0.528551	0.344547	0.810822
RP11-654A16.3	0.00349631	0.524046	0.339646	0.808558
SUZ12P1	0.00350007	0.527776	0.34368	0.810487
AL157882.1	0.00350457	0.528298	0.344227	0.810797
TEX261	0.00352345	1.89342	1.23317	2.90717
IGHD2-15	0.00352374	1.92126	1.23909	2.97899
SLC25A20	0.00352735	1.9062	1.23583	2.94021
RP11-775C24.4	0.00352833	0.523595	0.339015	0.808671
CDK12	0.0035311	0.526342	0.341981	0.810091
RP11-26F2.2	0.00354062	1.90256	1.23484	2.93134
CTD-2560C21.1	0.00354503	0.527366	0.343032	0.810754
PCDH17	0.00354601	0.525726	0.341246	0.809937
PRR4	0.00354991	0.528678	0.344439	0.811466
RP11-250B2.5	0.00355384	0.527172	0.342782	0.810749
TLN1	0.00355649	1.89135	1.2322	2.90312
PDE8A	0.00356386	0.527541	0.343139	0.81104
RP11-73M11.3	0.00357536	0.524903	0.340223	0.809831
SNORD117	0.00357728	0.529862	0.345608	0.812347
HNRNPRP1	0.00357873	0.529402	0.3451	0.812131
ZNF117	0.003579	0.526607	0.342056	0.810729
GSG1	0.00358065	0.530128	0.345884	0.812516
ABHD15	0.0035835	1.89657	1.23288	2.91755
IGF2R	0.00358537	1.89021	1.2315	2.90125
FAM217A	0.00358795	0.520862	0.335797	0.807919
MIR100HG	0.00359285	0.528995	0.344594	0.812074
CLIP4	0.00359993	1.90603	1.23463	2.94256
RP11-508N22.12	0.00360391	0.526584	0.341921	0.810978
RP11-430B1.1	0.00362555	0.529574	0.345081	0.812703
AK9	0.0036281	0.530332	0.345898	0.813108
FRYL	0.0036483	0.529365	0.344754	0.812832
CCDC150P1	0.00366092	0.531467	0.346994	0.814011
HSPD1P8	0.00369063	0.529713	0.34495	0.81344
TIMM8B	0.00369233	1.88624	1.22899	2.89499
AC073648.1	0.00369504	0.506394	0.319874	0.801673
AC093732.1	0.00369543	0.529312	0.344491	0.813288
ATP6V0E2-AS1	0.00369802	1.88723	1.22911	2.89774
RP11-478C19.2	0.0037011	0.529923	0.345134	0.813651
RN7SL517P	0.00370307	0.531427	0.346767	0.81442
AC010886.2	0.00371154	1.89334	1.23019	2.91396
RP1-170O19.23	0.0037211	1.88785	1.22889	2.90018
DENND1B	0.00373017	0.530422	0.345553	0.814194
SCAMP2	0.0037305	1.90129	1.23157	2.9352
RP3-497J21.1	0.0037328	0.532037	0.347307	0.815024
RP11-405O10.2	0.00373772	0.531302	0.346482	0.814708
RP3-325F22.5	0.00374157	1.88857	1.22873	2.90277
CHCHD2P11	0.00374283	1.89329	1.2297	2.91499
HES3	0.00376246	0.524738	0.339233	0.811686
AC002456.2	0.00376919	0.530079	0.345012	0.814417
TBC1D12	0.00377672	1.88413	1.22726	2.89259
DNAJB2	0.00379334	1.87472	1.22502	2.86897
MXRA5	0.00381501	0.530084	0.344823	0.814878
LURAP1L	0.00382968	0.531941	0.34679	0.815943
CD109	0.00383083	1.88489	1.2266	2.89647
AC096664.2	0.00383308	0.531958	0.346795	0.815986
EMC3	0.00383744	1.87669	1.22478	2.87558
UNC93B1	0.00384031	1.88672	1.22685	2.90151
DNAJC10	0.00384087	1.88434	1.22634	2.89539
BRDTP1	0.00384807	0.509503	0.322524	0.804882
TRAPPC3	0.00385485	1.87273	1.2237	2.86602
RP11-463J10.2	0.00385497	0.530556	0.345171	0.815509
ADAM29	0.00385874	0.530598	0.345201	0.815567
RP11-304L19.1	0.00386974	0.52849	0.342856	0.814632
CTD-2529O21.1	0.00388507	0.533148	0.34788	0.817084
HEXIM1	0.00388733	1.89087	1.22701	2.91389
CPA2	0.00389883	0.532963	0.347619	0.817127
SOCS1	0.00390849	1.87194	1.22274	2.86581
MIR210	0.00391112	1.88057	1.22451	2.88813
KXD1	0.00391341	1.88016	1.22439	2.88715
CLINT1	0.0039234	0.528525	0.342671	0.815179
ARHGEF15	0.00392416	0.528154	0.342264	0.815004
B4GALT1-AS1	0.00392837	1.87389	1.22286	2.8715
SLC5A5	0.00392994	1.88312	1.22477	2.89536
S100A6	0.00393328	1.87515	1.22306	2.87491
TRAV32	0.00393497	0.530702	0.344998	0.816367
AC105052.2	0.00394519	0.532657	0.347093	0.817428
RP11-132G19.3	0.00394859	0.532734	0.347163	0.817499
RNU6-681P	0.0039494	0.533626	0.348136	0.817944
RP5-837J1.4	0.003956	0.533632	0.348117	0.818011
C6orf106	0.00396623	1.87778	1.22313	2.88282
RN7SL434P	0.00397141	0.533365	0.347761	0.818029
MFSD2B	0.00397265	0.530929	0.345091	0.816845
RP11-457D2.3	0.00397455	1.87241	1.22189	2.86925
CDC42-IT1	0.00398232	0.533422	0.347778	0.818162
GDPD4	0.0039903	1.87416	1.22203	2.87431
BLOC1S3	0.0039914	1.87963	1.22315	2.88846
HOMEZ	0.00399306	1.88479	1.2242	2.90185
RP11-132A1.4	0.00399408	1.87014	1.22114	2.86407
SLCO4A1	0.00400364	1.87745	1.22252	2.88324
UBBP1	0.00400522	1.87376	1.22173	2.87378
IGF2BP3	0.00401009	1.88774	1.22456	2.91007
PRR15	0.00401055	0.530163	0.344099	0.816835
AK4	0.00401421	0.531498	0.345543	0.817526
TBX2-AS1	0.00402321	0.535717	0.35013	0.819675
TNFSF15	0.00402908	1.88175	1.22305	2.89522
NAALADL2	0.00403274	0.533075	0.347192	0.818476
ARHGAP6	0.00404811	1.87868	1.22214	2.88791
KB-1732A1.1	0.00405053	1.87644	1.22164	2.88222
RPL21P8	0.0040511	0.534126	0.34827	0.819164
AC114730.2	0.00405429	1.87312	1.2209	2.87376
EAF1	0.0040601	1.88993	1.22429	2.91749
EXTL3	0.00406322	1.8757	1.22131	2.88072
RP13-20L14.6	0.00406753	1.87389	1.22087	2.87619
TMEM212-AS1	0.00406959	0.484402	0.295415	0.794292
CTC-529I10.1	0.0040752	0.531809	0.345636	0.818262
RP11-599B13.7	0.00408982	1.87518	1.22082	2.88028
WAS	0.00409417	1.87272	1.22025	2.87407
HSD17B10	0.00410273	1.86901	1.21937	2.86476
IGHV3-36	0.00411135	0.532822	0.346599	0.819099
AC010642.1	0.00411245	0.532077	0.34578	0.818746
CPT2	0.00411459	1.8678	1.21895	2.86203
TMEM144	0.00412168	1.87846	1.22105	2.88981
RP11-481J2.4	0.00413465	0.533758	0.347532	0.819774
FAM118B	0.00414327	1.87727	1.2205	2.88746
RP11-1263C18.1	0.00414606	0.341875	0.164129	0.712111
TMEM121	0.00414689	1.87259	1.21949	2.87547
MKNK2	0.00414809	1.86879	1.21869	2.86567
FLT3	0.00414859	1.8733	1.21961	2.87735
MINK1	0.00415487	1.87027	1.2189	2.86974
LACE1	0.00416025	0.535636	0.349491	0.820924
LINC01473	0.00416752	0.534495	0.348209	0.820439
AKR1B1	0.00416913	1.87506	1.21969	2.88259
PLXNC1	0.0041742	1.8972	1.22415	2.94032
LCT	0.00417912	1.86747	1.21799	2.86329
ITGAL	0.00421222	1.88183	1.22048	2.90155
ACSS1	0.00421754	1.87604	1.21922	2.88671
RP11-932O9.8	0.0042183	0.535147	0.348725	0.821226
MFSD8	0.00421912	0.534996	0.348556	0.82116
CCDC69	0.00422474	1.87305	1.21851	2.8792
HNRNPCP6	0.00423839	0.531356	0.344494	0.819576
ASTN2	0.00424675	1.87631	1.21887	2.88837
SERTAD4	0.0042631	0.534191	0.347502	0.821177
DUBR	0.00427353	1.87559	1.21836	2.88736
RP11-193I22.2	0.00427411	0.537246	0.350815	0.82275
RP11-840I19.3	0.00427596	0.534186	0.347446	0.821293
RHOF	0.00427866	1.86282	1.21568	2.85446
IKBKG	0.00429893	1.87026	1.21692	2.87435
RNY1P11	0.00431515	0.536385	0.349709	0.822709
PHLDB3	0.00432563	1.87374	1.21727	2.88423
AL136115.1	0.00432748	0.536775	0.350091	0.823009
SIPA1	0.00433206	1.86712	1.21584	2.86727
RP11-128P10.1	0.00433642	0.537014	0.350319	0.823204
CORO2B	0.00433933	0.535109	0.348214	0.822316
LPAR4	0.00434161	0.535864	0.349034	0.822699
TBC1D32	0.00436157	0.534888	0.347886	0.822411
CRACR2B	0.00436617	0.535832	0.348905	0.822906
LINC01580	0.00437225	1.84692	1.21118	2.81635
ABI3	0.00437471	1.87754	1.21738	2.89569
BNIP3P40	0.00438165	0.537117	0.350259	0.823661
DNMT3A	0.00438307	0.534031	0.346863	0.822194
MFSD5	0.00438378	1.86128	1.21396	2.85377
SAMSN1-AS1	0.00438767	0.53409	0.346911	0.822264
CTB-61M7.1	0.00439496	1.86745	1.21506	2.8701
RP11-637N19.1	0.00439725	1.87539	1.21664	2.89082
WDR1	0.00440055	1.85943	1.21336	2.8495
RP11-639F1.2	0.00440138	0.50966	0.320497	0.810469
MCOLN1	0.00440932	1.86327	1.21403	2.85971
LIFR	0.00441672	0.532556	0.34512	0.821788
RP4-635E18.6	0.00442022	1.86475	1.21418	2.86388
FXNP2	0.00442188	0.538275	0.351381	0.824573
CTC-268N12.3	0.0044241	0.539401	0.352616	0.82513
AC005020.1	0.00443479	0.535545	0.348329	0.823385
RP11-69L16.4	0.00443692	0.537655	0.350642	0.824412
KIAA0125	0.00444592	1.88391	1.21771	2.91458
MVP	0.00444887	1.86164	1.21318	2.85672
ZSCAN23	0.00445336	0.533583	0.346107	0.822611
AC006116.13	0.00445672	0.539221	0.352293	0.825333
CDCP1	0.00446476	1.8665	1.21395	2.86981
SNORA54	0.00446605	0.536162	0.348888	0.823958
ADSSL1	0.00446657	1.86805	1.21424	2.8739
IL15	0.00446788	1.86634	1.21388	2.86949
PPP2R5B	0.00446879	1.85572	1.21172	2.84199
ZDHHC14	0.00447544	0.534725	0.347275	0.823355
RNA5SP53	0.00447558	0.536662	0.349403	0.824281
SIX3-AS1	0.00447631	0.517673	0.328768	0.815119
TSPAN10	0.00448	0.536918	0.349668	0.824442
GPX4	0.00448576	1.86142	1.21265	2.85727
LINC01270	0.00448915	1.86073	1.21247	2.8556
DOK2	0.00448955	1.86206	1.21273	2.85906
ITM2A	0.00449	0.535073	0.347603	0.823651
HOXA10	0.00449116	1.87144	1.2146	2.88349
MAP2K4P1	0.00449697	1.8685	1.21394	2.87603
RP11-214O1.3	0.00449857	0.531525	0.343685	0.822029
TMEM212-IT1	0.00449943	0.424648	0.235179	0.766762
RP11-620J15.3	0.00450827	0.537158	0.349826	0.824806
TG	0.00451125	1.87138	1.21433	2.88394
XRCC6	0.00451168	1.86353	1.21274	2.86355
RP11-70J12.1	0.00451559	0.523241	0.334618	0.81819
RP11-147L13.12	0.00451588	0.538403	0.35117	0.825465
NUDT14	0.00452736	1.86396	1.21262	2.86514
IFI27L2	0.00453281	1.85804	1.21136	2.84995
AC124914.3	0.00453416	0.536596	0.349112	0.824767
ANKEF1	0.00453928	1.86085	1.21184	2.85744
KLF9	0.00453984	1.8554	1.21074	2.84333
PTCHD3P3	0.00454262	1.86212	1.21206	2.86083
RP11-394B2.6	0.00454445	0.538366	0.351021	0.825698
RNY4P6	0.00454765	0.539115	0.351837	0.826081
RP11-64D24.2	0.00455091	0.538572	0.351225	0.825852
PNMA1	0.00455515	1.85426	1.21031	2.84082
CHD6	0.00456314	0.534914	0.347156	0.824221
AP001437.1	0.00456736	1.8594	1.21119	2.85452
MR1	0.00457418	1.87386	1.21401	2.89237
AC006116.22	0.00457552	0.538621	0.351188	0.826089
RP11-74D7.1	0.00457578	0.537798	0.35028	0.825702
RNU6ATAC39P	0.00457855	1.85941	1.21105	2.85488
SEPT7P6	0.00460036	0.539451	0.352012	0.826698
MRPL44	0.00460365	1.85775	1.2104	2.85133
PANK2	0.00460699	1.8591	1.21063	2.85493
ISPD-AS1	0.00460989	0.53927	0.351777	0.826694
PRSS42	0.00461588	0.539321	0.351812	0.826771
RP11-384L8.1	0.00461906	0.536649	0.348855	0.825534
PPP1R9A	0.00461937	1.85939	1.21053	2.85606
ANKMY2	0.00462096	0.534387	0.346364	0.824477
GLIPR2	0.00462504	1.85112	1.20879	2.83476
FEM1C	0.00464392	0.537185	0.349355	0.826003
POM121L14P	0.00464432	0.538058	0.350314	0.826419
SYK	0.00464664	1.86151	1.21061	2.8624
ATP13A1	0.00464748	1.85264	1.20882	2.83936
OXCT1	0.00464806	1.85529	1.20934	2.84626
MIR573	0.00465287	0.539487	0.351859	0.827167
NME5	0.00466307	0.531135	0.342652	0.823298
GALM	0.00466317	1.85867	1.20983	2.85548
CT45A3	0.00468287	1.99021	1.23524	3.20661
RP11-616M17.1	0.00468861	0.539945	0.352234	0.827689
AC008536.1	0.0046929	0.540785	0.353147	0.828121
SNRPG	0.00470439	1.85608	1.20879	2.84997
ZNF638-IT1	0.00472323	0.540625	0.352861	0.828303
RPL23AP92	0.00473418	0.538187	0.35013	0.827251
FNDC3A	0.00475089	0.537943	0.349801	0.827278
AC006116.15	0.00475764	0.538817	0.35074	0.827746
RP11-159H10.4	0.00476818	0.541352	0.353502	0.829024
RP11-378A13.1	0.00476829	1.8527	1.20733	2.84306
GABRD	0.00478019	0.538032	0.349794	0.827569
DCHS2	0.00478586	0.538479	0.350266	0.827827
ST3GAL6	0.00478605	0.540811	0.35284	0.828921
SNORD67	0.00479129	0.539734	0.351631	0.828461
COX7B	0.00479803	1.85248	1.20692	2.84335
PTPRN2	0.00480649	1.86981	1.21025	2.88883
SF3B2	0.00480796	1.85487	1.20727	2.84985
BICC1	0.0048165	0.538579	0.350267	0.828132
WASF2	0.00481721	1.85416	1.20702	2.84827
LAMTOR2	0.00482107	1.84855	1.20586	2.8338
IGLV2-34	0.00482228	0.538359	0.350004	0.828078
RP4-551N11.1	0.00483169	0.539193	0.35089	0.828547
PPM1G	0.00484087	1.84979	1.20586	2.83758
TVP23CP1	0.00484104	0.538329	0.349904	0.828222
MTF2	0.00484273	0.541649	0.353565	0.829787
GJA1	0.00484366	0.542546	0.354555	0.830212
AP000857.2	0.00484659	0.530746	0.341567	0.824701
USP39	0.00485084	1.84477	1.20474	2.82482
IL1R2	0.0048569	1.84541	1.2048	2.82666
RP11-1023L17.2	0.0048581	0.540143	0.351845	0.829212
RP11-17G12.3	0.00485933	0.543248	0.355278	0.830669
GPR55	0.00486964	1.85078	1.20571	2.84097
ALKBH5	0.00487051	1.84705	1.20496	2.83129
RP11-268I9.1	0.00487141	0.539288	0.350854	0.828924
CTD-2213F21.3	0.00487587	0.538835	0.350339	0.82875
RP11-248J18.3	0.00489521	0.538456	0.349853	0.828734
CTD-2620I22.3	0.00489857	1.85054	1.20531	2.84118
BATF2	0.00490353	1.84608	1.20437	2.82972
MTRNR2L4	0.00490709	0.541431	0.353096	0.830219
ZNF439	0.00490719	0.540757	0.352351	0.829907
CTB-193M12.3	0.00491392	0.539982	0.351471	0.829602
RP11-613D13.5	0.00493374	0.540551	0.352029	0.83003
SPAG1	0.00493899	1.85201	1.20512	2.84615
RP11-596D21.1	0.00495101	0.538098	0.349263	0.829031
LINC00379	0.00495138	1.8432	1.20323	2.82356
MIR744	0.00496538	0.540058	0.351374	0.830062
SNHG3	0.00496869	1.8443	1.20324	2.8269
TULP2	0.00496879	0.538935	0.350123	0.829568
IFT88	0.00496962	0.538612	0.349764	0.829425
RP1-136B1.1	0.00498339	0.543477	0.355097	0.831794
FAM124B	0.00498831	1.85151	1.20443	2.84624
NKTR	0.00498859	0.538597	0.349681	0.829574
RP11-7F18.2	0.00500127	0.538545	0.34958	0.829654
EFHD2	0.00500292	1.84554	1.20308	2.83109
BATF3	0.00500354	1.85355	1.20465	2.85199
AP2M1	0.0050089	1.84331	1.20257	2.82544
C8orf4	0.00500972	0.541349	0.352648	0.831025
ENO1	0.00501021	1.84394	1.20268	2.82712
RPS3P7	0.00501988	0.542535	0.353926	0.831656
ZNF461	0.00502198	0.542779	0.354189	0.831786
GSPT2	0.00502204	1.84839	1.20341	2.83904
EIF2AK4	0.00502238	1.8451	1.20277	2.83049
RP11-345I18.4	0.00502836	0.543454	0.354916	0.832149
CCDC66	0.00503223	0.544528	0.356094	0.832675
RP11-849I19.2	0.00504016	0.540947	0.352098	0.831087
CTA-313A17.5	0.00504115	0.542462	0.353772	0.831795
RP11-535A19.2	0.00504619	1.84249	1.20197	2.82434
ERI3-IT1	0.00504888	0.541353	0.352517	0.831345
IRAK1	0.00506493	1.83932	1.20113	2.8166
AC068587.2	0.00506975	0.544203	0.355603	0.832828
MLF1	0.0050913	1.84877	1.20268	2.84197
PAQR8	0.00509923	1.84199	1.20126	2.82449
TMEM173	0.00509944	1.84177	1.20121	2.82392
LINC00624	0.0051003	0.541065	0.352021	0.831628
RNPEP	0.00510397	1.84468	1.20173	2.83162
SLC22A18AS	0.00511295	1.85113	1.20288	2.84872
IGHD6-13	0.00512287	1.85349	1.20323	2.85517
BLOC1S2	0.00512718	1.84223	1.20098	2.82587
RP11-283G6.4	0.00513737	0.54366	0.354769	0.83312
SUGT1P2	0.00513967	0.544517	0.355713	0.833532
AC079781.1	0.0051416	0.543795	0.354905	0.833216
RP11-495P10.1	0.00514255	0.544492	0.355676	0.833544
TMEM165	0.00514536	0.542468	0.353422	0.832637
RFX5	0.00514802	1.84216	1.20073	2.82626
AC104650.1	0.00515988	1.84241	1.20064	2.82722
GHR	0.00516172	0.542042	0.352894	0.832572
B3GAT3P1	0.00517419	1.83792	1.1996	2.81591
RP11-303E16.6	0.00521613	0.540009	0.350462	0.832073
ADAM12	0.00522833	0.541715	0.352307	0.832953
PDLIM1P4	0.0052295	0.542166	0.352803	0.833169
SHD	0.00526304	0.542745	0.353332	0.833699
IGHD3-9	0.00526425	1.85825	1.2025	2.87158
MESTIT1	0.00526847	0.54383	0.354516	0.834237
RP1-163G9.2	0.00527327	1.83204	1.19733	2.8032
C2orf66	0.00527917	1.85565	1.20183	2.86516
MPG	0.00528739	1.83836	1.1984	2.82007
PDGFRA	0.00529556	0.537858	0.347824	0.831717
SUMO3	0.00530484	1.83889	1.19831	2.82192
KB-1205A7.2	0.00531487	0.543997	0.354547	0.834677
CTD-2329K10.1	0.00531936	0.544969	0.355612	0.835155
LINC00552	0.00532371	0.539597	0.349648	0.832737
RP11-1180F24.1	0.0053401	1.83935	1.198	2.82405
FEN1	0.0053476	1.83882	1.19781	2.82285
CTB-171A8.1	0.00534824	1.83516	1.1971	2.81331
TRBV6-8	0.00535473	0.54477	0.355274	0.835339
RP11-567O16.1	0.00535474	0.544502	0.354976	0.835218
FCF1P8	0.00535704	0.544593	0.35507	0.835277
EHD1	0.00536347	1.83557	1.19701	2.81479
LINC01475	0.00536605	1.84274	1.19836	2.83362
AC009948.5	0.00539856	0.54461	0.354952	0.835606
GALNT1	0.00541592	0.545276	0.355635	0.836042
TMPRSS11D	0.00541811	0.546537	0.357032	0.836629
COL2A1	0.00542168	0.538871	0.348524	0.833175
CTC-487M23.6	0.00542172	0.543134	0.353238	0.835116
USP27X	0.00545377	1.83306	1.19553	2.81056
AC011816.1	0.00545404	0.546043	0.356364	0.836682
RP11-773H22.4	0.00546473	0.546334	0.356652	0.836894
DOLK	0.0054649	1.82944	1.19471	2.8014
NBR2	0.00546798	0.541645	0.351438	0.834798
ZNF559	0.00546897	0.542318	0.352179	0.835111
RNU6-107P	0.00547162	0.544512	0.354604	0.836124
AC007255.8	0.00547701	0.545533	0.355721	0.836627
GPD1L	0.00547948	1.84194	1.19695	2.83448
AC007279.1	0.00548037	0.544676	0.354759	0.836266
MIR25	0.00548286	0.540861	0.350522	0.834557
SH3GL1P2	0.00548643	0.543229	0.353132	0.835658
TUBGCP3	0.00548805	0.546085	0.3563	0.83696
RHBDF2	0.00549975	1.83738	1.19585	2.82305
CASC2	0.00550903	0.543512	0.353373	0.835959
HCG4P7	0.00551463	1.84518	1.19718	2.84393
C6orf89	0.0055156	1.83922	1.19603	2.8283
RP11-1174L13.2	0.00552137	0.54711	0.357333	0.837675
SCNM1	0.00552396	1.82752	1.1937	2.79789
SMARCAD1	0.00553287	0.54509	0.355049	0.836853
STK11	0.00553456	1.83719	1.19544	2.82345
RNY4P17	0.00553568	0.544546	0.354434	0.836629
MYBL2	0.0055423	1.83471	1.19488	2.81714
RP5-850O15.3	0.0055502	0.546417	0.356468	0.837581
ARHGEF38	0.00555662	0.545765	0.355722	0.837337
NSMCE1	0.0055686	1.83149	1.19398	2.80938
SYCP3	0.00557292	0.546295	0.356259	0.837698
COX5B	0.00557933	1.83575	1.19468	2.82083
MTND3P5	0.0055879	1.83842	1.19509	2.82805
SYP	0.00560557	1.82976	1.19325	2.8058
PRR34-AS1	0.00561686	1.83628	1.19437	2.82317
HDAC1	0.00562027	1.82429	1.19205	2.79186
HOXA9	0.0056243	1.83179	1.19344	2.81158
C8orf46	0.00562763	1.84878	1.19663	2.85635
POLR3GL	0.00563754	1.82632	1.19226	2.7976
MGST1	0.00565535	0.54384	0.353268	0.837217
NHLRC1	0.00566044	1.83079	1.19286	2.80986
SMIM24	0.00566109	0.545508	0.355103	0.838008
SMYD3-IT1	0.00566534	0.545107	0.354644	0.837861
HNRNPA3	0.00566581	0.546306	0.355976	0.838401
TRBV8-2	0.00566614	0.536744	0.345396	0.834098
TEP1	0.00567607	1.8295	1.19245	2.80688
INSR	0.00567814	0.542941	0.352198	0.836984
COX6A1P2	0.0056924	1.83061	1.19249	2.81021
MIR181D	0.0056959	0.545423	0.354898	0.83823
RP11-173P15.9	0.00569971	0.547778	0.357508	0.83931
ANGEL1	0.00570094	1.83669	1.19355	2.82639
SPIN2A	0.00570317	0.545152	0.354574	0.838163
MRPS21	0.00570606	1.82175	1.19066	2.78732
ZNF627	0.00571053	0.546907	0.356504	0.839002
SRXN1	0.00572521	1.82809	1.19167	2.8044
RP11-797H7.1	0.00572552	0.54524	0.354602	0.838369
HCP5	0.00572621	1.82928	1.19188	2.80754
AP000282.3	0.00575144	0.547482	0.357015	0.839561
RP5-1136G13.2	0.00575482	0.545808	0.355141	0.83884
RP11-843A23.1	0.00575652	0.548899	0.358581	0.840229
LCMT1-AS1	0.00575986	0.54665	0.356062	0.839253
A2ML1	0.00576528	1.85229	1.1958	2.86919
AC006116.20	0.00577158	0.547642	0.357131	0.839781
RP11-649E7.7	0.00578898	0.547698	0.357139	0.839934
RP11-95I19.2	0.00579363	0.546877	0.356209	0.839603
C1orf131	0.0057985	1.8331	1.19184	2.81938
HNRNPA1P62	0.0058204	0.548284	0.357695	0.840424
CTD-2523D13.1	0.00583515	0.548022	0.357356	0.840416
RNU6-431P	0.00583839	0.546478	0.355626	0.839754
RP11-147L13.14	0.00584466	0.54905	0.358475	0.840941
SUPT4H1P1	0.00584743	1.82293	1.18942	2.79387
TMEM87A	0.00585559	0.544247	0.353092	0.838889
GFPT1	0.00586512	0.542531	0.35116	0.838195
STX12	0.00587061	1.82934	1.19039	2.81127
TPRG1-AS1	0.00588548	1.82769	1.18992	2.80729
CDH11	0.0058863	0.547651	0.356784	0.840624
FNBP1L	0.00588931	0.544547	0.35332	0.839269
RP11-61G19.1	0.00588971	1.82237	1.18888	2.79343
RP11-739P1.2	0.00589277	0.546025	0.354953	0.839951
UPK3A	0.00589984	1.83117	1.19043	2.8168
RNU6-789P	0.00590311	0.545178	0.35398	0.839651
ACBD4	0.00590495	1.83162	1.19046	2.8181
NAA10	0.00591129	1.83432	1.1909	2.82538
MISP	0.00591822	0.54806	0.357143	0.841037
EEF1A1P11	0.00593685	0.549063	0.358205	0.841614
RP11-690P14.4	0.00594954	0.548348	0.357368	0.84139
RP11-798M19.3	0.00597041	0.548599	0.357584	0.841651
AC079922.3	0.0059747	1.81381	1.18641	2.773
STXBP5	0.00598016	0.549373	0.358419	0.842062
CC2D1A	0.00598806	1.81738	1.18694	2.78266
HN1L	0.00600833	1.83255	1.18957	2.82306
MKLN1	0.00601148	0.549332	0.358278	0.842268
RP11-802O23.3	0.00601592	0.547411	0.35612	0.841455
CCNG2	0.00604185	0.550916	0.359957	0.843179
AC025918.1	0.00604259	0.549446	0.358311	0.84254
DANT2	0.00605389	1.81975	1.18672	2.79044
STMND1	0.00606968	0.550177	0.359046	0.843053
COX7A2	0.00607506	1.81624	1.18586	2.78172
RP11-2C24.7	0.00607545	0.547153	0.355652	0.841768
PWWP2A	0.00607769	0.547418	0.35594	0.8419
NHLRC3	0.00609118	0.550581	0.359433	0.843382
CBX2	0.00609854	0.547291	0.355737	0.841993
PYCR2	0.00610454	1.81789	1.18587	2.78673
RP11-299P2.1	0.00610493	0.551298	0.360195	0.843792
MOCOS	0.00610661	1.82771	1.18767	2.81265
GNAZ	0.00611369	1.82735	1.18754	2.81189
RNU7-71P	0.00611831	0.551016	0.359838	0.843763
EIF5A2P1	0.00612796	0.549669	0.358303	0.843243
IL1RAP	0.00616353	1.81866	1.18543	2.79016
PPP2R4	0.0061646	1.81739	1.18518	2.78683
RP11-162G10.1	0.00616484	0.551012	0.359694	0.844089
PLAGL1	0.00618336	0.547969	0.356239	0.842891
HMGN1P4	0.00618571	0.54899	0.357371	0.843354
INPP1	0.00619473	1.81934	1.18525	2.79266
VN1R83P	0.00621059	0.549896	0.35831	0.843923
AQP11	0.00622013	0.549669	0.358027	0.843891
TDRD9	0.00623578	0.546477	0.35442	0.842608
RP11-60A14.1	0.00623853	1.82401	1.18568	2.80599
RP5-1112D6.8	0.00625119	0.550792	0.359191	0.844596
RN7SL535P	0.00625252	0.547663	0.355692	0.843244
ASB2	0.00625456	1.8232	1.18537	2.80422
SRP72P2	0.0062633	0.552331	0.360881	0.845348
PIBF1	0.00626758	0.551309	0.359722	0.844934
RNU6-514P	0.00626793	0.552518	0.361077	0.845461
C15orf48	0.0062712	1.82072	1.18475	2.79806
RP11-36I17.2	0.00629783	0.550037	0.35821	0.844592
ISM1-AS1	0.00631545	0.550277	0.358426	0.844818
FAHD1	0.00632186	1.81112	1.18249	2.77393
RBM38	0.00632547	1.81006	1.18226	2.77122
ZNF564	0.00632619	0.552798	0.361219	0.845983
ITGA7	0.00632705	1.81742	1.1836	2.79064
TSPAN14	0.00633847	1.81692	1.1834	2.7896
MTTP	0.00634165	0.553143	0.361562	0.846238
KHDC1	0.00634219	1.8185	1.18365	2.79385
RNU6-312P	0.00634919	0.54899	0.356889	0.844494
TP53BP2	0.00635397	0.541806	0.348888	0.841398
CCDC102A	0.00636729	1.822	1.18405	2.80367
USP30-AS1	0.00637557	1.82884	1.18522	2.82197
ARHGAP5	0.00637843	0.551817	0.359966	0.845918
RP11-128N14.5	0.00638574	0.551474	0.359561	0.84582
SAMM50	0.00639564	1.82153	1.18369	2.80308
MIR617	0.00639777	0.49638	0.300028	0.821234
RP11-1250I15.1	0.00641711	0.552978	0.361157	0.846682
RP11-284F21.9	0.00642489	1.81218	1.1817	2.77903
USP27X-AS1	0.00642509	1.81823	1.18281	2.795
PRDM16	0.0064296	1.81606	1.18237	2.78939
ZNF548	0.00643553	0.549532	0.357242	0.845323
CYCS	0.00644439	1.81261	1.18159	2.7806
HELZ2	0.00646709	1.81139	1.18116	2.77791
RRNAD1	0.00646763	1.81982	1.18269	2.80018
TXNDC12	0.00646901	1.81129	1.18112	2.77767
RP11-147L13.7	0.00647315	0.552699	0.360681	0.846943
GRTP1	0.00647321	0.546704	0.353979	0.84436
NDUFA12	0.00647704	1.81123	1.18103	2.77771
RP11-550F7.1	0.00647778	1.81468	1.18166	2.78683
AC073089.1	0.00647873	0.552952	0.360949	0.847089
TMEM200A	0.00648158	1.81587	1.18184	2.79004
AC108479.2	0.00650538	1.81429	1.18132	2.78641
SLC25A51	0.00650962	1.81049	1.18059	2.77646
MYCBP	0.00652079	1.81492	1.18129	2.78842
LINC01503	0.00653559	1.81845	1.18179	2.79808
RP11-266L9.3	0.00654021	0.551964	0.359664	0.847081
RN7SKP299	0.00654573	1.81164	1.18046	2.7803
RP11-22L13.1	0.00655819	1.81572	1.18108	2.79136
RP5-991C6.4	0.00656311	0.554757	0.362736	0.848429
RP11-68I3.7	0.00656506	0.552188	0.359843	0.847344
KRT17P3	0.00656942	0.552194	0.359838	0.847377
WRN	0.00657028	0.55111	0.358621	0.846918
RP1-184J9.2	0.00659488	0.552297	0.359881	0.847591
LRRC42	0.00659648	1.80508	1.17879	2.76412
RNU1-100P	0.00659664	1.81773	1.18109	2.79754
DOC2GP	0.00660018	1.81314	1.18022	2.78547
UNC119	0.00660409	1.81734	1.18094	2.79667
RP11-349H17.2	0.00661081	0.55204	0.359547	0.847588
KCNIP3	0.00661115	0.552491	0.360053	0.847784
LINC00877	0.00661188	1.81895	1.18116	2.80113
LINC01014	0.00661251	2.97079	1.35394	6.51844
PRR33	0.00661879	1.81914	1.18113	2.80177
RCAN1	0.006624	1.81072	1.17956	2.77959
GNL3LP1	0.00662941	0.554163	0.361879	0.848618
HIVEP3	0.00663123	1.81294	1.17989	2.78563
FKBP3	0.00663969	1.8094	1.17918	2.77646
PLA2G15	0.00664512	1.8041	1.17816	2.76259
CPSF6	0.00664684	0.551317	0.358635	0.847521
RP11-18H21.3	0.00665287	1.81654	1.18034	2.79564
RP11-25O10.2	0.00666842	0.552931	0.360383	0.848353
RPL5P18	0.00666981	0.555154	0.362879	0.849308
RP11-103B5.4	0.0066713	0.554682	0.362344	0.849117
MTHFR	0.00667511	1.80903	1.17878	2.77625
CD163	0.00667831	1.81347	1.17955	2.78808
MBNL1-AS1	0.00668096	0.553577	0.361074	0.848711
RP5-1142A6.8	0.00668645	0.554573	0.362178	0.849171
RP11-252I14.2	0.00669589	0.555827	0.363564	0.849765
LRRC28	0.00673205	0.552839	0.360102	0.848736
MIR2467	0.00674232	0.55186	0.358975	0.848388
BCL10	0.00674416	1.80829	1.17801	2.77578
AC013286.1	0.00676282	0.550964	0.357913	0.848143
METTL2B	0.00676353	0.554151	0.361487	0.8495
CHMP2A	0.00676677	1.7988	1.17609	2.75122
FCGR2C	0.00676711	1.80715	1.1776	2.77327
RP11-386M24.1	0.00677593	0.550456	0.357307	0.848014
RP11-300M6.1	0.00677759	0.554728	0.362096	0.849837
RP11-20D14.4	0.00677848	1.82425	1.18056	2.81892
RP11-43D4.2	0.00680166	0.554852	0.362169	0.850047
DDRGK1	0.00680316	1.79826	1.17567	2.75056
RNU6-341P	0.00680488	0.555189	0.36254	0.85021
SNRNP40	0.00682178	1.80206	1.17618	2.76099
RP11-254F7.2	0.00682374	1.80795	1.17722	2.77661
KIF28P	0.00682428	0.554768	0.362011	0.850159
AKR7A2	0.00683847	1.8027	1.17615	2.76303
PDLIM5	0.00684781	1.81173	1.17768	2.78714
CRISPLD1	0.00685002	1.82046	1.17922	2.81041
ATP13A4-AS1	0.0068613	0.552377	0.359222	0.849391
C9orf142	0.00688164	1.8024	1.1757	2.76313
TRDV2	0.00688263	0.553742	0.360696	0.850107
UBE4A	0.0069011	1.80703	1.17636	2.77581
RPS3AP29	0.00690498	0.556821	0.364102	0.851547
FAM107A	0.00692282	0.549544	0.355881	0.848595
RP11-459I19.1	0.0069244	1.81345	1.17729	2.79336
IGHD1-20	0.00692479	1.82107	1.17865	2.81366
RP11-188P17.2	0.00693651	0.554437	0.361329	0.850749
RP11-424M22.1	0.00693699	0.555802	0.362864	0.851326
ACTBP1	0.00693736	1.80748	1.17611	2.77778
OR8R1P	0.00694538	0.5549	0.361826	0.851001
RPL31P7	0.00694622	0.556081	0.363154	0.851502
RP11-20B24.5	0.00698252	0.553463	0.360108	0.850637
NACA3P	0.00698314	0.55508	0.361924	0.85132
AC096574.5	0.00699158	1.80853	1.17581	2.78171
HSP90B2P	0.00699213	0.549582	0.355733	0.849065
RP11-384L8.2	0.00701099	0.553695	0.360291	0.850919
KIR2DL4	0.00701212	1.79798	1.17375	2.75418
POLDIP2	0.00701735	1.79948	1.17398	2.75826
ANTXR1	0.0070189	0.556322	0.363226	0.852069
LINC00963	0.00702316	1.79953	1.17393	2.75852
RP11-478C6.2	0.00702905	0.551253	0.357502	0.850009
HMGB1P14	0.00703753	0.556178	0.363013	0.852128
GGNBP1	0.00703792	1.81044	1.17574	2.78776
IGKV1OR22-1	0.00704052	0.554762	0.361411	0.851556
TRABD	0.00705033	1.80363	1.17442	2.76994
RP11-1057B6.1	0.00705547	0.55628	0.363079	0.852286
AC108004.2	0.00706924	0.5548	0.361374	0.851755
HTR2B	0.00707104	0.556686	0.363495	0.852554
SLC35A3	0.00707242	0.557707	0.364644	0.852988
AC025918.2	0.0070749	0.554833	0.361397	0.851805
AC080037.1	0.00708204	0.552618	0.358888	0.850924
LILRB1	0.00708309	1.80504	1.17438	2.77436
CD93	0.00708336	1.81044	1.17534	2.78873
RP11-401N16.2	0.00708731	0.556384	0.36311	0.852532
NSMAF	0.00709998	0.555138	0.361672	0.852093
DGUOK	0.00710211	1.79306	1.17209	2.74302
VPS26B	0.0071222	1.78945	1.17128	2.73389
RNU6-1043P	0.00712491	0.556069	0.362653	0.852639
RLN1	0.00713263	0.555354	0.361828	0.85239
CA15P1	0.00713677	0.558203	0.365031	0.853602
CTD-2609K8.3	0.00713797	0.549153	0.354859	0.84983
GNRHR	0.00714135	0.556365	0.362944	0.852867
RP11-394B2.7	0.00714354	0.555241	0.361671	0.852413
AC025284.1	0.0071491	0.54608	0.351403	0.848608
CMTM5	0.00715368	1.80748	1.17419	2.78233
HK1	0.00715531	1.7984	1.17258	2.75824
RNU6-190P	0.00716397	0.555464	0.361866	0.852635
RTP5	0.00718598	1.79539	1.17178	2.75089
POPDC3	0.00720257	1.84982	1.18114	2.89705
RP11-419N10.5	0.00722318	0.556576	0.362962	0.85347
TCERG1	0.00722482	0.557017	0.363454	0.853663
RP11-168F9.2	0.007227	0.556029	0.362335	0.853267
LEP	0.00722847	0.558107	0.364676	0.854137
RP1-224A6.3	0.00724088	1.79775	1.17172	2.75826
RP11-264L1.3	0.00724405	0.558007	0.364521	0.854193
HSPA4	0.00725945	1.80647	1.17309	2.78183
BAK1	0.00726126	1.79488	1.17104	2.75105
RP11-53O19.1	0.00726693	0.557626	0.36403	0.854179
AC000403.4	0.00727142	1.79904	1.17168	2.76229
AC016734.2	0.00727447	1.79616	1.17115	2.75472
SLIT2	0.00727706	0.557313	0.36365	0.854113
CFD	0.00728225	0.549734	0.355122	0.850997
ARNTL	0.00728584	1.79883	1.17152	2.76203
GTF2B	0.00730029	1.78983	1.16982	2.73845
PREB	0.00730345	1.79103	1.17	2.74169
RNU6-850P	0.00731655	0.557204	0.363422	0.854314
Six3os1_5	0.00731894	0.455172	0.256079	0.809055
PSMB2	0.00732941	1.79315	1.17015	2.74785
SPAG6	0.00733175	1.80344	1.17194	2.77523
AC004623.3	0.00733683	0.554126	0.3599	0.853168
ETV6	0.00733914	0.558154	0.364435	0.854846
KATNBL1P5	0.00734313	1.80636	1.17235	2.78325
RAB3D	0.00734437	1.79224	1.16987	2.74572
HMGN3-AS1	0.00734592	0.555846	0.361813	0.853936
RP11-299J3.8	0.00734722	0.557941	0.364173	0.854808
MINOS1	0.00736311	1.78937	1.1692	2.73849
HMGB2P1	0.00736651	1.79567	1.17028	2.75526
CLTA	0.00739894	1.79292	1.16952	2.7486
ALDOAP2	0.00740262	1.79236	1.16939	2.74719
RNU6-964P	0.00740517	0.554265	0.359877	0.853652
METTL10	0.0074376	0.555014	0.360635	0.854163
FXN	0.00744023	1.79839	1.17013	2.76398
RP11-378J18.8	0.00745163	0.556749	0.362553	0.854963
RP11-545I5.3	0.00745628	0.558765	0.364818	0.855819
MIR6870	0.00745918	0.554072	0.359519	0.853908
AC091177.1	0.00746728	1.801	1.17035	2.77148
DOCK5	0.00747174	0.556932	0.362707	0.855162
RP11-1029M24.4	0.00747654	0.55738	0.3632	0.855375
MRPL37P1	0.00748068	1.79908	1.16991	2.76663
RN7SL518P	0.00748632	0.556223	0.361869	0.85496
SAMD11	0.00751719	0.55556	0.361041	0.854878
RP13-494C23.1	0.00753811	1.79784	1.16921	2.76445
CYP2U1	0.00754015	1.80065	1.16968	2.77198
COTL1	0.00754394	1.791	1.16797	2.74637
TIMM10B	0.00755302	1.79538	1.16866	2.7582
FKBP4P1	0.0075763	0.560334	0.366283	0.85719
RPL3P1	0.00759108	0.555865	0.361194	0.855456
AC008937.3	0.00760075	0.560275	0.366153	0.857314
ZNF532	0.0076056	1.7888	1.16708	2.74172
AC008074.5	0.00760929	1.79012	1.16728	2.74529
EGFR	0.00761604	0.558174	0.363736	0.856551
RP6-91H8.1	0.00764515	0.543891	0.34767	0.850858
A1BG	0.00764981	0.557928	0.363371	0.856656
AL139295.1	0.00766353	0.55746	0.362807	0.856548
ASPH	0.00767168	0.556712	0.361942	0.856293
ARL6IP5	0.00768833	1.79356	1.16722	2.75601
BCKDHB	0.00769784	0.558949	0.364403	0.85736
PSME2	0.00770522	1.79464	1.16727	2.75921
CTC-454I21.3	0.00771191	0.560422	0.366034	0.858042
CASP10	0.00771242	1.78637	1.16579	2.73731
RP11-65J3.3	0.00771724	0.557136	0.362304	0.856741
RP11-624D20.1	0.0077245	0.561514	0.367241	0.858558
STARD7	0.00773731	1.7954	1.16714	2.76186
SEPT7P7	0.00774729	0.560582	0.366126	0.858318
BAG3	0.00776457	1.78876	1.16577	2.74468
TMEM205	0.00778427	1.78942	1.16573	2.7468
RP11-398A8.1	0.00778546	1.78952	1.16573	2.74709
ZNF292	0.00780786	0.560415	0.365783	0.858611
RNU7-170P	0.00784447	0.559182	0.364294	0.858331
RP11-229P13.19	0.00785814	1.78213	1.16388	2.72879
RP11-420A6.2	0.00786207	0.561881	0.36731	0.859522
ZNF253	0.00786227	0.560146	0.365341	0.858825
XPO6	0.00786429	1.78385	1.16413	2.73349
MRPL39	0.00787513	1.78619	1.16444	2.73991
MED18	0.00787604	1.78649	1.16448	2.74074
LSM4	0.00789041	1.78964	1.16491	2.74943
RNU6-645P	0.00789098	0.563041	0.368555	0.860157
C7orf72	0.00789112	1.79087	1.16511	2.75272
SLC27A4	0.00789282	1.77819	1.16293	2.71897
UBN2	0.00790395	0.557067	0.361754	0.857831
RPS2P4	0.00790992	0.559391	0.364366	0.858803
COX6CP2	0.00791107	1.78785	1.16443	2.74502
CTD-2515A14.1	0.00792291	0.560146	0.365189	0.859183
CDC37	0.00793084	1.77892	1.16275	2.72162
RTN2	0.00794473	1.78567	1.16379	2.73985
SMAD9-IT1	0.00794982	0.561633	0.366807	0.859937
LRRC27	0.00795244	1.79764	1.16577	2.77201
C14orf105	0.00795392	0.561673	0.366842	0.859977
RPL39P3	0.00795471	0.562838	0.368165	0.860448
THOP1	0.00795723	1.77641	1.16211	2.71542
NRCAM	0.00795928	0.562651	0.36794	0.8604
TSEN34	0.00796616	1.78662	1.16379	2.74278
LRRC19	0.00797815	0.562179	0.367357	0.860322
RP13-539J13.1	0.00797949	0.511595	0.311805	0.839399
RP11-293A21.1	0.00799803	1.80121	1.166	2.78245
CTD-2561B21.10	0.00800639	0.558677	0.363317	0.859085
RP11-89N17.1	0.00801229	0.559047	0.363721	0.859268
THRSP	0.0080154	0.560027	0.364822	0.859678
PHF14	0.00801862	0.562153	0.367227	0.860547
OR9A4	0.00802473	0.559991	0.364759	0.859719
RN7SL644P	0.00803577	0.562348	0.367406	0.860725
PHF5A	0.00803615	1.79088	1.16395	2.75547
SEPHS1P6	0.00804825	1.78049	1.16209	2.72795
AFF2	0.00805289	0.560741	0.365539	0.860183
SCIMP	0.00806737	1.78672	1.163	2.74494
RP11-454L9.2	0.00807545	0.560955	0.365725	0.8604
CT45A10	0.00808358	1.82745	1.16971	2.85504
SNORA28	0.00808996	0.563385	0.368451	0.861451
GRK6P1	0.00809625	0.560414	0.365061	0.860305
PVRL1	0.00809815	0.559723	0.364273	0.86004
MTMR4	0.00811144	0.552701	0.356326	0.857303
MINA	0.00811684	1.78856	1.16292	2.75079
SOX15	0.00812161	0.559055	0.363459	0.85991
GAPDHP69	0.00812723	0.5591	0.363496	0.859961
SLCO4A1-AS1	0.00812771	1.7885	1.16282	2.75083
AHSA1	0.00813031	1.78179	1.16167	2.73294
PKIB	0.0081353	1.79431	1.16374	2.76655
RP11-179A10.2	0.00813668	1.78874	1.1628	2.75164
LINC00852	0.00814966	0.561664	0.366348	0.861112
SMOC1	0.00814982	0.562721	0.367548	0.861533
STAG3	0.00815339	0.562327	0.367092	0.861397
UBE2L3	0.00815687	1.7812	1.16136	2.73185
RP11-1072C15.1	0.0081669	0.562417	0.367161	0.861511
AKAP1	0.00817099	1.78096	1.16121	2.73147
SND1-IT1	0.00817822	0.556087	0.359968	0.859055
RN7SL67P	0.00819231	0.559661	0.363972	0.860562
FLNA	0.00819292	1.77749	1.16046	2.7226
RNASEH2A	0.00822716	1.78171	1.1609	2.7345
FAM46A	0.0082273	0.559244	0.363414	0.860599
MRPL36	0.00822838	1.77467	1.15971	2.71572
NDUFC1	0.00825608	1.77743	1.15996	2.7236
HDAC3	0.00826161	1.78043	1.16042	2.73171
RP11-256I23.2	0.00826552	0.562805	0.367362	0.86223
FLT4	0.00827213	0.557971	0.361866	0.860352
FAM175A	0.0082871	0.56351	0.36811	0.862631
CDK14	0.00829755	0.558406	0.362295	0.860671
MTX1P1	0.00830474	1.77332	1.1589	2.71349
SLC22A5	0.00830675	1.78658	1.16111	2.74899
PSMB5	0.00830707	1.77862	1.15977	2.72769
RNU6-135P	0.00830728	0.563666	0.36824	0.862807
C22orf42	0.00831482	1.77719	1.15947	2.724
RNU6-1025P	0.00831553	0.563919	0.368508	0.862953
RP4-785G19.5	0.00831981	0.561889	0.366189	0.862177
RP11-258F22.1	0.0083242	0.562204	0.366535	0.862326
PRTFDC1	0.00832449	1.79078	1.16167	2.7606
RNU6-254P	0.00832871	0.562126	0.366436	0.862321
IL3RA	0.00833508	1.78173	1.16008	2.73651
UBE2CP3	0.00833925	0.562685	0.367046	0.862602
RP11-972P1.7	0.00834301	0.561103	0.365239	0.861999
LRRN3	0.00836493	0.565375	0.370048	0.863805
FAM204BP	0.00836723	0.5657	0.370413	0.863945
LINC01545	0.00837063	0.563851	0.368297	0.863238
RP11-382A20.3	0.00837332	0.559659	0.36353	0.861602
C19orf66	0.00837628	1.77113	1.15798	2.70892
HOXB1	0.00839147	1.77909	1.1592	2.73046
KCNQ5	0.00840332	0.5608	0.364751	0.862223
RP1-256G22.2	0.00841506	0.5645	0.368929	0.863744
RNU6-677P	0.00842272	0.562653	0.366808	0.863062
AREG	0.00842327	1.77598	1.15844	2.72271
EIF2S2P5	0.00843348	0.565447	0.369964	0.864218
RPGRIP1L	0.00845106	0.563498	0.367702	0.863553
RP11-428K3.1	0.00845483	0.562927	0.367043	0.863351
SRP14-AS1	0.00846617	1.77936	1.15868	2.73253
RP11-178L8.6	0.00847076	0.563433	0.36758	0.863639
C1orf50	0.00847304	1.7775	1.15832	2.72768
RP11-325D15.2	0.00848213	0.563902	0.368088	0.863886
RP11-91I20.4	0.00849407	0.561892	0.365772	0.863166
HAGLR	0.00850075	0.563259	0.367311	0.863739
LINC00399	0.00850345	0.558571	0.361987	0.861914
AC000095.11	0.00850412	0.564415	0.368619	0.86421
GPR1	0.0085075	0.564947	0.369218	0.864437
AQP10	0.00853098	1.77711	1.15782	2.72764
TRBV22-1	0.0085351	0.563471	0.36747	0.864014
FARP2	0.00854699	1.77568	1.15746	2.7241
MKRN2	0.00855656	0.562132	0.365897	0.863611
OPA1-AS1	0.0085585	0.561209	0.364845	0.863261
ADGRL4	0.00856505	0.563209	0.367101	0.864079
TPPP3	0.00857368	1.77042	1.15639	2.7105
C14orf142	0.0085777	1.77882	1.15775	2.73306
CTB-20D2.1	0.00858363	0.564731	0.36879	0.864776
RP11-1112G13.3	0.00858756	0.56387	0.3678	0.864463
PHKG1P2	0.00859864	0.437218	0.23588	0.810411
LMF1-AS1	0.00860075	0.564381	0.368351	0.864735
CD2BP2	0.00860898	1.77196	1.15638	2.71523
FAHD2CP	0.0086119	1.77609	1.15704	2.72634
RP11-538P18.1	0.00862101	0.5652	0.369236	0.865166
RPS6KA2	0.00862373	0.563032	0.366761	0.864337
AC009120.3	0.00863173	0.565284	0.369308	0.865258
KIF16B	0.00863251	1.78239	1.15793	2.74361
STAMBPL1	0.00866057	0.565173	0.369113	0.865374
KIAA0355	0.00866603	0.560157	0.363397	0.863452
PPM1A	0.00866922	0.561419	0.364821	0.863962
GS1-124K5.3	0.00867113	0.562363	0.365888	0.864341
DFFBP1	0.00869416	0.563982	0.367676	0.865097
FCF1P1	0.00870409	0.565593	0.369489	0.865777
MIR340	0.00870827	0.564733	0.368498	0.865466
AC011515.2	0.00871613	1.7747	1.15604	2.72443
MIR640	0.00871772	0.562503	0.365939	0.864654
EVA1A	0.00872417	0.562068	0.365429	0.86452
KDM3A	0.00872836	0.563852	0.367448	0.865236
CDK20	0.00874273	1.76865	1.15485	2.7087
SNRPFP2	0.00874393	0.56676	0.370729	0.866446
CAB39	0.00875125	1.77013	1.15503	2.71279
RNASEH1	0.00875537	1.77035	1.15503	2.71345
CTC-529P8.1	0.00875848	1.78266	1.15703	2.74656
MED28	0.0087733	0.562647	0.365972	0.865017
RP11-128N14.4	0.00880616	0.5647	0.368232	0.865991
EPB41L3	0.00880735	1.76809	1.15428	2.7083
CT45A1	0.00881393	1.80579	1.16038	2.81019
ERVH48-1	0.00883732	0.566465	0.370174	0.866842
ACOT2	0.00884056	1.76762	1.15396	2.70759
ADCY7	0.00884639	1.76938	1.15421	2.71242
RP11-394O4.3	0.00884978	1.77636	1.15533	2.73122
ATP6V1H	0.00886188	1.77738	1.15541	2.73417
ACTA2-AS1	0.00886919	0.566173	0.369766	0.866903
DEPDC7	0.00887221	0.562886	0.366013	0.865653
ZNF277	0.00888765	0.5676	0.371355	0.86755
RP11-506O24.1	0.00889127	0.527871	0.327082	0.851922
RPL23AP11	0.00889221	0.564199	0.367462	0.866269
CTC-347C20.1	0.00889275	0.567788	0.371559	0.86765
CUL4B	0.00889619	0.564768	0.368101	0.866509
STRADBP1	0.00892661	1.77151	1.15398	2.7195
METTL12	0.00894825	1.77079	1.1537	2.71795
CMTR1	0.00895115	1.76539	1.1528	2.70349
ORMDL2	0.00895138	1.76527	1.15278	2.70319
ZNF440	0.00895482	0.564692	0.36788	0.866799
WDFY3-AS2	0.00898041	0.562278	0.365073	0.866009
NBR1	0.00898556	1.76772	1.15294	2.71033
SDHB	0.00898698	1.76641	1.15271	2.70684
ZDHHC7	0.00899753	1.77181	1.15352	2.72153
ZBTB12	0.00899882	0.563502	0.366423	0.86658
RP11-108K14.12	0.00900177	0.56574	0.368967	0.867454
FOXP1-AS1	0.0090021	0.565652	0.368866	0.867422
AC007392.3	0.0090092	1.76856	1.1529	2.71297
MTMR1	0.00902216	1.77537	1.15391	2.73151
RNU6-761P	0.00903333	1.76936	1.15286	2.71554
ENDOG	0.00904504	1.76064	1.15136	2.69235
HNRNPA1P25	0.009046	0.56536	0.368432	0.867547
RP11-281A20.2	0.00905255	1.76489	1.152	2.70386
ITGB2	0.00905534	1.76695	1.15231	2.70945
NARS2	0.00905779	0.565402	0.368452	0.867626
CCR1	0.00906346	1.76807	1.15243	2.71257
RP11-31F15.2	0.00906697	1.76869	1.15251	2.7143
RP11-18B3.3	0.00906777	1.77729	1.1539	2.73748
RP11-22B23.2	0.00908955	1.76867	1.15235	2.71462
LINC00298	0.00909903	1.76799	1.15217	2.71296
PTGS1	0.00912609	1.77669	1.15338	2.73685
NF1	0.0091293	0.566848	0.369942	0.868561
RP13-1056D16.2	0.00914913	0.567809	0.370996	0.869031
AC005154.6	0.00915621	0.565304	0.368117	0.868117
FAM109B	0.00915695	1.7608	1.15059	2.69462
RP11-415J8.7	0.0091593	0.567768	0.370926	0.86907
LRRC37A16P	0.00916948	0.566507	0.36946	0.868645
GPR174	0.00919079	0.564918	0.367599	0.868154
ODF3L1	0.0092084	1.76085	1.15024	2.6956
LYPLAL1-AS1	0.00922602	0.568532	0.37165	0.869712
ZNF511	0.00922672	1.76439	1.15068	2.70541
MTMR12	0.0092402	1.76946	1.1514	2.71926
PPM1F	0.00924231	1.76377	1.15048	2.70401
CDC42EP1	0.00926437	1.76864	1.1511	2.71746
KIAA0087	0.00926547	1.76487	1.15049	2.70733
DPYSL2	0.00927037	1.76519	1.15051	2.70829
RP11-1102P22.1	0.00928226	0.568449	0.371429	0.869977
PTP4A1P3	0.00929433	0.567684	0.370525	0.869752
IGHD5-12	0.00931834	1.77499	1.15174	2.7355
C4orf36	0.00932016	1.7634	1.14987	2.70429
CD4	0.00932993	1.76396	1.14989	2.70595
ZNF254	0.00933684	0.567959	0.370745	0.870079
ZBTB43	0.00934415	1.76166	1.14943	2.69999
MYO16-AS1	0.00934723	0.564509	0.366781	0.868831
RP11-1079H9.1	0.00936881	0.570003	0.373017	0.871015
CTD-2326C4.1	0.00937073	0.563545	0.36563	0.86859
PWWP2B	0.00937737	1.76618	1.14992	2.71271
CLEC11A	0.00938626	0.565901	0.368282	0.869563
CGNL1	0.0093871	1.77593	1.15141	2.73921
CTD-2201I18.1	0.00939684	0.566718	0.369191	0.869926
MRPL16	0.00939967	1.763	1.14926	2.7045
CAMK2D	0.00940169	1.76786	1.15002	2.71764
RP11-9E17.1	0.00942937	0.56658	0.368961	0.870045
NADK2	0.00943409	0.565385	0.367587	0.86962
COL4A1	0.00945487	0.566059	0.368309	0.869982
IGHD3-3	0.00945976	1.77622	1.15094	2.74118
RP11-305L7.6	0.00946069	0.568681	0.371296	0.870997
PLCD3	0.00947269	1.76133	1.14849	2.7012
ABHD17C	0.00947492	1.76722	1.14941	2.7171
GRK1	0.00947591	0.565012	0.367068	0.869699
ERH	0.00947691	1.77094	1.14999	2.72719
METRN	0.00947809	0.563479	0.365316	0.869132
ZNF233	0.00948195	0.564903	0.366931	0.869689
SOCS7	0.00948866	0.564357	0.366294	0.869519
RP11-2E11.9	0.00950339	0.567885	0.37029	0.870921
GNG2	0.00950471	0.567341	0.369665	0.870724
SLC16A8	0.00950517	1.76647	1.14908	2.71559
ZNF849P	0.00952212	0.567442	0.369741	0.870852
RP11-313P13.5	0.00953021	0.570245	0.372937	0.871942
OPRL1	0.00953143	1.75394	1.14691	2.68225
AC007875.2	0.00953865	0.570124	0.372779	0.87194
NAV2-AS5	0.00955002	0.570304	0.372961	0.872066
PABPC1P10	0.00956608	1.75811	1.14733	2.69402
PRR7	0.00957595	1.75493	1.14676	2.68564
SIRT6	0.00957699	1.75807	1.14726	2.69411
RN7SKP158	0.00959123	0.570679	0.373302	0.872418
BRMS1L	0.00960371	0.569416	0.371824	0.872012
ABLIM3	0.00960785	1.76034	1.14741	2.7007
KLB	0.00961659	0.570562	0.373111	0.872504
HSPA7	0.00961834	1.75761	1.1469	2.69352
C2CD2	0.00963398	0.568648	0.370877	0.871881
DNAJA3	0.00964432	1.7554	1.14638	2.68798
CTD-2034I4.2	0.00965917	0.566459	0.368317	0.871195
PDCD10	0.00966893	1.76008	1.14695	2.70097
RP11-749I16.3	0.00969696	0.569419	0.371623	0.872491
C7orf50	0.0097052	1.76048	1.14677	2.70263
RP11-356N1.2	0.00970548	1.75468	1.14585	2.68701
MTFP1	0.00971055	1.75806	1.14635	2.69619
RANBP3L	0.00972225	0.569134	0.371242	0.872515
AC091038.1	0.00972614	0.570652	0.372975	0.873097
CBLN3	0.00972757	1.75551	1.14583	2.68958
FOXR1	0.00974566	1.76327	1.14693	2.71081
EIF4E2	0.0097581	1.75671	1.14582	2.69331
MED21	0.00977336	0.569718	0.3718	0.872992
MEFV	0.00977976	1.75794	1.14587	2.69695
RP11-576N17.2	0.00981244	0.569021	0.370917	0.872933
PCNXL2	0.00981385	1.75324	1.1449	2.68483
DNM1	0.00982411	0.567379	0.36901	0.872384
PLSCR2	0.00983111	1.7544	1.14497	2.6882
FRY	0.00983137	0.570582	0.372667	0.873605
CTB-55O6.12	0.0098408	0.569055	0.370894	0.873089
CCDC137	0.00984525	1.75411	1.14483	2.68766
CNPY4	0.00985341	1.7497	1.14408	2.67589
BEX2	0.00985717	1.74751	1.14371	2.67007
UHRF2P1	0.00986005	0.569312	0.371148	0.873282
FH	0.00986515	1.75687	1.14513	2.69541
SDSL	0.00986939	1.75474	1.14477	2.68972
CTD-2349P21.9	0.0098824	0.570815	0.372825	0.873949
PSMA5	0.00989798	1.75121	1.14402	2.68066
RP11-75L1.6	0.0099031	1.75471	1.14454	2.69018
RP11-54O7.2	0.00990347	0.567552	0.369038	0.872853
GLIS3	0.00990491	0.568392	0.369996	0.87317
BCL2L11	0.00991398	1.75377	1.14432	2.68779
[truncated: 3,239 more rows]
